1 **Title:** Macrophage mediated recognition and clearance of *Borrelia burgdorferi* elicits  
2 MyD88-dependent and -independent phagosomal signals that contribute to phagocytosis  
3 and inflammation

4  
5 **Authors:** Sarah J. Benjamin<sup>1,2</sup>, Kelly L. Hawley<sup>1,6</sup>, Paola Vera-Licona<sup>1,3,4,5</sup>, Carson J. La  
6 Vake<sup>1</sup>, Jorge L. Cervantes<sup>1,6,†</sup>, Rachel Burns<sup>7</sup>, Oscar Luo<sup>8,‡</sup>, Yijun Ruan<sup>8</sup>, Melissa J.  
7 Caimano<sup>1,9,10</sup>, Justin D. Radolf<sup>1,2,6,9,10,11</sup>, and Juan C. Salazar<sup>1,2,6,9</sup>

8  
9 <sup>1</sup>Department of Pediatrics, UConn Health, Farmington CT 06030.

10 <sup>2</sup>Department of Immunology, UConn Health, Farmington CT 06030.

11 <sup>3</sup>Center for Quantitative Medicine, UConn Health, Farmington CT 06030

12 <sup>4</sup>Department of Cell Biology, UConn Health, Farmington CT 06030

13 <sup>5</sup>Institute of Systems Genomics, UConn Health, Farmington CT 06030

14 <sup>6</sup>Division of Infectious Diseases, Connecticut Children's Medical Center, Hartford CT  
15 06106

16 <sup>7</sup>Department of Veterinary Pathology, University of Connecticut, Storrs CT

17 <sup>8</sup>The Jackson Laboratory for Genomic Medicine, Farmington CT 06032

18 <sup>9</sup>Department of Medicine, UConn Health, Farmington CT 06030

19 <sup>10</sup>Department of Molecular Biology and Biophysics, UConn Health, Farmington CT 06030

20 <sup>11</sup>Department of Genetics and Genomic Sciences, UConn Health, Farmington CT  
21 06030

22  
23 <sup>†</sup>Current Affiliation: Paul L. Foster School of Medicine, Texas Tech University Health Sciences  
24 Center, El Paso, TX 79905

25  
26 <sup>‡</sup>Current Affiliation: Transformational Bioinformatics, Health and Biosecurity Business Unit,  
27 CSIRO, North Ryde, NSW 2113, Australia

28  
29 Address for correspondence:

30 Juan C. Salazar, MD, MPH

31 Connecticut Children's Medical Center, Division of Pediatric Infectious Diseases and Immunology  
32 282 Washington Street

33 Hartford, CT 06106

34 jsalazar@uchc.edu

35 **ABSTRACT**

36 Lyme disease is a tick-borne illness caused by the spirochete *Borrelia burgdorferi* (Bb). It  
37 is believed that the robust inflammatory response induced by the host's innate immune  
38 system is responsible for the clinical manifestations associated with Bb infection. The  
39 macrophage plays a central role in the immune response to many bacterial infections and  
40 is thought to play a central role in activation of the innate immune response to Bb.  
41 Previous studies have shown that following phagocytosis of spirochetes by macrophages,  
42 phagosome maturation results in degradation of *Bb* and liberation of bacterial lipoproteins  
43 and nucleic acids, which are recognized by TLR2 and TLR8, respectively, and elicit  
44 MyD88-mediated phagosome signaling cascades. Bone marrow-derived macrophages  
45 (BMDMs) from *MyD88*<sup>-/-</sup> mice show significantly reduced spirochete uptake and  
46 inflammatory cytokine production when incubated with *Bb ex vivo*. Paradoxically,  
47 additional studies revealed that Bb-infected *MyD88*<sup>-/-</sup> mice exhibit inflammation in joint  
48 and heart tissues. To determine the contribution of MyD88 to macrophage-mediated  
49 spirochete clearance, we compared wildtype (WT) and *MyD88*<sup>-/-</sup> mice using a murine  
50 model of Lyme disease. *MyD88*<sup>-/-</sup> mice showed increased Bb burdens in hearts 28 days  
51 post infection, while H&E staining and immunohistochemistry showed significantly  
52 increased inflammation and greater macrophage infiltrate in the hearts of *MyD88*<sup>-/-</sup> mice.  
53 This suggests that Bb triggers MyD88-independent inflammatory pathways in  
54 macrophages to facilitate cell recruitment to tissues. Upon stimulation with *Bb ex vivo*,  
55 WT and *MyD88*<sup>-/-</sup> BMDMs exhibit significant differences in bacteria uptake, suggesting  
56 that MyD88 signaling mediates cytoskeleton remodeling and the formation of membrane  
57 protrusions to enhance bacteria phagocytosis. A comprehensive transcriptome  
58 comparison in Bb-infected WT and *MyD88*<sup>-/-</sup> BMDMs identified a large cohort of MyD88-  
59 dependent genes that are differentially expressed in response to Bb, including genes  
60 involved in actin and cytoskeleton organization (*Daam1*, *Fmnl1*). We also identified a  
61 cohort of differentially-expressed MyD88-independent chemokines (*Cxcl2*, *Ccl9*) known  
62 to recruit macrophages. We identified master regulators and generated networks which  
63 model potential signaling pathways that mediate both phagocytosis and the inflammatory

64 response. These data provide strong evidence that MyD88-dependent and -independent  
65 phagosomal signaling cascades in macrophages play significant roles in the ability of  
66 these cells to phagocytose Bb and mediate infection.

67 **AUTHOR SUMMARY**

68 Macrophages play prominent roles in bacteria recognition and clearance, including  
69 *Borrelia burgdorferi* (Bb), the Lyme disease spirochete. To elucidate mechanisms by  
70 which MyD88/TLR signaling enhances clearance of Bb by macrophages, we studied Bb-  
71 infected wildtype (WT) and MyD88<sup>-/-</sup> mice and Bb-stimulated bone marrow-derived  
72 macrophages (BMDMs). Bb-infected MyD88<sup>-/-</sup> mice show increased bacterial burdens,  
73 macrophage infiltration and altered gene expression in inflamed heart tissue. MyD88<sup>-/-</sup>  
74 BMDMs exhibit impaired uptake of spirochetes but comparable maturation of  
75 phagosomes following internalization of spirochetes. RNA-sequencing of infected WT  
76 and MyD88<sup>-/-</sup> BMDMs identified a large cohort of differentially expressed MyD88-  
77 dependent genes involved in re-organization of actin and cytoskeleton during  
78 phagocytosis along with several MyD88-independent chemokines involved in  
79 inflammatory cell recruitment. We computationally generated networks which identified  
80 several MyD88- independent master regulators (*Cxcl2* and *Vcam1*) and MyD88-  
81 dependent intermediate proteins (*Rhoq* and *Cyfp1*) that are known to mediate  
82 inflammation and phagocytosis respectively. These results provide mechanistic insights  
83 into MyD88-mediated phagosomal signaling enhancing Bb uptake and clearance.

84

85 **INTRODUCTION**

86

87 Lyme disease (LD) is a highly prevalent tick-borne illness caused by the spirochetal  
88 bacterium *Borrelia burgdorferi* (Bb) (1-3). The disease is characterized by a wide array of  
89 clinical manifestations which vary in duration and severity between patients. Early clinical  
90 manifestations of LD include the characteristic "bullseye" rash known as *erythema*  
91 *migrans* and flu-like symptoms, while late manifestations include arthritis, carditis and  
92 neurological compromise (4, 5). The invading spirochete induces both innate and  
93 adaptive immune responses, and it is believed that the innate immune response to Bb  
94 contributes to the development of the clinical findings characteristic of LD (6). The  
95 macrophage is a principal cellular element of the innate immune response to the  
96 bacterium at sites of infection in both humans and mice (7-9). Macrophages also play a  
97 prominent role in the pathogenesis of murine Lyme carditis, and their recruitment to heart  
98 tissue is important in spirochetal clearance (10). Macrophages have the phagocytic and  
99 signaling machinery necessary to bind, engulf, and degrade Bb. Binding of Bb to  
100 macrophages is mediated by surface integrins, such as Complement Receptor 3 (CR3)  
101 (11, 12) and  $\alpha_3$  (13). Once attached, phagocytosis of Bb is complex and can occur by  
102 either a sinking or coiling mechanism (14, 15). Both cases require rearrangements of the  
103 actin cytoskeleton to internalize Bb into the endosome, where degradation takes place  
104 (16).

105

106 Bb is an extracellular pathogen that needs to be taken up and degraded for significant  
107 recognition by the host immune system (17). We have defined this process as  
108 "phagosomal signaling" (14). Spirochete degradation exposes borrelial pathogen-  
109 associated molecular patterns (PAMPs), such as lipoproteins and nucleic acids, to  
110 endosomal toll-like receptors (TLRs) for recognition, resulting in signaling cascades which  
111 induce pro-inflammatory cytokine production (17-19). Bb does not contain LPS and,  
112 therefore, does not engage TLR4. The cell envelope of Bb contains abundant triacylated  
113 lipoproteins (20), which are known to be recognized by TLR1/2 heterodimers (21-26).  
114 However, the three fatty acid chains in the N-terminus of Bb lipoproteins, which serve as  
115 the TLR2/1 PAMP, are tethered in the outer membrane (27). We have shown that this

116 results in minimal recognition of lipoproteins in intact spirochetes at the cell surface (17,  
117 18, 21, 28). Instead, principal recognition of Bb TLR2 ligands occurs within macrophage  
118 endosomal structures after the spirochete is phagocytosed and degraded (17, 28).  
119 Bacterial degradation results in exposure of both lipoprotein ligands and nucleic acids,  
120 which are recognized by endosomal TLR2 and TLRs 7, 8 and 9 respectively (18, 19, 29).  
121 Signaling cascades initiated by engagement of these TLRs utilize the adaptor protein  
122 MyD88(14, 30), indicating that this adaptor protein is a crucial element in mediating the  
123 inflammatory response to Bb.

124

125 A role for MyD88 has been implicated in each of the four general steps associated with  
126 phagocytic clearance of bacterial pathogens: uptake, maturation, degradation and  
127 cytokine production. Murine macrophages lacking MyD88 show markedly diminished  
128 uptake of several bacterial species, including Bb (28, 31-35). Prior studies have shown  
129 that Bb-induced MyD88 signaling results in increased PI3K activation, while inhibition of  
130 PI3K results in decreased Bb uptake by macrophages (36). In addition, formin proteins  
131 (FMNL1, mDia1, and Daam1) have also been shown to play a critical role in mediating  
132 phagocytosis of Bb (15, 37). Whether MyD88 increases activation of these formins, and  
133 the role of PI3K signaling in this process, has not been established. Degradation of  
134 bacteria is also impaired in the absence of MyD88 due to inefficient acidification of  
135 phagosomes (38). In the context of Bb infection, lysosome maturation markers are  
136 recruited to Bb-containing phagosomes in macrophages lacking MyD88 (28). However,  
137 the degree of phagosome maturation and acidification required to expose Bb ligands from  
138 the bacteria cell envelope for recognition has not been studied. Murine macrophages  
139 lacking MyD88 also show markedly diminished production of NF $\kappa$ B-triggered pro-  
140 inflammatory cytokines, such as TNF $\alpha$  and IL-6, when stimulated with different bacterial  
141 species, including Bb (28, 31). Nevertheless, the key host components involved  
142 downstream of these MyD88-mediated phagosome signals and their effects have not  
143 been well studied in the context of Bb infection.

144

145 Here we show using a murine model of LD that MyD88 plays a very important role in  
146 carditis severity and enhances bacterial clearance *in vivo*. We also show that there are

147 tissue-specific inflammatory transcriptional responses that correlate with increased  
148 macrophage infiltration in the absence of MyD88. Using an *ex vivo* murine macrophage  
149 system, we show that MyD88 signaling enhances, but is not required, for bacterial uptake  
150 or phagosomal maturation. Through RNA-sequencing analysis, we provide evidence that  
151 MyD88 signaling drives transcription of multiple genes involved in phagocytosis and  
152 identify potential intermediate proteins that facilitate the association between MyD88 and  
153 bacterial uptake. We also demonstrate that uptake of Bb by macrophages induces robust  
154 MyD88-independent inflammatory responses via phagocytosis-dependent production of  
155 chemokine proteins that can mediate cell recruitment to tissues. Our findings highlight the  
156 importance of MyD88 in efficient uptake of the Lyme disease spirochete by macrophages,  
157 and provide potential mechanistic insight into how MyD88 mediates this process.  
158

159 **RESULTS**

160

161 **MyD88 signaling significantly reduces bacterial load in tissues of Bb-infected mice.**

162 As previously stated, the macrophage is an essential cellular element of the human  
163 inflammatory response to the LD spirochete (7). Macrophages have also been shown as  
164 part of the inflammatory cell infiltrate in heart and joint tissue of mice experimentally  
165 infected with Bb (10, 39), and the importance of MyD88 in Bb clearance from mouse  
166 tissues has been previously reported (40-42). However, the effect of MyD88 signaling on  
167 macrophage-specific inflammation and spirochetal clearance has not been well  
168 characterized. To do so, we used a murine model of LD that enables investigation of the  
169 cell populations present in Bb-infected tissues, its transcriptional responses and bacterial  
170 clearance. For these experiments, we needle-inoculated WT and MyD88<sup>-/-</sup> mice on a  
171 C57BL/6 background with  $1 \times 10^5$  Bb and quantitated bacterial burdens in heart, tibiotarsal  
172 joints, patellofemoral joints, bladder, ear and skin tissues at 14-, 28- and 56-days post-  
173 infection (DPI). This expands on work done in prior studies by investigating burdens in  
174 multiple tissues at various time points. By 14 days, all experimentally infected mice had  
175 seroconverted (data not shown). In heart tissue, MyD88<sup>-/-</sup> mice showed significantly  
176 increased bacterial burdens compared to WT mice at 14 and 28 DPI (**Figure S1A**); this  
177 difference was not significant by 56 DPI. WT heart tissue showed decreased Bb burdens  
178 at each time point when compared to the other tissues analyzed (**Figure S1A**). In joint,  
179 bladder, ear and skin tissues, burdens in WT and MyD88<sup>-/-</sup> mice were comparable at 14  
180 DPI, but significantly higher in MyD88<sup>-/-</sup> mice at 28 and 56 DPI (**Figure S1B-F**).  
181 Interestingly, we saw a significant decrease in bacterial burdens in WT mice in all tissues  
182 except heart between 14 and 56 DPI (**Figure S1B-F**). Taken together, our results  
183 substantiate prior studies that MyD88 signaling is essential for Bb control; our results also  
184 show that, in heart tissue, MyD88-independent mechanisms can initiate effective, though  
185 delayed, bacterial clearance which could partially be macrophage mediated.

186

187 **Murine macrophages are a major component of heart inflammatory infiltrate**  
188 **independently of MyD88**



189 To determine whether MyD88 has an effect on macrophage-mediated inflammation in  
190 Bb-infected murine hearts, we first examined the cellular infiltrates at 14 and 28 DPI by  
191 hematoxylin and eosin (H&E) staining. The histopathology of infected hearts consisted of  
192 lymphocytes, plasma cells, macrophages, reactive mesothelial cells, and fibroblasts. In  
193 more intensely inflamed heart tissue, neutrophils were also a significant component of the  
194 cellular infiltrate (**Figure 1A**). Inflammation was primarily evident in connective tissue at  
195 the heart base, especially around the root of the aorta, and in the atrial epicardium with  
196 some involvement of the atrial myocardium, valve leaflets and ventricular epicardium (10,  
197 43, 44). Similar numbers of WT (2/5) and MyD88<sup>-/-</sup> (2/5) infected mouse hearts had  
198 evidence of low-grade inflammation (scores of 0-1) by 14 DPI (**Figure 1A and 1B**).  
199 Infected WT hearts showed stromal cell thickening at the base (**Figure 1A, top panels**),  
200 whereas a neutrophil infiltrate was clearly evident in the heart of one MyD88<sup>-/-</sup> infected  
201 mouse 14 DPI (**Figure 1A, inset**). Importantly, inflammation scores between the two  
202 genotypes were not significantly different at 14 DPI (**Figure 1B**). By contrast, at 28 DPI,  
203 the majority of MyD88<sup>-/-</sup> mice (4/5) showed significantly increased cellular infiltrates  
204 (**Figure 1C, bottom panels**) and higher inflammation scores than WT mice (**Figure 1D**).  
205 Hearts from MyD88<sup>-/-</sup> mice also revealed the presence of neutrophils (**Figure 1C, bottom**  
206 **panels and inset**), whereas WT mice did not. (**Figure 1C, top panels**). Because  
207 macrophages are not easily distinguishable by H&E staining, we performed  
208 immunohistochemistry (IHC) analysis for Iba-1, a calcium channel marker known to be  
209 expressed in macrophages (45). At 14 DPI, small numbers of macrophage clusters were  
210 observed in the heart base in WT mice (**Figure 1E, top left**), while no increase in  
211 macrophages was observed in MyD88<sup>-/-</sup> hearts 14 DPI (**Figure 1E, top right**). By  
212 contrast, 28 DPI MyD88<sup>-/-</sup> mouse hearts revealed a very dense macrophage infiltrate at  
213 the base (**Figure 1E, bottom right**), while minimal macrophage infiltrate was observed  
214 in WT hearts (**Figure 1E, bottom left**). To correlate cell infiltrate with an inflammatory  
215 response, we performed RT-PCR of the *Tnfa* gene from total RNA isolated from heart  
216 tissues from Bb-infected mice. As shown in **Figure 1F**, there was a significant decrease  
217 in *Tnfa* transcription between WT and MyD88<sup>-/-</sup> mice at 14 DPI, with WT hearts showing  
218 marked upregulation compared to uninfected WT controls. However, by 28 DPI *Tnfa*  
219 transcript levels were reduced in WT mice and comparable to those of MyD88<sup>-/-</sup> mice

220 **(Figure 1G)**. Taken together, our findings suggest that although infiltration into heart  
221 tissue is delayed, murine macrophages are still significant components of murine Lyme  
222 carditis in the absence of MyD88.

223  
224 **The absence of MyD88 affects expression of genes associated with inflammation**  
225 **but does not increase inflammation severity or infiltration of macrophages in joints.**

226 We performed similar analyses of patellofemoral joint tissue to evaluate macrophage  
227 responses in the absence of MyD88. Inflamed joints had small numbers of neutrophils,  
228 lymphocytes, plasma cells and macrophages (**Figure S2A and S2C**). Cellular infiltrates  
229 were most evident in the joint capsule near the junction with the periosteum. Prominent  
230 mixed infiltrates were also present in the periarticular loose connective tissue, especially  
231 in fat and along the periosteum, extending distal from the joint. A low-grade immune cell  
232 infiltrate was observed in most WT (3/5) and all MyD88<sup>-/-</sup> (5/5) mouse joints 14 DPI  
233 (**Figure S2A**). Similar to heart tissue, no differences in inflammation score between WT  
234 and MyD88<sup>-/-</sup> joints were observed 14 DPI (**Figure S2B**). The numbers of WT (3/5) and  
235 MyD88<sup>-/-</sup> (5/5) mice presenting with inflammation 14 DPI also were comparable (**Figure**  
236 **S2B**). In contrast to hearts, inflammation severity in joints was minimal to mild at 28 DPI  
237 in both genotypes, with no appreciable differences in the cell types present (**Figure S2C,**  
238 **bottom panels**). Inflammation scores also were comparable between WT and MyD88<sup>-/-</sup>  
239 mice; no significant difference in the number of mice showing inflammation was noted  
240 (WT = 2/5, MyD88<sup>-/-</sup> = 3/5) (**Figure S2D**). Using Iba-1 IHC, we visualized a few  
241 macrophages in the periarticular space in both WT and MyD88<sup>-/-</sup> mice 14 DPI (**Figure**  
242 **S2E, top panels**) and 28 DPI (**Figure S2E, bottom panels**). However, no difference in  
243 the number of macrophages was apparent between the two genotypes at the time points  
244 studied. There was also no difference in *Tnfa* transcript production at 14 DPI (**Figure S2F**)  
245 or 28 DPI (**Figure S2G**). This indicates that Bb induces tissue-specific inflammatory  
246 responses, even in the absence of MyD88 signaling.

247  
248 **MyD88-deficient macrophages show comparable binding but reduced uptake of Bb**

249 It has been well established that MyD88 enhances phagocytosis of multiple bacterial  
250 species by macrophages (28, 32, 34, 35, 46). To better understand the contribution of

251 MyD88 to spirochete binding, uptake and degradation by macrophages, we transitioned  
252 into an *ex vivo* macrophage model using WT and MyD88<sup>-/-</sup> BMDMs co-incubated with Bb  
253 at MOIs of either 10:1 or 100:1 for 1, 4 or 6 hours. To quantify binding percentages, we  
254 imaged a minimum of 100 cells by confocal microscopy and from the images determined  
255 the number of cells with spirochetes either attached to the surface or internalized (**Figure**  
256 **2A, yellow and white arrows respectively**). We used the same confocal images and  
257 total cell numbers to quantify uptake percentages based on the number of cells with  
258 internalized spirochetes. The percentages of cells with spirochetes either bound or  
259 internalized were comparable between WT and MyD88<sup>-/-</sup> BMDMs at all three time points  
260 irrespective of MOI (**Figure 2B and 2D**). While macrophages of both genotypes were  
261 able to phagocytose Bb, MyD88<sup>-/-</sup> BMDMs showed significantly reduced spirochete  
262 uptake compared to WT BMDMs (**Figure 2C**). Increasing the MOI to 100:1 significantly  
263 enhanced uptake in both cell genotypes, but MyD88<sup>-/-</sup> BMDMs never reached the  
264 phagocytic potential of their WT counterparts (**Figure 2E**). These results further support  
265 the necessity of MyD88 signaling for efficient phagocytosis of Bb, irrespective of contact  
266 time with the spirochete.

### 267 268 **TLR2, TLR7 and MyD88 are recruited to Bb-containing phagosomes in** 269 **macrophages**

270 Once spirochetes are phagocytosed by macrophages, recruitment of TLR and MyD88  
271 proteins to the phagosome is essential to trigger MyD88-dependent signaling cascades  
272 (47-50). Importantly, we have demonstrated that in human monocytes TLR2 and TLR8  
273 co-localize to endosomes containing Bb (19). In addition, other groups have shown a  
274 prominent role for TLR7 in the Bb inflammatory response (51). Murine TLR8, unlike  
275 murine TLR7 and human TLR8, does not seem to utilize ssRNA as its ligand (52). We  
276 therefore next characterized co-localization of TLR2, TLR7 and MyD88 with phagosomes  
277 containing Bb in BMDMs. By confocal microscopy, we showed that in WT BMDMs there  
278 is colocalization of MyD88 (**Figure 3A**), TLR2 (**Figure 3B**) and and TLR7 (**Figure 3C**)  
279 with Bb-containing phagosomes. Signals from MyD88 and TLR2 distinctly overlay with  
280 Bb GFP signals from phagosomes showing evidence of coiled or degraded spirochetes  
281 (**Figure 3A-B, graphs**), but the intensity of MyD88 or TLR2 signal observed was higher

282 with phagosomes containing degraded spirochetes. We also noted that TLR2 was  
283 expressed on the cell membrane and showed colocalization with surface-bound  
284 spirochetes (**Figure 3B**). TLR7 only showed strong signal with phagosomes containing  
285 partially degraded Bb but did not colocalize with surface-bound or recently internalized  
286 spirochetes (**Figure 3C**). In MyD88<sup>-/-</sup> BMDMs there is still colocalization of TLR2 with the  
287 phagosome (data not shown), but any TLR2 recruitment to the phagosome is not  
288 associated with pro-inflammatory signaling due to the lack of functional MyD88 protein  
289 (53). Taken together, these data confirm that endosomal TLR2, TLR7 and MyD88  
290 colocalize to Bb-containing phagosomes to facilitate recognition of bacterial ligands and  
291 early response to infection.

292

### 293 **Lack of MyD88 does not affect degradation of Bb in the phagosome**

294 Degradation of the spirochete in the phagosome is crucial to expose bacterial ligands for  
295 recognition by endosomal TLRs (17). This process, known as phagosome maturation,  
296 requires reduction of phagosome pH and fusion with lysosomes (54). Given that both WT  
297 and MyD88<sup>-/-</sup> BMDMs bind and internalize Bb, we next sought to determine if spirochetes  
298 are similarly degraded in phagosomes with and without MyD88. Confocal images taken  
299 after a 6-hour stimulation at MOI 10:1 showed that both WT and MyD88<sup>-/-</sup> BMDMs  
300 contained degraded GFP<sup>+</sup> Bb within the cell actin matrix (**Figure 4A and 4B**). To assess  
301 phagosome maturation, we quantitated recruitment of LAMP-1 to Bb-containing  
302 phagosomes by looking at colocalization of LAMP-1 and GFP fluorescence intensity (55).  
303 Both WT and MyD88<sup>-/-</sup> BMDMs showed comparable LAMP-1 and Bb colocalization in  
304 phagosomes (**Figure 4A and 4B, graphs**). Colocalization between Bb and LAMP-1 was  
305 measured in multiple phagosomes in BMDMs from both genotypes and no significant  
306 differences were found (**Figure 4C**). To confirm MyD88 signaling in response to Bb we  
307 also measured TNF $\alpha$  secretion after 1, 4 and 6 hours of incubation with spirochetes. WT  
308 BMDMs showed significant increase in TNF $\alpha$  secretion in the presence of spirochetes,  
309 while MyD88<sup>-/-</sup> BMDMs did not make TNF $\alpha$  protein (**Figure 4D**). MyD88<sup>-/-</sup> BMDMs also  
310 did not secrete IL-6, IL-12 or IL-10 (**Figure S3A-C**). Consistent with prior studies by  
311 Behera et al (2006), both WT and MyD88<sup>-/-</sup> BMDMs secrete the macrophage chemokine  
312 CCL2 (**Figure S3D**).

313

314 **Bb ligand recognition appears to occur solely from within the phagosome**

315 To test for the presence of bacterial products in the cytosol, we measured cleaved  
316 caspase-1, which is indicative of inflammasome activation. Western blot analysis of WT  
317 BMDM cell lysates and supernatants showed no activation of caspase-1 by stimulation of  
318 Bb alone (**Figure 4F**), which is consistent with previously published studies (56).  
319 However, in discordance with previous studies (57), we did not see cleavage of IL-1 $\beta$   
320 (**Figure 4F**) unless exogenous ATP was added to the stimulation. To further confirm lack  
321 of NLRP3 inflammasome activation, we assessed Apoptosis-associated speck-like  
322 protein containing a CARD (ASC) in BMDMs stimulated with either Bb or *Staphylococcus*  
323 *aureus* (Sa) for 30 minutes or 6 hours (**Figure S4**). As previously reported (58) (**Figure**  
324 **S4A and S4C**), ASC activation was observed with Sa, but no ASC was observed in  
325 BMDMs stimulated with Bb at 30 minutes or 6 hours (**Figure S4B and S4D**). Thus,  
326 recognition of Bb ligands appears to occur solely within the phagosome.

327

328 **MyD88-dependent signaling causes differential expression of genes in**  
329 **macrophages that promote the inflammatory response.**

330 Our results above emphasize the changes in inflammatory cell infiltrate and chemokine  
331 upregulation in tissues due to MyD88 signaling (**Figures 1 and S2**) and show that MyD88  
332 expression in macrophages enhances their capacity to phagocytose spirochetes (**Figure**  
333 **2**). To gain a better understanding of events that occur downstream of signaling by MyD88  
334 which result in this phenotype presentation, we performed RNA sequencing on WT and  
335 MyD88<sup>-/-</sup> BMDMs stimulated with Bb for 6 hours (**Figure S5**). This time point was also  
336 selected based on our data in **Figure 4** showing comparable maturation in both WT and  
337 MyD88<sup>-/-</sup> BMDM phagosomes. We sequenced RNA from WT BMDMs at a MOI of 10:1  
338 and MyD88<sup>-/-</sup> BMDMs at a MOI of 100:1 for a comparative analysis because the uptake  
339 percentages were not significantly different between the two cell phenotypes under these  
340 conditions (**Figure 5A**). Both WT and MyD88<sup>-/-</sup> BMDMs showed differentially expressed  
341 genes (DEGs) when compared to their respective unstimulated controls. We noted that  
342 the number of DEGs in WT BMDMs was much higher than in MyD88<sup>-/-</sup> BMDMs (2818  
343 genes vs 141 genes respectively) (**Figure 5B**). We saw similar numbers of up- and down-

344 regulated DEGs in WT BMDMs (**Figure 5B**). In the MyD88<sup>-/-</sup> BMDMs, approximately 83%  
345 of the DEGs were up-regulated (**Figure 5B**). We classified the DEGs into three categories  
346 for further analysis: genes differentially expressed only in WT BMDMs (MyD88-  
347 dependent); genes differentially expressed in both WT and MyD88<sup>-/-</sup> BMDMs (MyD88-  
348 independent); and genes that were differentially expressed only in MyD88<sup>-/-</sup> BMDMs  
349 (MyD88-privative) (**Figure 5C**).

350

351 Using these data, we performed a Gene Ontology (GO) enrichment analysis of each  
352 group of DEGs (**Supplemental File 1**). Because we showed above that in macrophages  
353 MyD88 affects both the inflammatory response and uptake of spirochetes we focused on  
354 biological processes relating to inflammation and phagocytosis in the MyD88-dependent  
355 DEGs. Multiple inflammatory biological processes were enriched (see supplemental files)  
356 but we concentrated on five processes with high numbers of gene hits: (i) Positive  
357 Regulation of Immune System Process, (ii) Positive Regulation of Cytokine Production,  
358 (iii) Immune System Process, (iv) Immune Response and (v) Defense Response. The  
359 MyD88-dependent DEG GO analysis resulted in the DEGs being broadly characterized  
360 into two different subsets. The first is comprised of DEGs enriched in all or almost all five  
361 processes and includes classic inflammatory genes, such as *Il6*, *Il12b*, *Il1b*, *Il23a* and *Tlr9*  
362 (**Figure 5D**). The second is comprised of DEGs that were enriched in only one or two of  
363 the five biological processes (**Figure 5D**). Examples of these DEGs included *Prdm1*  
364 (Positive Regulation of Immune System Process), which is involved in suppression of  
365 IFN- $\beta$  production (59) and *Il17ra* (Positive Regulation of Cytokine Production), which  
366 facilitates the differentiation of neutrophils in response to IL-17 (60). The MyD88-  
367 independent DEGs also significantly enriched to the same five biological processes in  
368 their GO analysis but had fewer numbers of hits for each process (**Supplemental File 4**).  
369 The GO analysis of the MyD88-privative genes also showed significant enrichment to four  
370 of these inflammatory processes; Positive Regulation of Cytokine Production was not  
371 enriched in the MyD88-privative DEGs (**Supplemental File 4**). Overall this analysis  
372 indicates that MyD88 signaling results in activation of many processes and cellular  
373 elements that affect inflammation.

374



375 **Multiple genes associated with biological processes involved with phagocytosis**  
376 **are MyD88-dependent.**

377 Based on our observation that the presence of MyD88 enhances phagocytosis (**Figure**  
378 **2**), we also analyzed whether any of the MyD88-dependent DEGs enriched to biological  
379 processes related to uptake. We identified 164 MyD88-dependent DEGs that enriched to  
380 five different biological processes relating to phagocytosis (Actin Filament Polymerization,  
381 Regulation of Cell Shape, Actin Cytoskeleton Organization, Cytoskeleton Organization,  
382 and Actin Filament Organization) (**Figure 5E**). Of particular interest, *Daam1* and *Fmnl1*,  
383 encoding two proteins known to play a role in phagocytosis of Bb (15, 37), were  
384 differentially expressed in an MyD88-dependent manner (**Supplemental File 3**). *Daam1*,  
385 which was upregulated, is a formin protein that bundles actin fibers together to increase  
386 stability of coiling pseudopods, which are more adept at capturing the highly motile  
387 spirochetes (61). *Fmnl1*, which was down-regulated, is also a formin protein that severs  
388 actin branches to promote polymerization and increase filopodia protrusion (61). To better  
389 understand how these genes relate to other genes commonly associated with  
390 phagocytosis, and to understand which pathways are turned on or off, we first separated  
391 the 164 genes into two groups based on upregulation or downregulation. We then entered  
392 the list of genes from each group into the GeneXplain software to map interactions among  
393 the proteins they encode. Pathways including the uptake genes with up to 10  
394 intermediates between them were computed. Because *Daam1* and *Fmnl1* have been  
395 previously implicated in phagocytosis of Bb, we then merged all pathways that included  
396 either *Daam1* or *Fmnl1* into protein interaction networks (**Figure 6**). The network  
397 mapping *Daam1* chains (**Figure 6A**) shows related pathways that are upregulated and  
398 includes *Rhoa*, *Akt1*, *Rac1* and *Cdc42* as genes that code for proteins which appear as  
399 intermediates on the network, meaning that their genes weren't differentially expressed  
400 in our analysis. (**Figure 6A, red boxes**). *Daam1* regulates *Rhoa* activity, which controls  
401 *Cdc42*, *Rac1* and *Akt1*. *Cdc42* activates a Rho GTPase, *Rhoq*, which is upregulated in  
402 response to Bb. *Rac1* and *Akt1*, when translated, both activate multiple proteins whose  
403 corresponding genes are also upregulated, indicating that while the genes for these  
404 intermediate proteins aren't differentially expressed, they are still active in macrophages  
405 that have been stimulated with Bb. In contrast to *Daam1*, *Fmnl1* was downregulated in

406 response to Bb. The network mapping *Fmn1* chains (**Figure 6B**) also highlights other  
407 pathways and genes that are downregulated. This network also includes the genes *Cdc42*  
408 and *Akt1* which code for intermediate proteins. However, the network shows that the  
409 genes which code for proteins that inactivate *Cdc42* and *Akt1* are being downregulated  
410 in an MyD88-dependent manner. The downregulation of these inhibitors indicates that  
411 the activity of these proteins is important in the macrophage response to Bb, consistent  
412 with the *Daam1* network above. Taken together, these data suggest that MyD88 signaling  
413 upregulates multiple gene products involved in regulating macrophage membrane  
414 protrusions. Upregulation of these genes likely contributes to the reorganization of cell  
415 machinery that enhances the capability of the WT macrophage to take up spirochetes.

416

417 **Similar inflammatory and chemotactic processes are enriched regardless of**  
418 **MyD88-mediated signaling, but utilize different regulatory proteins**

419 MyD88-dependent mechanisms of inflammation have been well characterized, but little  
420 work has been done to understand the drivers of Bb-induced inflammation in the absence  
421 of MyD88. To address this issue, we next completed a comprehensive analysis to  
422 determine how the DEGs are regulated within Bb-infected macrophages, both in the  
423 presence or absence of MyD88. We first identified transcription factors with potential  
424 binding sites in the promoter regions of the DEGs for each of the three subsets (66 for  
425 MyD88-dependent, 201 for MyD88-independent, and 39 for MyD88-privative). We then  
426 identified master regulator proteins upstream of these transcription factors and performed  
427 a GO enrichment analysis using the same parameters described in **Figure 5**. The  
428 enrichment analysis of MyD88-independent master regulators revealed processes  
429 involved in cell metabolism and homeostasis, which did not give much insight into  
430 differences in mechanisms of inflammation driven by the presence or absence of MyD88.  
431 Therefore, we focused on analysis of MyD88-dependent and MyD88-privative master  
432 regulators. In light of our findings that Bb-infected MyD88-/- mice showed increased  
433 macrophage and neutrophil infiltrate in heart tissue (see **Figure 1**), we investigated  
434 whether any master regulators enriched to inflammatory and/or chemotactic biological  
435 processes. Interestingly, similar biological processes significantly enriched in  
436 inflammation were both identified in the MyD88-dependent (including *MyD88*, *Irak2* and



437 *Ly96*) and MyD88-privative (including *Vcam1* and *Cxcl2*) master regulators (**Figure 7A**  
438 **and 7C**), but the individual master regulators involved were different for each subset  
439 (**Figure 7A**). Importantly, over three times as many master regulators were identified for  
440 the MyD88-dependent DEGs than the MyD88-privative DEGs (**Figure 7A**), suggesting  
441 that MyD88 signaling controls activation of more master regulators in the cell to initiate  
442 DEGs (see **Figure 5**) and enables the cell to perform unique processes in response to  
443 Bb.

444

445 **MyD88 is a master regulator for transcription factors that control the MyD88-**  
446 **dependent DEGs enriched in uptake processes.**

447 To better understand the phenotypic differences related to phagocytosis between the two  
448 genotypes (see **Figure 2**), we identified transcription factors that map to promoter regions  
449 of DEGs related to phagocytosis. We then used OCSANA in Cytoscape to link MyD88  
450 (as a master regulator) with transcription factors that map to DEGs in this specific subset.  
451 Of these transcription factors, three were expressed exclusively in WT BMDMs; *Zic1*,  
452 *Zeb1* and *Gata3*. Based on this information we constructed a network illustrating potential  
453 links between MyD88-mediated signaling and enhanced phagocytic capability seen in WT  
454 cells (**Figure 7E**). Analysis of these transcription factors revealed that *Zic1*, *Zeb1* and  
455 *Gata3* have the capacity to bind to the promoter regions of several of the MyD88-  
456 dependent DEGs that significantly enriched to processes associated with bacterial  
457 uptake. *Zic1* is controlled by the intermediate protein ApoE, which is known to play a role  
458 in cholesterol metabolism in macrophages (62) and the absence of ApoE increases Bb  
459 burdens in experimentally infected mice (62).

460

461 **MyD88-privative master regulators are involved in multiple chemotactic biological**  
462 **processes not enriched in WT BMDMs.**

463 We also observed significant overlap between the chemotactic biological processes  
464 enriched in MyD88-dependent and MyD88-privative master regulators. However, MyD88-  
465 privative master regulators significantly enriched to multiple biological processes involved  
466 in chemotaxis that were not enriched in MyD88-dependent master regulators (**Figure 7B**  
467 **and 7D**), suggesting that the lack of MyD88 signaling allows for increased up-regulation

468 of processes to facilitate cell migration into the tissues. The MyD88-privative master  
469 regulators involved in these chemotactic processes also enriched to inflammatory  
470 processes (**Figure 7**), suggesting that Bb may trigger other signaling cascades which  
471 induce inflammation more skewed to cell recruitment and localization. We then generated  
472 a network of two MyD88-privative master regulators that were up-regulated and  
473 significantly enriched to multiple chemotactic biological processes (**Figure 7F**).  
474 Interestingly, *Cxcl2* was differentially expressed in the absence of MyD88 and also  
475 mapped as a master regulator in the network. Most importantly, both networks shown in  
476 **Figure 7E and 7F** provide potential targets for knock-out studies to test if they contribute  
477 to inflammation in humans.

478

479 **The absence of MyD88 drives unique chemokine transcript expression profiles in**  
480 **heart tissue during Bb infection.**

481 The analysis of RNA-sequencing data revealed that expression of several chemokines  
482 was MyD88-independent. To determine whether these chemokines were expressed in  
483 the absence of MyD88 *in vivo*, we performed RT-PCR of the chemokine genes from total  
484 RNA isolated from heart and patellofemoral joint tissues from Bb-infected mice (*Ccl2*,  
485 *Ccl9*, *Cxcl2*, *Cxcl3*, *Cxcl10*). *Ccl2* and *Ccl9* are macrophage-specific chemokines (63).  
486 Significant transcriptional differences between WT and MyD88<sup>-/-</sup> mice were seen 14 and  
487 28 DPI (**Figure S6**). WT hearts showed marked upregulation of all chemokines tested at  
488 14 DPI in comparison to uninfected WT controls, with the exception of *Ccl2* (**Figure S6A**).  
489 In contrast to WT mice, *Ccl9*, *Cxcl2*, *Cxcl3* and *Cxcl10* were down-regulated in MyD88<sup>-/-</sup>  
490 infected hearts at 14 DPI compared to uninfected controls (**Figure S6**). However, at 28  
491 DPI *Ccl9* was upregulated in MyD88<sup>-/-</sup> heart tissue, but down-regulated in WT hearts  
492 (**Figure S6C**). In joint tissue MyD88<sup>-/-</sup> mice did not show any significant upregulation of  
493 chemokines 14 DPI, but *Ccl2*, *Cxcl2*, *Cxcl3* and *Cxcl10* were up-regulated 28 DPI (**Figure**  
494 **S6**) These chemokine transcripts were downregulated in WT mice 28 DPI. Interestingly,  
495 *Cxcl2* and *Cxcl10* were not significantly upregulated in heart tissue at the same time point  
496 (**Figure S6**). These chemokines have high affinity for the IL-8 receptor (64), and may  
497 facilitate recruitment of other inflammatory cells (other than macrophages) to joint tissue  
498 in the absence of MyD88. Overall, these data suggest that in the absence of MyD88, cells

499 in heart tissue show different inflammatory gene expression in response to Bb, with  
500 increased production of select chemokines that can facilitate macrophage recruitment.  
501

502 **DISCUSSION**

503

504 Previous studies by our group have emphasized that uptake and degradation of Bb by  
505 phagocytic cells, including monocytes and macrophages, are critical in eliciting the  
506 inflammatory response to the bacterium (14, 17-19, 29). The findings from these studies,  
507 as well as others (28), show that the adaptor protein MyD88 plays a critical role in bacterial  
508 uptake and phagosomal signaling in macrophages. In the current study, we provide  
509 further evidence that the macrophage is a key driver of inflammation, even in the absence  
510 of MyD88. We also show that while MyD88 has a significant impact on spirochetal uptake,  
511 phagosome maturation and bacterial degradation are not affected. Of particular novelty,  
512 phagosomal signaling cascades induced by Bb ligands in macrophages trigger a number  
513 of inflammatory and chemotactic pathways. Moreover, the inflammatory processes are  
514 mediated by different regulatory proteins depending on whether MyD88 is present or  
515 absent, while induction of several chemotactic processes occurs independently of  
516 MyD88. In-depth analysis of these signaling cascades allowed us to identify previously  
517 underappreciated MyD88-dependent master regulators and transcription factors which  
518 can lead to enhanced spirochetal uptake and clearance.

519

520 The importance of MyD88 signaling in Bb clearance from infected murine tissues is well  
521 recognized (40-42), but the tissue specific kinetics of spirochetal clearance have not been  
522 fully defined. In the current study, we quantified Bb burdens in multiple tissues at early  
523 (14 DPI), intermediate (28 DPI) and late (56 DPI) time points post-infection to more fully  
524 establish bacterial clearance kinetics and how the rate of clearance is affected by the  
525 presence of MyD88. As in these prior studies, our results (see **Figure S1**) confirm that  
526 MyD88 signaling in Bb-infected mice affects spirochete clearance. In contrast to prior  
527 work (42), we did not observe significant differences in spirochete burdens at 14 DPI. In  
528 bladder, skin, ear, and joint tissue the lack of MyD88 results in persistent Bb burdens that  
529 remain elevated even 56 DPI. Given that there was a reduction in Bb burdens in MyD88-  
530 *-* mouse hearts 56 DPI, we postulate that MyD88 signaling in macrophages is a necessity  
531 for early control of Bb burdens in heart tissue, The significant decrease in Bb burdens in  
532 MyD88-*-* murine heart tissue by 56 DPI, but not in other tissues taken from the same

533 mouse, indicates that tissue-specific inflammatory responses dependent on MyD88  
534 signaling can impact spirochete clearance.

535

536 Bb-induced tissue-specific differences in inflammation severity and types of cell infiltrate  
537 in the mouse model of infection have been reported in prior studies (5, 6, 40, 41, 44, 65,  
538 66). . Inflammation in mouse joint tissue is more neutrophilic (40), while heart  
539 inflammation is more macrophage-driven (10). In this study we focused on  
540 characterization of inflammatory macrophages because of their role in early recognition  
541 and clearance. Interestingly, our studies show that heart tissue in MyD88<sup>-/-</sup> mice had  
542 significantly more inflammation and macrophage infiltrate 28 DPI than Bb-infected WT  
543 hearts (**Figure 1**). These findings suggest that MyD88 is not required for immune cell  
544 recruitment since macrophage-specific chemokine transcript is significantly upregulated  
545 and macrophages readily appear in infected heart tissue despite the lack of MyD88  
546 signaling. Whether MyD88 signaling affects other factors necessary for macrophage  
547 recruitment, such as integrin expression, has not been studied. Lack of  $\beta$ 2/CD18 integrin  
548 expression increases inflammation severity (11), and lack of CD11a increases bacterial  
549 burdens in the heart (67, 68). Our results also suggest that macrophages are not the only  
550 cell driving spirochete clearance *in vivo*. Infected MyD88<sup>-/-</sup> mouse hearts showed  
551 significant neutrophil infiltration 28 DPI, greater than WT mice, suggesting that, similar to  
552 joints, neutrophils also play a role in chemokine production and Bb clearance in the heart  
553 (69, 70). Whether MyD88 signaling affects the ability of neutrophils to efficiently capture  
554 spirochetes is not known. Taken together, our *in vivo* Bb infection studies reveal that, in  
555 heart tissue, the absence of MyD88 signaling results in recruitment of more phagocytic  
556 cells (i.e. macrophages and neutrophils) and suggest that these cells still play an  
557 important role in controlling bacterial loads despite their diminished ability to take up  
558 spirochetes.

559

560 To better understand the contribution of MyD88 to spirochete binding, uptake,  
561 degradation and signaling by macrophages, we transitioned to an *ex vivo* model. Murine  
562 macrophages lacking MyD88 show a phagocytic defect when stimulated with Bb *ex vivo*  
563 compared to WT macrophages. This defect in uptake has been previously demonstrated

564 in macrophage stimulation experiments with other bacteria strains (31, 34, 35, 38). Our  
565 results reveal that binding of Bb is not affected and that this phagocytic defect is not  
566 dependent on length of stimulation (i.e. time dependent) and is only slightly rescued by  
567 increasing the MOI. Thus, in the absence of MyD88, macrophages are still capable of  
568 binding and taking up the LD spirochete, but MyD88 signaling enhances the efficiency of  
569 Bb phagocytosis by macrophages. We also show here that when stimulated *ex vivo*, the  
570 macrophage response to Bb is driven by the signaling cascades induced by MyD88 as a  
571 result of bacterial ligands engaging TLR2 and TLR7 receptors in the phagosome.  
572 Recognition in the phagosome is driven by degradation of bacteria, since more TLR2,  
573 TLR7 and MyD88 marker intensity were observed colocalizing with degraded spirochetes.  
574 Our results in **Figure 4** indicate that in the context of Bb infection, MyD88 is not required  
575 for phagosome maturation, evidenced by the recruitment of LAMP-1 to Bb-containing  
576 phagosomes in MyD88<sup>-/-</sup> BMDMs. This is in contrast to Blander *et al.*, who published that  
577 MyD88<sup>-/-</sup> BMDMs infected with *S. aureus* or *E. coli* did not colocalize with either  
578 LysoTracker or LAMP-1 to the same degree as WT BMDMs (38). One possible  
579 explanation for the different findings with our study is that the recruitment of LAMP-1 is  
580 delayed in MyD88<sup>-/-</sup> BMDMs, given that Blander *et al.* measured phagosome maturation  
581 at an earlier time point than in our studies. This explanation is supported by Yates *et al.*  
582 who showed slightly delayed acidification in MyD88<sup>-/-</sup> BMDMs stimulated with TLR2 or  
583 TLR4 ligands for 40 minutes (46). The fragility of the Bb membranes also suggests that  
584 perhaps less acidification of the phagosome is needed to expose Bb PAMPs.

585  
586 Reduced uptake of bacteria in macrophages lacking MyD88 is a phenotypic trait that has  
587 been extensively detailed (28, 31-35), but not well-understood. To better understand the  
588 relationship between MyD88 signaling and phagocytosis, we used a computational  
589 systems biology approach. In prior studies, addition of TLR3 ligands to Bb stimulation of  
590 MyD88<sup>-/-</sup> BMDMs significantly rescues uptake (36), suggesting that in the absence of  
591 MyD88 TRIF signaling can activate pathways that result in similar actin rearrangement in  
592 the cell. This signaling was shown to be mediated through PI3K (36), but interestingly  
593 PI3K was not differentially expressed in our macrophage stimulation. However, our  
594 network analysis from RNA-sequencing data identified DEGs that are upregulated

595 downstream of common phagocytosis effector proteins. *Rhoq*, activated by *Cdc42* codes  
596 for TC10, a protein involved in generating long filopodia protrusions (71). The gene  
597 *Cyfp1*, which encodes a part of the WAVE complex that regulates actin polymerization  
598 (72), was also upregulated according to the network through *Rac1* protein interactions.  
599 The WAVE complex has higher involvement with lamellipodia formations (73). It is likely  
600 that MyD88 controls transcription factors that upregulate these genes to promote  
601 phagocytosis through formation of coiling pseudopods, which are more similar to  
602 lamellipodia, rather than through straight filopodia protrusions. In addition to MyD88,  
603 studies indicating that TLR2 can utilize TRIF have also been completed, but this  
604 interaction only appears to contribute to the inflammatory response rather than spirochete  
605 uptake (18, 74). More recently, the leukotriene LTB<sub>4</sub> has been shown to promote  
606 phagocytosis of Bb by macrophages (75), but in our BMDM sequencing data we did not  
607 find differential expression of *Ltb4* or its receptor *Ltb4r1*. This could possibly be due to the  
608 later time point we selected for sequencing. It has also been shown that spleen tyrosine  
609 kinase (Syk) has an important role in phagocytosis of Bb via integrin binding (76). The  
610 Syk gene (*Syk*) is significantly upregulated in an MyD88-dependent manner, suggesting  
611 that MyD88 drives over-expression of *Syk* to increase phosphorylation and activation of  
612 proteins involved in generating actin branches. However, in our GO analysis *Syk* was not  
613 one of the 164 MyD88-dependent genes that enriched to uptake biological processes,  
614 and the transcription factor *Zic1*, which has binding sites in the promoter regions of a  
615 significant number of these genes, is not predicted to bind in the promoter region of *Syk*.  
616 *Zic1* was of particular interest to us because it appeared downstream of MyD88 in our  
617 network analysis (**Figure 6**) and is controlled by the intermediate protein ApoE. Mice  
618 lacking ApoE have increased bacterial burdens when infected with Bb (62), suggesting  
619 that ApoE signaling plays a role in cell remodeling processes necessary to enhance  
620 uptake. In addition, a link between Bb phagocytosis and cholesterol has been postulated  
621 by Hawley *et al.* who showed that CR3, a known phagocytic receptor for Bb, is recruited  
622 to lipid rafts with the co-receptor CD14 (77). Thus, it is possible that MyD88 upregulates  
623 ApoE to enhance lipid rafts on the macrophage membrane, which can potentiate signaling  
624 to enhance uptake and provide scaffolding for proteins involved in actin remodeling.

625



626 Our computational analysis also supported that there are non-canonical sources of  
627 inflammation in MyD88<sup>-/-</sup> mice. Our results suggest that there is possibly another receptor  
628 recruited to the phagosome that initiates chemokine production upon recognition of a Bb  
629 ligand (see **Figure S6**). Another mechanism for triggering chemokine production may be  
630 that the TLR receptors are utilizing another adaptor protein to transmit signals out of the  
631 phagosome, as postulated by Petnicki-Ocwieja *et al.* (74). The production of chemokines  
632 facilitates recruitment of cells to spirochetes infected tissues, but the increased cell  
633 recruitment in MyD88<sup>-/-</sup> mice, coupled with higher Bb burdens suggests that the  
634 infiltrating immune cells are not efficient at clearing spirochetes. We hypothesize that in  
635 order to compensate for their lack of efficiency at uptake, more cells need to be recruited.  
636 This progression of events may not be true for joint compared to heart tissue, since our  
637 results show that the chemokine responses are different in each tissue. Network analysis  
638 of DEGs from macrophages identified multiple master regulators that could be controlling  
639 production of these chemokines, but further work needs to be done to determine if these  
640 master regulators are in fact active in macrophages containing Bb. Additional studies to  
641 test whether acidification of the phagosome is required for Bb-induced chemokine  
642 production will also give insight into which ligand-receptor interaction induces this  
643 response.

644

645 In summary, our results emphasize that the macrophage has a very important role in both  
646 recognition and clearance of Bb and is at the epicenter of the immunologic response to  
647 spirochete infection, particularly in relation to Lyme carditis. The findings from these  
648 studies have also advanced our understanding of how phagosomal signaling drives  
649 spirochete uptake, recognition and inflammation. The adaptor protein MyD88 plays a  
650 critical role in these processes. Initial phagocytosis of Bb by macrophages does not  
651 require MyD88, but once taken up, recognition of Bb ligands exposed upon spirochete  
652 degradation occurs through endosomal TLRs which trigger MyD88-mediated signaling  
653 cascades. This signaling results in cell remodeling to enhance phagocytosis, as indicated  
654 by our *ex vivo* data, and allows macrophages to more efficiently internalize and clear the  
655 highly motile spirochetes by using more dynamic membrane protrusions. Further studies  
656 using the targets identified in these experiments may also provide insight into



657 understanding the importance of phagocytosis in other bacterial infections. We can use  
658 similar techniques to look at the role of the macrophage response and MyD88 signaling  
659 in human macrophages, with the goal of increasing our understanding of the clinical  
660 spectrum associated with Lyme disease pathogenesis.

661 **MATERIALS AND METHODS**

662

663 **Mice:**

664 Female 6-8-week-old C57BL/6J wild type (WT) and C57BL/6J MyD88<sup>-/-</sup> (MyD88<sup>-/-</sup>) mice  
665 used in these studies were obtained from breeding colonies maintained in the UConn  
666 Health (UCH) Center for Comparative Medicine facility according to guidelines set by the  
667 UCH Institutional Animal Care and Use Committee. Original WT breeding pairs were  
668 purchased from The Jackson Laboratory (Bar Harbor, Maine). Original MyD88<sup>-/-</sup> breeding  
669 pairs were kindly provided by Dr. Egil Lien at the University of Massachusetts with  
670 permission from Dr. S. Akira in Osaka, Japan. Disruption of the murine MyD88 gene was  
671 confirmed through PCR (53). Both WT and MyD88<sup>-/-</sup> breeding colonies are maintained  
672 on the antibiotic Sulfatrim (sulfomethoxazole [40 mg/mL] + trimethoprim [8 mg/mL])  
673 diluted in water 1:50, which has been previously shown to not impact the degree of Bb  
674 infection (42).

675

676 **Ethics Statement:**

677 All experiments in this work involving the use of animals or isolation of primary cells  
678 from animals were monitored and approved by the UConn Health Institutional Animal  
679 Care and Use Committee under protocol #101388-0819. The UConn Health Institutional  
680 Animal Care and Use Committee is accredited by The Association for Assessment and  
681 Accreditation of Laboratory Animal Care (AAALAC).

682

683 **Bacterial Strains:**

684 Low-passage virulent wild-type strain 297 (78) or a strain 297 isolate containing a stably-  
685 inserted copy of green fluorescent protein (GFP) under the control of the constitutively-  
686 expressed *flaB* promoter (Bb914) (79) were maintained in Barbour-Stonner-Kelly (BSK)-  
687 II media supplemented with normal rabbit serum and gentamicin (50 µg/µl) (79). Cultures  
688 were grown at 23°C for at least one week prior to being shifted to 37°C as previously  
689 described (79). Spirochetes were centrifuged at 3300 x g for 20 minutes at 4°C and  
690 resuspended in either BSK-II for *in vivo* experiments or DMEM (Gibco, 15630-080)  
691 supplemented with sodium pyruvate (Gibco, 11360-070) and HEPES (Gibco, 15630-080)

692 for *ex vivo* experiments. After resuspension, the cultures were counted by dark-field  
693 microscopy using a Petroff-Hausser counting chamber (Hausser Scientific) and diluted  
694 accordingly. *Staphylococcus aureus* (Sa) was cultured and fluorescently labeled with  
695 FITC as previous described (80).

696

#### 697 **Mouse Infection:**

698 Sex- and age-matched WT and MyD88<sup>-/-</sup> mice were used in every experiment. Mice were  
699 injected intra-dermally on their backs with either 1 x 10<sup>5</sup> temperature-shifted Bb diluted in  
700 50 µL BSK-II or sham-inoculated with an equal volume of media alone and then sacrificed  
701 14-, 28- or 58-days post-infection. Infection was confirmed at 2 weeks post-infection by  
702 serology and culturing of ear tissue in BSK-II. Cultures were examined weekly for  
703 spirochetes by darkfield microscopy for at least 4 weeks. Serum was tested against Bb  
704 protein lysates via chemiluminescent immunoblot using goat anti-mouse HRP-conjugated  
705 IgG (GE NA931) as previously described (81).

706

#### 707 **Quantitation of Bb Burdens in Mouse Tissues:**

708 Mouse heart, tibiotarsal joint, patellofemoral joint, bladder, abdominal skin, and ear  
709 tissues were harvested at the time of sacrifice. Tissues were digested overnight in 0.1%  
710 collagenase Type I in PBS (Gibco, 17100-017) at 37°C, then further digested with 0.2  
711 mg/mL proteinase K solution (200 mM NaCl, 20 mM Tris-HCl pH 8.0, 50 mM EDTA, 1%  
712 SDS, 0.2 mg/mL proteinase K (Machery-Nagel, 740506) in dH<sub>2</sub>O) overnight at 56°C. DNA  
713 from a small volume of digested tissue was isolated using a genomic DNA purification kit  
714 (Machery-Nagel, 740952) according to manufacturer's instructions. Spirochete burdens  
715 were quantitated by qPCR using TaqMan-based assays for Bb *flaB* and murine nidogen  
716 (*nido*). The primers and probe used to detect *flaB* were *flaB*-F (5-  
717 CTTTTCTCTGGTGAGGGAGCTC-3') and *flaB*-R (5'-GCTCCTTCCTGTTGAACACCC-  
718 3') and *flaB*-probe (5'-FAM-CTTGAACCGGTGCAGCCTGAGCA-3'-BHQ1). The primers  
719 and probe used for *nidogen* were *nidogen*-F (5'-CCCCAGCCACAGAATACCAT-3'),  
720 *nidogen*-R (5'-AAAGGCGCTACTGAGCCGA-3'), and *nidogen*-probe (5'-FAM-  
721 CCGGAACCTTCCCACCCAGC-3'-BHQ1). The copy numbers for *flaB* and *nidogen*  
722 genes were calculated by the Bio-Rad software (version 3.1) based on standard curves

723 ( $10^7 - 10^2$  copies) generated from cloned versions of the corresponding amplicon (82,  
724 83). *flaB* copy numbers were normalized to copies of *nidogen*. General statistical analysis  
725 was performed using GraphPad Prism 4.0 (GraphPad Software, San Diego, CA), using  
726 an unpaired Student *t* test. For each experiment, both the standard deviation and the  
727 standard error of the mean were calculated. *p* values of <0.05 were considered significant.

728

### 729 **Histopathology:**

730 Mouse patellofemoral joints and hearts were fixed for one week in 10% buffered formalin.  
731 Joints were decalcified for 48 hours after fixation. Tissues were then embedded in paraffin  
732 and 5  $\mu$ m sections were floated onto glass slides using a 40°C water bath. Tissues were  
733 stained in hematoxylin solution for 90 seconds and Eosin Y solution for 18 seconds. Joints  
734 were scored on a scale of increasing severity from 1-3 by a pathologist in a blinded  
735 fashion for arthritis severity. Hearts were scored on a scale of increasing severity from 1-  
736 3 by a pathologist in a blinded fashion according to type and amount of cell infiltrate.  
737 General statistical analysis was performed using GraphPad Prism 4.0 (GraphPad  
738 Software, San Diego, CA), using an unpaired Student *t* test. For each experiment, both  
739 the standard deviation and the standard error of the mean were calculated. *p* values of  
740 <0.05 were considered significant.

741

### 742 **qRT-PCR Analysis of Infected Mouse Tissues:**

743 Mouse patellofemoral joints and hearts were homogenized using an electric homogenizer  
744 with toothed blades in tissue lysis buffer (Machery-Nagel, 740962) containing beta-  
745 mercaptoethanol (1:100) (Bio-Rad, 161-0710) and Triton-X-100 (1:100) (Fisher, BP151-  
746 100). RNA was isolated from tissue lysates using a Nucleospin RNA Kit (Midi column,  
747 Machery-Nagel, 740962) according to the manufacturer's fibrous tissue protocol. RNA  
748 was quantified using a Nanodrop spectrometer (Thermo-Fisher). cDNA was generated  
749 from 2.5 nanograms total RNA using a high capacity cDNA RT kit (Applied Biosystems,  
750 4368814) according to manufacturer's instructions. Gene-specific qRT-PCR analyses  
751 were performed as previously described (29). Expression levels for *Aif1*  
752 (Mm00479862\_g1), *Casp1* (Mm00438023\_m1), *Ccl2* (Mm00441242\_m1), *Ccl9*  
753 (Mm00441260\_m1), *Cxcl10* (Mm99999072\_m1), *Cxcl2* (Mm00436450\_m1), *Cxcl3*

754 (Mm01701838\_m1), *Ifnb* (Mm00439546\_s1), *Il12a* (Mm00434169\_m1), *Il1b*  
755 (Mm01336189\_m1), *Il6* (Mm00446190\_m1), *Itgam* (Mm00434455\_m1), *Mmp9*  
756 (Mm00442991\_m1), *Ncf2* (Mm00726636\_s1), *Nlrp3* (Mm00840904\_m1), *Nod2*  
757 (Mm00467543\_m1), and *Tnfa* (Mm00443258\_m1) were normalized to *B2m*  
758 (Mm00437764\_m1) and the fold changes in gene expression relative to the unstimulated  
759 or uninfected control were calculated using the  $2^{-\Delta\Delta Ct}$  method (84).

760

#### 761 **BMDM Stimulation:**

762 Bone marrow-derived macrophages (BMDMs) were isolated from 6-8-week-old WT and  
763 MyD88<sup>-/-</sup> mice as described previously (18). Single cell macrophage suspensions were  
764 seeded into either 12-well tissue culture-treated plates at a concentration of  $1 \times 10^6$   
765 cells/ml per well or  $1 \times 10^5$  cells/500  $\mu$ L per well in 8-chamber cell microscopy slides.  
766 Slides and plates were then incubated overnight at 37°C/5% CO<sub>2</sub> to allow cell adherence  
767 before experimentation. Cells were incubated for either 0.5, 1, 4 or 6 hours at 37°C/5%  
768 CO<sub>2</sub> with live GFP-Bb or labeled Sa at multiplicities of infection (MOIs) of either 10 or 100.  
769 Stimulation media was DMEM supplemented with 1% sodium pyruvate and 1% HEPES.  
770 For stimulations looking at the effect of Bb uptake, Cytochalasin D (Sigma, C8273-1MG)  
771 was added to wells at a concentration of 10  $\mu$ g/mL and incubated at 37°C for 1 hour  
772 before Bb. At the end of the incubation period, culture supernatants were collected and  
773 stored at -80°C until cytokine analysis. Cells stimulated in chamber slides were  
774 processed for confocal microscopy. Cells stimulated in 12-well plates were processed for  
775 RNA extraction. All culture media and reagents were confirmed free of LPS contamination  
776 (<10 pg/ml) by Limulus amoebocyte lysate assay quantification (Cambrex, MA).

777

#### 778 **Confocal Microscopy:**

779 After stimulation, BMDMs were fixed in 2% paraformaldehyde with 0.05% Triton-X-100  
780 (Fisher, BP151-100) for 10 minutes. Slide wells were then incubated with 5% bovine  
781 serum albumin (BSA) solution in PBS overnight at 4°C to block non-specific antibody  
782 binding. The next day, cells were stained with different combinations of anti-GFP (Thermo  
783 Scientific A-21311, 1:100), phalloidin conjugated with Alexa Fluor 647 (Biolegend 424205,  
784 1:20), anti-MyD88 (Santa Cruz 11356, 1:100), anti-TLR2 (eBioscience 14-9021-82,

785 1:100), anti-TLR7 (R&D MAB7156, 1:100), anti-ASC (Santa Cruz 22514-R, 1:100) and  
786 anti-LAMP-1 (eBioscience 14-1071-82, 1:100). A secondary antibody was used to detect  
787 anti-MyD88, anti-TLR2, anti-ASC and anti-LAMP-1 (Molecular Probes Alexa Fluor 568,  
788 A11036) (1:200). Incubations with primary and secondary antibodies were done for 1 hour  
789 each at room temperature; slide wells were washed following each incubation three times  
790 with PBS supplemented with 0.5% Tween-20, with a final wash in distilled H<sub>2</sub>O before  
791 mounting. After antibody staining, slides were mounted using Vectashield (Vector H-  
792 1000) and imaged using a Zeiss 880 confocal microscope. Image processing and  
793 analysis were performed using ImageJ (NIH, v1.41b). Colocalization values were  
794 determined by first analyzing profile plots in ImageJ (Plug-in: "Plot Profile") across ten  
795 different phagosomes for each cell genotype and then calculating the average difference  
796 between the fluorescence intensity curves of the markers of interest (i.e., LAMP-1 and  
797 Bb). Binding percentages were calculated by imaging 100-200 cells using a confocal  
798 microscope and then measuring the ratio of cells containing at least one surface-bound  
799 or internalized spirochete to the total number of cells imaged for each condition,  
800 represented as %BMDMs interacting w/Bb. Uptake percentages were calculated by  
801 imaging 100-200 cells using a confocal microscope and then measuring the ratio of cells  
802 containing at least one internalized spirochete to the total number of cells imaged for each  
803 condition, represented as %BMDMs w/internalized Bb.

804

#### 805 **Western Blotting of BMDM Supernatants and Lysates:**

806 Protein lysates were generated from BMDM cell culture lysates and supernatants after  
807 Bb stimulation. In these experiments, adenosine triphosphate (ATP) (Sigma, 3A6419-1G)  
808 was added to WT BMDMs (already stimulated with Bb for 5 hours) 1 hour prior to harvest  
809 for generation of lysates. Supernatants were treated with an equal volume of methanol  
810 and ¼ volume of chloroform, vortexed and spun at 16000 x g for 10 minutes. After removal  
811 of the upper phase, 500 µL of methanol was added to the intermediate phase, which was  
812 then vortexed and spun at 16000 x g for 10 minutes. The pellets were then dried at room  
813 temperature, resuspended in 30 µL of 2x Laemmli buffer and incubated in a 37°C water  
814 bath until proteins became soluble. BMDMs were lysed using RIPA buffer at -80°C and  
815 spun at maximum speed for 10 minutes. Protein pellets were resuspended in 2x Laemmli

816 buffer. Lysates were boiled at 99°C for 10 minutes and run on a 12.5% SDS-PAGE gel at  
817 140V for 1 hour (5 $\mu$ L per lane, 15 lanes). Proteins were then transferred to nitrocellulose  
818 membranes (Bio-Rad 162-0177) at 20V for 20 minutes. Membranes were blocked for 1  
819 hour in milk block solution and then incubated overnight at 4°C with primary antibodies  
820 for either  $\beta$ -actin (Sigma A5441, 1:2000), IL-1 $\beta$  (R&D AF401NA, 1:800) or caspase-1  
821 (Adipogen AG-20B-0042, 1:1000) diluted in milk block solution. Membranes were then  
822 washed 5 times for 5 minutes each in wash buffer (PBS supplemented with 0.5% Tween-  
823 20) and incubated with goat anti-mouse HRP-conjugated IgG (GE NA931) diluted 1:5000  
824 ( $\beta$ -actin and Caspase-1) or 1:1000 (IL-1 $\beta$ ) in milk block for 2 hours at room temperature.  
825 Following additional washes, membranes were incubated in HyGlo spray chemiluminescent  
826 substrates (Denville Scientific, E2400) for 5 minutes and imaged on a Biorad ChemiDoc  
827 MP imaging system.

828

#### 829 **Cytokine Analysis:**

830 The Cytokine Bead Array Mouse Inflammation kit (BD Biosciences 552364) was used  
831 according to manufacturer's instructions for simultaneous measurement of IL-6, IL-10,  
832 CCL2, IFN $\gamma$ , TNF $\alpha$ , and IL-12p70 in supernatants from stimulated BMDMs. General  
833 statistical analysis was performed using GraphPad Prism 4.0 (GraphPad Software, San  
834 Diego, CA), using an unpaired Student *t* test. For each experiment, both the standard  
835 deviation and the standard error of the mean were calculated. P-values of <0.05 were  
836 considered significant.

837

#### 838 **Identification of Differentially Expressed Genes by RNA-Seq:**

839 Total RNA was extracted from three biological replicates of WT and MyD88 $^{-/-}$  BMDMs,  
840 either unstimulated or stimulated with Bb at MOI 10:1 or MOI 100:1 for 6 hours. Following  
841 stimulation, RNA was isolated using the total RNA isolation kit (Macherey-Nagel) and was  
842 used as input for the Ovation RNA-seq V1 kit (NuGen, San Carlos, CA). cDNA output  
843 was analyzed for correct size distribution with an Experion Standard Sensitivity RNA chip  
844 and quantified using a Qubit Fluorometer (Invitrogen, Carlsbad, CA). Sequencing libraries  
845 were produced using the NuGen Encore NGS Library I kit. Libraries were multiplexed and  
846 sequenced at The Jackson Laboratory for Genomic Medicine Sequencing Core with an



847 Illumina HiSeq 2500 as 2X50bp pair end reads. RNA-Seq reads from each individual  
848 library were mapped with Tophat2 RNA-Seq spliced reads mapper (version 2.0.5) (85) to  
849 mouse genome build mm9 with parameter settings adjusted to suit strand-specific pair-  
850 end RNA-Seq reads. The mapping result bam files were used as input to the HTSeq high-  
851 throughput sequencing data analysis package (86) to quantify the read counts mapped  
852 to all genes in UCSC mm9 mouse gene annotation set. The expression levels of genes  
853 represented as mapped read counts were normalized using the DESeq2 RNA-Seq  
854 analysis package (function: *estimateSizeFactor*) (87). Genes were considered expressed  
855 if the number of reads was above the 25<sup>th</sup> percentile for the normalized data set. For  
856 quality control, only replicates with Pearson correlation coefficient above 0.9 on their  
857 FPKM values were considered (**Figure S5**). Expressed genes were then further analyzed  
858 for differential gene expression using the DESeq2 package with FDR cutoff: 0.1.  
859 Differential gene expression was calculated in WT BMDMs stimulated 10:1 with Bb  
860 relative to unstimulated WT BMDMs and MyD88<sup>-/-</sup> BMDMs stimulated 100:1 with Bb  
861 relative to unstimulated MyD88<sup>-/-</sup> BMDMs. Differentially expressed genes (DEGs) were  
862 classified as either upregulated or down regulated based on the log<sub>2</sub> of the fold change  
863 compared to the unstimulated control, which was calculated in R statistical software using  
864 package “DESeq2”. Determined DEGs were then separated into five groups based on  
865 their expression profiles; WT (all DEGs in WT BMDMs), MyD88<sup>-/-</sup> (all DEGs in MyD88<sup>-/-</sup>  
866 BMDMs), MyD88-dependent (all DEGs in WT but not MyD88<sup>-/-</sup> BMDMs), MyD88-  
867 independent (all DEGs in both WT and MyD88<sup>-/-</sup> BMDMs), and MyD88-exclusive (all  
868 DEGs in MyD88<sup>-/-</sup> but not in WT BMDMs).

869

## 870 **Identification of Enriched Transcription Binding Sites and Master Regulator** 871 **Analysis:**

872 Transcription factor binding sites in promoters of differentially-expressed genes were  
873 analyzed using known DNA-binding motifs described in the TRANSFAC library (88),  
874 release 2017.2, available in the GeneXplain software (<http://genexplain.com>). Binding site  
875 enrichment analysis for each one of our sets of DEGs was carried out as part of a  
876 GeneXplain dedicated workflow. The background consisted of 300 mouse house-keeping  
877 genes and the TRANSFAC mouse Positional Weight Matrices PWM (motifs) for binding



878 site prediction with  $p$ -value $<0.001$  score cutoff. Promoters were extracted by the workflow  
879 with a length of 600 bp ( $-500$  to  $+100$ ) and an enrichment fold of 1.0.

880

881 Master regulatory molecules were searched for in signal transduction pathways upstream  
882 of the identified transcription factors. The GeneXplain workflow available for this analysis  
883 was used in conjunction with the GeneWays database. Parameters set included a  
884 maximum radius of 10 steps upstream of the transcription factor nodes, the DEG lists  
885 from the respective group as context genes and a z-score cutoff of 1.0. All transcription  
886 factors and master regulators used in the network analysis had confirmed expression in  
887 respective conditions using the total gene expression lists from the RNA-sequencing data  
888 set.

889

#### 890 **Gene Ontology (GO) Enrichment Analysis:**

891 A Gene Ontology (GO) enrichment analysis was performed for the different sets of DEGs,  
892 transcription factors, and master regulators using the TRANSPATH (89) database  
893 through GeneXplain software. Input sets were the DEGs, transcription factors, or master  
894 regulators from either the MyD88-dependent, MyD88-independent, or MyD88-privative  
895 groups. Focus was directed to the Gene Ontology (GO) biological processes output. GO  
896 biological processes related to Bb uptake, inflammation, and chemotaxis were identified  
897 by first reviewing previous studies for any genes involved in response to Bb relating to  
898 these phenotypes. Enrichment analysis was performed on these genes to identify GO  
899 biological processes that hit at least 60% of the genes on the list, generating a list of  
900 relevant GO biological processes. Then an intersection was performed between the list  
901 of GO biological processes identified using our DEG, transcription factor, or master  
902 regulator lists, and the GO biological processes identified from the relevant genes. Heat  
903 maps of expressed genes hits in each biological process were done in R statistical  
904 software using package “ggplots”.

905

#### 906 **Network Reconstruction and Network Analysis:**

907 Networks were constructed joining the three identified layers on the networks: DEGs,  
908 transcription factors, and master regulators. The subnetworks were extracted from

909 identified master regulators of interest. From the MyD88-dependent master regulator  
910 group, effort was directed on linking MyD88 with transcription factors that had binding  
911 sites in the promoter regions of the MyD88-dependent DEGs enriched in uptake biological  
912 processes. These transcription factors were identified using the TRANSPATH database  
913 with the enriched DEGs of interest as input. The output list of transcription factors was  
914 intersected with the list of transcription factors that were only expressed in WT BMDMs.  
915 Networks were assembled and analyzed using Cytoscape software (90). To extract the  
916 desired subnetworks, we used OCSANA (91) within the BiNOM plugin (92) in Cytoscape  
917 2.8.3. MyD88 was considered as a source node and transcription factors from the  
918 intersected list as target nodes. For MyD88-privative chemotaxis subnetwork construction  
919 the same analysis pipeline was applied. MyD88-privative master regulators significantly  
920 enriched in chemotaxis were used as source nodes and MyD88-privative transcription  
921 factors enriched in chemotaxis were used as targets.

922

923

924 **ACKNOWLEDGEMENTS**

925 The authors would like to thank Anna Allard, Morgan Ledoyt and Dr. Ashley Groshong for  
926 their contribution and support to execution of the experiments. The authors would also  
927 like to thank Dr. Reinhard Laubenbacher for resources provided when developing  
928 computational data. This work was funded by both the National Institutes of Health and  
929 Connecticut Children's Medical Center.

930

931 **AUTHOR CONTRIBUTIONS**

932 Sarah Benjamin (Figures 1-7): Conceptualization, Formal Analysis, Investigation,  
933 Methodology, Validation, Visualization, Original Draft Preparation, Review and Editing

934 Kelly Hawley (Figures 1-3, 7): Methodology, Project Administration, Supervision, Review  
935 and Editing

936 Paola-Vera Licon (Figures 4-6): Conceptualization, Formal Analysis, Project  
937 Administration, Supervision, Validation, Review and Editing

938 Carson J. LaVake (Figures 1-7): Investigation, Methodology, Review and Editing

939 Jorge L. Cervantes (Figures 4-6): Investigation

940 Rachel Burns: (Figure 1): Formal Analysis, Review and Editing

941 Oscar Luo: (Figures 4-6): Formal Analysis, Software

942 Yijun Ruan: (Figures 4-6): Resources

943 Melissa J. Caimano (Figures 1-3, 7): Methodology, Project Administration, Validation,  
944 Review and Editing

945 Justin D. Radolf (Figures 1-7): Conceptualization, Project Administration, Review and  
946 Editing

947 Juan C. Salazar (Figures 1-7): Conceptualization, Funding Acquisition, Project  
948 Administration, Resources, Supervision, Original Draft Preparation, Review and Editing

949

950 **DECLARATION OF INTERESTS**

951 The authors have no interests to declare.

952

953

954

955

956

957

958 **REFERENCES**

959

960 1. Benach JL, Bosler EM, Hanrahan JP, Coleman JL, Habicht GS, Bast TF, et al.  
961 Spirochetes isolated from the blood of two patients with Lyme disease. *N Engl J Med.*  
962 1983;308(13):740-2.

963 2. CDC. Lyme Disease Incidence Rates by State 2004-2015 2016 [Available from:  
964 <http://www.cdc.gov/lyme/stats/chartstables/incidencebystate.html>].

965 3. Steere AC. Lyme disease. *N Engl J Med.* 1989;321(9):586-96.

966 4. CDC. Signs and Symptoms of Untreated Lyme Disease 2016 [Available from:  
967 [http://www.cdc.gov/lyme/signs\\_symptoms/index.html](http://www.cdc.gov/lyme/signs_symptoms/index.html)].

968 5. Steere AC, Strle F, Wormser GP, Hu LT, Branda JA, Hovius JW, et al. Lyme  
969 borreliosis. *Nat Rev Dis Primers.* 2016;2:16090.

970 6. Bockenstedt JJWaLK. Host Response. In: Radolf DSSaJD, editor. *Borrelia:*  
971 *Molecular Biology, Host Interaction and Pathogenesis.* Norfolk UK: Caister Academic  
972 Press; 2010. p. 413-41.

973 7. Salazar JC, Pope CD, Sellati TJ, Feder HM, Jr., Kiely TG, Dardick KR, et al.  
974 Coevolution of markers of innate and adaptive immunity in skin and peripheral blood of  
975 patients with erythema migrans. *J Immunol.* 2003;171(5):2660-70.

976 8. Shin JJ, Strle K, Glickstein LJ, Luster AD, Steere AC. *Borrelia burgdorferi*  
977 stimulation of chemokine secretion by cells of monocyte lineage in patients with Lyme  
978 arthritis. *Arthritis research & therapy.* 2010;12(5):R168.

979 9. Lasky CE, Olson RM, Brown CR. Macrophage Polarization during Murine Lyme  
980 Borreliosis. *Infect Immun.* 2015;83(7):2627-35.

981 10. Montgomery RR, Booth CJ, Wang X, Blaho VA, Malawista SE, Brown CR.  
982 Recruitment of macrophages and polymorphonuclear leukocytes in Lyme carditis. *Infect*  
983 *Immun.* 2007;75(2):613-20.

984 11. Hawley KL, Olson CM, Jr., Iglesias-Pedraz JM, Navasa N, Cervantes JL, Caimano  
985 MJ, et al. CD14 cooperates with complement receptor 3 to mediate MyD88-independent  
986 phagocytosis of *Borrelia burgdorferi*. *Proceedings of the National Academy of Sciences*  
987 *of the United States of America.* 2012;109(4):1228-32.

- 988 12. Cinco M, Murgia R, Presani G, Perticarari S. Integrin CR3 mediates the binding of  
989 nonspecifically opsonized *Borrelia burgdorferi* to human phagocytes and mammalian  
990 cells. *Infect Immun.* 1997;65(11):4784-9.
- 991 13. Behera AK, Hildebrand E, Uematsu S, Akira S, Coburn J, Hu LT. Identification of  
992 a TLR-independent pathway for *Borrelia burgdorferi*-induced expression of matrix  
993 metalloproteinases and inflammatory mediators through binding to integrin alpha 3 beta  
994 1. *J Immunol.* 2006;177(1):657-64.
- 995 14. Cervantes JL, Hawley KL, Benjamin SJ, Weinerman B, Luu SM, Salazar JC.  
996 Phagosomal TLR signaling upon *Borrelia burgdorferi* infection. *Front Cell Infect Microbiol.*  
997 2014;4:55.
- 998 15. Naj X, Hoffmann AK, Himmel M, Linder S. The formins FMNL1 and mDia1 regulate  
999 coiling phagocytosis of *Borrelia burgdorferi* by primary human macrophages. *Infect*  
1000 *Immun.* 2013;81(5):1683-95.
- 1001 16. Naj X, Linder S. ER-Coordinated Activities of Rab22a and Rab5a Drive  
1002 Phagosomal Compaction and Intracellular Processing of *Borrelia burgdorferi* by  
1003 Macrophages. *Cell Rep.* 2015;12(11):1816-30.
- 1004 17. Moore MW, Cruz AR, LaVake CJ, Marzo AL, Eggers CH, Salazar JC, et al.  
1005 Phagocytosis of *Borrelia burgdorferi* and *Treponema pallidum* potentiates innate immune  
1006 activation and induces gamma interferon production. *Infect Immun.* 2007;75(4):2046-62.
- 1007 18. Salazar JC, Duhnam-Ems S, La Vake C, Cruz AR, Moore MW, Caimano MJ, et al.  
1008 Activation of human monocytes by live *Borrelia burgdorferi* generates TLR2-dependent  
1009 and -independent responses which include induction of IFN-beta. *PLoS Pathog.*  
1010 2009;5(5):e1000444.
- 1011 19. Cervantes JL, Dunham-Ems SM, La Vake CJ, Petzke MM, Sahay B, Sellati TJ, et  
1012 al. Phagosomal signaling by *Borrelia burgdorferi* in human monocytes involves Toll-like  
1013 receptor (TLR) 2 and TLR8 cooperativity and TLR8-mediated induction of IFN-beta.  
1014 *Proceedings of the National Academy of Sciences of the United States of America.*  
1015 2011;108(9):3683-8.
- 1016 20. Brandt ME, Riley BS, Radolf JD, Norgard MV. Immunogenic integral membrane  
1017 proteins of *Borrelia burgdorferi* are lipoproteins. *Infect Immun.* 1990;58(4):983-91.
- 1018 21. Schenk M, Belisle JT, Modlin RL. TLR2 looks at lipoproteins. *Immunity.*  
1019 2009;31(6):847-9.
- 1020 22. Hirschfeld M, Kirschning CJ, Schwandner R, Wesche H, Weis JH, Wooten RM, et  
1021 al. Cutting edge: inflammatory signaling by *Borrelia burgdorferi* lipoproteins is mediated  
1022 by toll-like receptor 2. *J Immunol.* 1999;163(5):2382-6.

- 1023 23. Wooten RM, Ma Y, Yoder RA, Brown JP, Weis JH, Zachary JF, et al. Toll-like  
1024 receptor 2 is required for innate, but not acquired, host defense to *Borrelia burgdorferi*. *J*  
1025 *Immunol.* 2002;168(1):348-55.
- 1026 24. Radolf JD, Norgard MV, Brandt ME, Isaacs RD, Thompson PA, Beutler B.  
1027 Lipoproteins of *Borrelia burgdorferi* and *Treponema pallidum* activate cachectin/tumor  
1028 necrosis factor synthesis. Analysis using a CAT reporter construct. *J Immunol.*  
1029 1991;147(6):1968-74.
- 1030 25. Alexopoulou L, Thomas V, Schnare M, Lobet Y, Anguita J, Schoen RT, et al.  
1031 Hyporesponsiveness to vaccination with *Borrelia burgdorferi* OspA in humans and in  
1032 TLR1- and TLR2-deficient mice. *Nature medicine.* 2002;8(8):878-84.
- 1033 26. Radolf JD, Arndt LL, Akins DR, Curetty LL, Levi ME, Shen Y, et al. *Treponema*  
1034 *pallidum* and *Borrelia burgdorferi* lipoproteins and synthetic lipopeptides activate  
1035 monocytes/macrophages. *J Immunol.* 1995;154(6):2866-77.
- 1036 27. Radolf JD, Goldberg MS, Bourell K, Baker SI, Jones JD, Norgard MV.  
1037 Characterization of outer membranes isolated from *Borrelia burgdorferi*, the Lyme  
1038 disease spirochete. *Infect Immun.* 1995;63(6):2154-63.
- 1039 28. Shin OS, Isberg RR, Akira S, Uematsu S, Behera AK, Hu LT. Distinct roles for  
1040 MyD88 and Toll-like receptors 2, 5, and 9 in phagocytosis of *Borrelia burgdorferi* and  
1041 cytokine induction. *Infect Immun.* 2008;76(6):2341-51.
- 1042 29. Cervantes JL, La Vake CJ, Weinerman B, Luu S, O'Connell C, Verardi PH, et al.  
1043 Human TLR8 is activated upon recognition of *Borrelia burgdorferi* RNA in the phagosome  
1044 of human monocytes. *Journal of leukocyte biology.* 2013;94(6):1231-41.
- 1045 30. Akira S, Takeda K, Kaisho T. Toll-like receptors: critical proteins linking innate and  
1046 acquired immunity. *Nat Immunol.* 2001;2(8):675-80.
- 1047 31. Edelson BT, Unanue ER. MyD88-dependent but Toll-like receptor 2-independent  
1048 innate immunity to *Listeria*: no role for either in macrophage listericidal activity. *J Immunol.*  
1049 2002;169(7):3869-75.
- 1050 32. Blander JM. Coupling Toll-like receptor signaling with phagocytosis: potentiation  
1051 of antigen presentation. *Trends Immunol.* 2007;28(1):19-25.
- 1052 33. Takeuchi O, Hoshino K, Akira S. Cutting edge: TLR2-deficient and MyD88-  
1053 deficient mice are highly susceptible to *Staphylococcus aureus* infection. *J Immunol.*  
1054 2000;165(10):5392-6.
- 1055 34. Ip WK, Sokolovska A, Charriere GM, Boyer L, Dejardin S, Cappillino MP, et al.  
1056 Phagocytosis and phagosome acidification are required for pathogen processing and  
1057 MyD88-dependent responses to *Staphylococcus aureus*. *J Immunol.* 2010;184(12):7071-  
1058 81.



- 1059 35. Shen Y, Kawamura I, Nomura T, Tsuchiya K, Hara H, Dewamitta SR, et al. Toll-  
1060 like receptor 2- and MyD88-dependent phosphatidylinositol 3-kinase and Rac1 activation  
1061 facilitates the phagocytosis of *Listeria monocytogenes* by murine macrophages. *Infect*  
1062 *Immun.* 2010;78(6):2857-67.
- 1063 36. Shin OS, Miller LS, Modlin RL, Akira S, Uematsu S, Hu LT. Downstream signals  
1064 for MyD88-mediated phagocytosis of *Borrelia burgdorferi* can be initiated by TRIF and  
1065 are dependent on PI3K. *J Immunol.* 2009;183(1):491-8.
- 1066 37. Hoffmann AK, Naj X, Linder S. Daam1 is a regulator of filopodia formation and  
1067 phagocytic uptake of *Borrelia burgdorferi* by primary human macrophages. *FASEB J.*  
1068 2014;28(7):3075-89.
- 1069 38. Blander JM, Medzhitov R. Regulation of phagosome maturation by signals from  
1070 toll-like receptors. *Science.* 2004;304(5673):1014-8.
- 1071 39. Hawley K, Navasa N, Olson CM, Jr., Bates TC, Garg R, Hedrick MN, et al.  
1072 Macrophage p38 mitogen-activated protein kinase activity regulates invariant natural  
1073 killer T-cell responses during *Borrelia burgdorferi* infection. *The Journal of infectious*  
1074 *diseases.* 2012;206(2):283-91.
- 1075 40. Bolz DD, Sundsbak RS, Ma Y, Akira S, Kirschning CJ, Zachary JF, et al. MyD88  
1076 plays a unique role in host defense but not arthritis development in Lyme disease. *J*  
1077 *Immunol.* 2004;173(3):2003-10.
- 1078 41. Behera AK, Hildebrand E, Bronson RT, Perides G, Uematsu S, Akira S, et al.  
1079 MyD88 deficiency results in tissue-specific changes in cytokine induction and  
1080 inflammation in interleukin-18-independent mice infected with *Borrelia burgdorferi*. *Infect*  
1081 *Immun.* 2006;74(3):1462-70.
- 1082 42. Liu N, Montgomery RR, Barthold SW, Bockenstedt LK. Myeloid differentiation  
1083 antigen 88 deficiency impairs pathogen clearance but does not alter inflammation in  
1084 *Borrelia burgdorferi*-infected mice. *Infect Immun.* 2004;72(6):3195-203.
- 1085 43. Olson CM, Jr., Bates TC, Izadi H, Radolf JD, Huber SA, Boyson JE, et al. Local  
1086 production of IFN-gamma by invariant NKT cells modulates acute Lyme carditis. *J*  
1087 *Immunol.* 2009;182(6):3728-34.
- 1088 44. Armstrong AL, Barthold SW, Persing DH, Beck DS. Carditis in Lyme disease  
1089 susceptible and resistant strains of laboratory mice infected with *Borrelia burgdorferi*. *Am*  
1090 *J Trop Med Hyg.* 1992;47(2):249-58.
- 1091 45. Utans U, Arceci RJ, Yamashita Y, Russell ME. Cloning and characterization of  
1092 allograft inflammatory factor-1: a novel macrophage factor identified in rat cardiac  
1093 allografts with chronic rejection. *The Journal of clinical investigation.* 1995;95(6):2954-62.
- 1094 46. Yates RM, Russell DG. Phagosome maturation proceeds independently of  
1095 stimulation of toll-like receptors 2 and 4. *Immunity.* 2005;23(4):409-17.

- 1096 47. Underhill DM, Ozinsky A, Hajjar AM, Stevens A, Wilson CB, Bassetti M, et al. The  
1097 Toll-like receptor 2 is recruited to macrophage phagosomes and discriminates between  
1098 pathogens. *Nature*. 1999;401(6755):811-5.
- 1099 48. Petnicki-Ocwieja T, Kern A, Killpack TL, Bunnell SC, Hu LT. Adaptor Protein-3-  
1100 Mediated Trafficking of TLR2 Ligands Controls Specificity of Inflammatory Responses but  
1101 Not Adaptor Complex Assembly. *J Immunol*. 2015;195(9):4331-40.
- 1102 49. Bergstrom B, Aune MH, Awuh JA, Kojen JF, Blix KJ, Ryan L, et al. TLR8 Senses  
1103 *Staphylococcus aureus* RNA in Human Primary Monocytes and Macrophages and  
1104 Induces IFN-beta Production via a TAK1-IKKbeta-IRF5 Signaling Pathway. *J Immunol*.  
1105 2015;195(3):1100-11.
- 1106 50. Nilsen NJ, Deininger S, Nonstad U, Skjeldal F, Husebye H, Rodionov D, et al.  
1107 Cellular trafficking of lipoteichoic acid and Toll-like receptor 2 in relation to signaling: role  
1108 of CD14 and CD36. *Journal of leukocyte biology*. 2008;84(1):280-91.
- 1109 51. Petzke MM, Brooks A, Krupna MA, Mordue D, Schwartz I. Recognition of *Borrelia*  
1110 *burgdorferi*, the Lyme disease spirochete, by TLR7 and TLR9 induces a type I IFN  
1111 response by human immune cells. *J Immunol*. 2009;183(8):5279-92.
- 1112 52. Heil F, Hemmi H, Hochrein H, Ampenberger F, Kirschning C, Akira S, et al.  
1113 Species-specific recognition of single-stranded RNA via toll-like receptor 7 and 8.  
1114 *Science*. 2004;303(5663):1526-9.
- 1115 53. Adachi O, Kawai T, Takeda K, Matsumoto M, Tsutsui H, Sakagami M, et al.  
1116 Targeted disruption of the MyD88 gene results in loss of IL-1- and IL-18-mediated  
1117 function. *Immunity*. 1998;9(1):143-50.
- 1118 54. Blander JM, Medzhitov R. On regulation of phagosome maturation and antigen  
1119 presentation. *Nat Immunol*. 2006;7(10):1029-35.
- 1120 55. Westphal A, Cheng W, Yu J, Grassl G, Krautkramer M, Holst O, et al. Lysosomal  
1121 trafficking regulator Lyst links membrane trafficking to toll-like receptor-mediated  
1122 inflammatory responses. *J Exp Med*. 2017;214(1):227-44.
- 1123 56. Oosting M, van de Veerdonk FL, Kanneganti TD, Sturm P, Verschueren I, Berende  
1124 A, et al. *Borrelia* species induce inflammasome activation and IL-17 production through a  
1125 caspase-1-dependent mechanism. *Eur J Immunol*. 2011;41(1):172-81.
- 1126 57. Oosting M, Berende A, Sturm P, Ter Hofstede HJ, de Jong DJ, Kanneganti TD, et  
1127 al. Recognition of *Borrelia burgdorferi* by NOD2 is central for the induction of an  
1128 inflammatory reaction. *The Journal of infectious diseases*. 2010;201(12):1849-58.
- 1129 58. Sokolovska A, Becker CE, Ip WK, Rathinam VA, Brudner M, Paquette N, et al.  
1130 Activation of caspase-1 by the NLRP3 inflammasome regulates the NADPH oxidase  
1131 NOX2 to control phagosome function. *Nat Immunol*. 2013;14(6):543-53.



- 1132 59. Keller AD, Maniatis T. Identification and characterization of a novel repressor of  
1133 beta-interferon gene expression. *Genes Dev.* 1991;5(5):868-79.
- 1134 60. Yao Z, Spriggs MK, Derry JM, Strockbine L, Park LS, VandenBos T, et al.  
1135 Molecular characterization of the human interleukin (IL)-17 receptor. *Cytokine.*  
1136 1997;9(11):794-800.
- 1137 61. Naj X, Linder S. Actin-Dependent Regulation of *Borrelia burgdorferi* Phagocytosis  
1138 by Macrophages. *Curr Top Microbiol Immunol.* 2017;399:133-54.
- 1139 62. Toledo A, Monzon JD, Coleman JL, Garcia-Monco JC, Benach JL.  
1140 Hypercholesterolemia and ApoE deficiency result in severe infection with Lyme disease  
1141 and relapsing-fever *Borrelia*. *Proceedings of the National Academy of Sciences of the*  
1142 *United States of America.* 2015;112(17):5491-6.
- 1143 63. Mantovani A, Sica A, Sozzani S, Allavena P, Vecchi A, Locati M. The chemokine  
1144 system in diverse forms of macrophage activation and polarization. *Trends Immunol.*  
1145 2004;25(12):677-86.
- 1146 64. Ahuja SK, Murphy PM. The CXC chemokines growth-regulated oncogene (GRO)  
1147 alpha, GRObeta, GROgamma, neutrophil-activating peptide-2, and epithelial cell-derived  
1148 neutrophil-activating peptide-78 are potent agonists for the type B, but not the type A,  
1149 human interleukin-8 receptor. *J Biol Chem.* 1996;271(34):20545-50.
- 1150 65. Barthold SW, Beck DS, Hansen GM, Terwilliger GA, Moody KD. Lyme borreliosis  
1151 in selected strains and ages of laboratory mice. *The Journal of infectious diseases.*  
1152 1990;162(1):133-8.
- 1153 66. Radolf JD, Caimano MJ, Stevenson B, Hu LT. Of ticks, mice and men:  
1154 understanding the dual-host lifestyle of Lyme disease spirochaetes. *Nat Rev Microbiol.*  
1155 2012;10(2):87-99.
- 1156 67. Guerau-de-Arellano M, Alroy J, Bullard D, Huber BT. Aggravated Lyme carditis in  
1157 CD11a<sup>-/-</sup> and CD11c<sup>-/-</sup> mice. *Infect Immun.* 2005;73(11):7637-43.
- 1158 68. Guerau-de-Arellano M, Alroy J, Huber BT. Beta2 integrins control the severity of  
1159 murine Lyme carditis. *Infect Immun.* 2005;73(6):3242-50.
- 1160 69. Ritzman AM, Hughes-Hanks JM, Blaho VA, Wax LE, Mitchell WJ, Brown CR. The  
1161 chemokine receptor CXCR2 ligand KC (CXCL1) mediates neutrophil recruitment and is  
1162 critical for development of experimental Lyme arthritis and carditis. *Infect Immun.*  
1163 2010;78(11):4593-600.
- 1164 70. Benach JL, Habicht GS, Gocinski BL, Coleman JL. Phagocytic cell responses to  
1165 in vivo and in vitro exposure to the Lyme disease spirochete. *Yale J Biol Med.*  
1166 1984;57(4):599-605.

- 1167 71. Murphy GA, Solski PA, Jillian SA, Perez de la Ossa P, D'Eustachio P, Der CJ, et  
1168 al. Cellular functions of TC10, a Rho family GTPase: regulation of morphology, signal  
1169 transduction and cell growth. *Oncogene*. 1999;18(26):3831-45.
- 1170 72. Levin R, Grinstein S, Canton J. The life cycle of phagosomes: formation,  
1171 maturation, and resolution. *Immunol Rev*. 2016;273(1):156-79.
- 1172 73. Takenawa T, Suetsugu S. The WASP-WAVE protein network: connecting the  
1173 membrane to the cytoskeleton. *Nat Rev Mol Cell Biol*. 2007;8(1):37-48.
- 1174 74. Petnicki-Ocwieja T, Chung E, Acosta DI, Ramos LT, Shin OS, Ghosh S, et al. TRIF  
1175 mediates Toll-like receptor 2-dependent inflammatory responses to *Borrelia burgdorferi*.  
1176 *Infect Immun*. 2013;81(2):402-10.
- 1177 75. Zhang Y, Olson RM, Brown CR. Macrophage LTB4 drives efficient phagocytosis  
1178 of *Borrelia burgdorferi* via BLT1 or BLT2. *J Lipid Res*. 2017;58(3):494-503.
- 1179 76. Killpack TL, Ballesteros M, Bunnell SC, Bedugnis A, Kobzik L, Hu LT, et al.  
1180 Phagocytic Receptors Activate Syk and Src Signaling during *Borrelia burgdorferi*  
1181 Phagocytosis. *Infect Immun*. 2017;85(10).
- 1182 77. Hawley KL, Martin-Ruiz I, Iglesias-Pedraz JM, Berwin B, Anguita J. CD14 targets  
1183 complement receptor 3 to lipid rafts during phagocytosis of *Borrelia burgdorferi*. *Int J Biol*  
1184 *Sci*. 2013;9(8):803-10.
- 1185 78. Steere AC, Grodzicki RL, Craft JE, Shrestha M, Kornblatt AN, Malawista SE.  
1186 Recovery of Lyme disease spirochetes from patients. *Yale J Biol Med*. 1984;57(4):557-  
1187 60.
- 1188 79. Dunham-Ems SM, Caimano MJ, Pal U, Wolgemuth CW, Eggers CH, Balic A, et al.  
1189 Live imaging reveals a biphasic mode of dissemination of *Borrelia burgdorferi* within ticks.  
1190 *The Journal of clinical investigation*. 2009;119(12):3652-65.
- 1191 80. Sokolovska A, Becker CE, Stuart LM. Measurement of phagocytosis, phagosome  
1192 acidification, and intracellular killing of *Staphylococcus aureus*. *Curr Protoc Immunol*.  
1193 2012;Chapter 14:Unit14 30.
- 1194 81. Dunham-Ems SM, Caimano MJ, Eggers CH, Radolf JD. *Borrelia burgdorferi*  
1195 requires the alternative sigma factor RpoS for dissemination within the vector during tick-  
1196 to-mammal transmission. *PLoS Pathog*. 2012;8(2):e1002532.
- 1197 82. Anguita J, Samanta S, Revilla B, Suk K, Das S, Barthold SW, et al. *Borrelia*  
1198 *burgdorferi* gene expression in vivo and spirochete pathogenicity. *Infect Immun*.  
1199 2000;68(3):1222-30.
- 1200 83. Pal U, Li X, Wang T, Montgomery RR, Ramamoorthi N, Desilva AM, et al.  
1201 TROSPA, an *Ixodes scapularis* receptor for *Borrelia burgdorferi*. *Cell*. 2004;119(4):457-  
1202 68.

- 1203 84. Schmittgen TD, Livak KJ. Analyzing real-time PCR data by the comparative C(T)  
1204 method. *Nature protocols*. 2008;3(6):1101-8.
- 1205 85. Kim D, Pertea G, Trapnell C, Pimentel H, Kelley R, Salzberg SL. TopHat2:  
1206 accurate alignment of transcriptomes in the presence of insertions, deletions and gene  
1207 fusions. *Genome Biol*. 2013;14(4):R36.
- 1208 86. Lister R, Gregory BD, Ecker JR. Next is now: new technologies for sequencing of  
1209 genomes, transcriptomes, and beyond. *Curr Opin Plant Biol*. 2009;12(2):107-18.
- 1210 87. Anders S, Huber W. Differential expression analysis for sequence count data.  
1211 *Genome Biol*. 2010;11(10):R106.
- 1212 88. Matys V, Kel-Margoulis OV, Fricke E, Liebich I, Land S, Barre-Dirrie A, et al.  
1213 TRANSFAC and its module TRANSCompel: transcriptional gene regulation in  
1214 eukaryotes. *Nucleic Acids Res*. 2006;34(Database issue):D108-10.
- 1215 89. Krull M, Pistor S, Voss N, Kel A, Reuter I, Kronenberg D, et al. TRANSPATH: an  
1216 information resource for storing and visualizing signaling pathways and their pathological  
1217 aberrations. *Nucleic Acids Res*. 2006;34(Database issue):D546-51.
- 1218 90. Shannon P, Markiel A, Ozier O, Baliga NS, Wang JT, Ramage D, et al. Cytoscape:  
1219 a software environment for integrated models of biomolecular interaction networks.  
1220 *Genome Res*. 2003;13(11):2498-504.
- 1221 91. Vera-Licona P, Bonnet E, Barillot E, Zinovyev A. OCSANA: optimal combinations  
1222 of interventions from network analysis. *Bioinformatics*. 2013;29(12):1571-3.
- 1223 92. Zinovyev A, Viara E, Calzone L, Barillot E. BiNoM: a Cytoscape plugin for  
1224 manipulating and analyzing biological networks. *Bioinformatics*. 2008;24(6):876-7.  
1225  
1226

1227 **FIGURE CAPTIONS**

1228

1229 **Figure 1: MyD88<sup>-/-</sup> mice show increased inflammation severity and macrophage**  
1230 **infiltrate 28 days post Bb-infection.** (A and C) Representative images of H&E staining  
1231 of heart tissue sections from WT and MyD88<sup>-/-</sup> mice syringe-inoculated with 10<sup>5</sup> Bb at 14  
1232 DPI (A) and 28 DPI (C). Images are of increasing magnification from left to right (10x,  
1233 20x, 40x, inset is 60x). Sections are 5µm. (B and D) Compilation of inflammation scores  
1234 for WT (black dots) and MyD88<sup>-/-</sup> (red dots) mice at 14 DPI (B) and 28 DPI (D) N=5 mice  
1235 per group. (E) Iba-1 immunohistochemistry of heart tissue sections from Bb-infected WT  
1236 and MyD88<sup>-/-</sup> mice, magnification = 20x. Sections are 5µm. (F and G) Compilation of  
1237 qRT-PCR *Tnfa* gene amplifications from heart tissue RNA. Total RNA was isolated from  
1238 Bb-infected WT and MyD88<sup>-/-</sup> mice 14 (F) and 28 (G) days post infection. Gene  
1239 amplification values were normalized to *Gapdh*. \*p-value<0.05, \*\*p-value<0.01, NS=not  
1240 significant

1241

1242 **Figure 2: Quantitation of Bb binding and uptake by WT and MyD88<sup>-/-</sup> BMDMs.** (A)  
1243 Confocal images of WT and MyD88<sup>-/-</sup> BMDMs after 6 hours of stimulation with Bb at MOI  
1244 10:1, highlighting bound (yellow arrows) and internalized (white arrows) spirochetes.  
1245 Green is Bb, red is actin and blue is cell nucleus. (B-C) Quantitation of bound spirochetes  
1246 to WT (black bars) or MyD88<sup>-/-</sup> (red bars) BMDMs after 1, 4 or 6 hours of stimulation at  
1247 a MOI of 10:1 (B) or 100:1 (C). (D-E) Quantitation of internalized spirochetes to WT (black  
1248 bars) or MyD88<sup>-/-</sup> (red bars) BMDMs after 1, 4 or 6 hours of stimulation at MOI 10:1 (D)  
1249 or 100:1 (E). n=3-5 mouse BMDM experiments per genotype \*p-value<0.05, \*\*p-  
1250 value<0.01, \*\*\*p-value<0.001, NS=not significant

1251

1252 **Figure 3: MyD88, TLR2 and TLR7 colocalize with Bb in phagosomes.** (A-C) Confocal  
1253 images and colocalization analysis of internalized Bb with MyD88 (A), TLR2 (B) or TLR7  
1254 (C) in WT BMDMs after stimulation at MOI 10:1. White box indicates phagosome depicted  
1255 in inset. Large inset in (B) shows coiling pseudopod formation around Bb on cell surface.  
1256 Graph shows the intensity of each indicated pixel marker across the white line (distance  
1257 on x-axis). Green is Bb, blue is MyD88 (A), TLR2 (B) or TLR7 (7), and red is actin.

1258

1259 **Figure 4: Colocalization of phagosome markers with internalized Bb in WT and**  
1260 **MyD88<sup>-/-</sup> BMDMs.** (A-B) Confocal images of WT (A) and MyD88<sup>-/-</sup> (B) BMDMs after 6  
1261 hours of stimulation with Bb at MOI 10:1, depicting colocalization of Bb-containing  
1262 phagosomes with LAMP-1. White box indicates phagosome depicted in inset. Graph  
1263 shows the intensity of each indicated pixel across the white line (distance on x-axis).  
1264 Green is Bb, red is LAMP-1 and yellow is actin. (C) Quantitation of colocalization between  
1265 Bb and LAMP-1 in 10 phagosomes of WT (black dots) and MyD88<sup>-/-</sup> (red dots) BMDMs  
1266 by measuring intensity difference between LAMP-1 staining and Bb staining. (D) TNF $\alpha$   
1267 production in WT (black bars) or MyD88<sup>-/-</sup> (red bars) BMDMs after 1, 4 or 6 hours of  
1268 stimulation at MOI 10:1. (E) Western blot of protein lysate isolated from WT BMDMs after  
1269 6-hour stimulation with Bb +/- ATP (C=cell lysate, S=supernatant). \*p-value<0.05, \*\*p-  
1270 value<0.01, \*\*\*p-value<0.001, NS=not significant

1271

1272 **Figure 5: MyD88-dependent DEGs are significantly enriched in biological**  
1273 **processes related to inflammation and uptake.** (A) Comparison of Bb internalization  
1274 by WT BMDMs (black bars) at MOI 10:1 with MyD88<sup>-/-</sup> BMDMs (red bars) at MOI 100:1.  
1275 (B) Number of differentially expressed genes (DEGs) in Bb-infected WT and MyD88<sup>-/-</sup>  
1276 BMDMs determined by RNA-sequencing. Red bar indicates number of upregulated DEGs  
1277 and blue bar indicates number of down-regulated DEGs. Bar height represents total  
1278 number of DEGs in each condition. (C) Venn diagram depicting DEG classification.  
1279 MyD88-dependent genes (light gray, left) are only differentially expressed in WT BMDMs.  
1280 MyD88-independent genes (center) are expressed in both cell types. MyD88-privative  
1281 genes (dark gray, right) are only differentially expressed in MyD88<sup>-/-</sup> BMDMs. (D and E)  
1282 Heat maps depicting fold-change values of MyD88-dependent DEGs enriched in specific  
1283 biological processes. Red indicates positive fold-change increase, blue indicates negative  
1284 fold-change increase, gray indicates no enrichment to biological process. (D) MyD88-  
1285 dependent DEGs that significantly enriched to 5 indicated biological processes relating to  
1286 inflammation. (E) MyD88-dependent DEGs that significantly enriched to 5 indicated  
1287 biological processes relating to uptake.

1288

1289 **Figure 6: MyD88-dependent DEGs that significantly enrich to uptake processes**  
1290 **show direct and indirect connections with key proteins involved in Bb**  
1291 **phagocytosis.** (A) Network of MyD88-dependent uptake DEGs that are upregulated.  
1292 Octagonal nodes with purple borders indicate genes that significantly enriched to uptake  
1293 biological processes. The varying degree of red or blue hue in select nodes correlates  
1294 with the gene's Log2 Fold Change value. Red indicates positive fold change and blue  
1295 indicates negative fold change. Gray nodes represent genes that were not differentially  
1296 expressed. Red boxes indicate genes of interest reviewed in the results. (B) Network of  
1297 MyD88-dependent uptake DEGs that are down-regulated. The same parameters and  
1298 color scale applied in (A) was used.

1299  
1300 **Figure 7: Master regulators of MyD88-dependent and MyD88-privative DEGs**  
1301 **control similar inflammatory processes but different chemotactic processes.** (A and  
1302 B) Heat map showing fold change of master regulators enriched in inflammation (A) or  
1303 chemotaxis (B) in WT (cyan) or MyD88<sup>-/-</sup> (yellow) BMDMs. GO numbers for significantly  
1304 enriched BP are indicated on the x-axis. (C and D) Venn diagrams comparing biological  
1305 processes (BP) relating to inflammation (C) or chemotaxis (D) significantly enriched  
1306 between MyD88-dependent (light gray) and MyD88-privative (dark gray) master  
1307 regulators. (E-F) Protein networks of significant master regulator proteins. Green arrows  
1308 indicate positive regulation from one protein to another. Black arrows indicate unknown  
1309 effect of one protein on another. Proteins in gray boxes represent intermediates and red  
1310 boxes indicate transcription factors. (E) Protein network of MyD88 (blue box) and  
1311 downstream intermediates. (F) Protein network of MyD88-privative master regulators  
1312 (yellow boxes) that significantly enriched to chemotaxis-related BP.

1313  
1314  
1315  
1316  
1317  
1318  
1319



1320 **SUPPLEMENTAL FIGURE CAPTIONS**

1321 **Figure S1: MyD88<sup>-/-</sup> mice show increased Bb burdens 28 and 56 DPI (A-F)** Bb  
1322 burdens in selected mouse tissues as determined by RT-PCR. Mice were syringe-  
1323 inoculated with 10<sup>5</sup> Bb914 and sacrificed 14, 28 or 56 DPI. DNA was isolated from WT  
1324 (black bars) and MyD88<sup>-/-</sup> (red bars) mice. Copies of *flaB* were normalized to *Nidogen*  
1325 amplified from total tissue DNA in heart (A), tibiotarsal joint (B), patellofemoral joint (C),  
1326 skin (D), ear (E), and bladder (F). n=3-5 mice per group \*p-value<0.05, \*\*p-value<0.01,  
1327 NS=not significant, #p-value<0.05 using Mann-Whitney test against WT 14 DPI burden  
1328 values

1329  
1330 **Figure S2: MyD88<sup>-/-</sup> mice show comparable inflammation and macrophage infiltrate**  
1331 **in patellofemoral joint tissue 14- and 28-days post Bb-infection.** (A and C)  
1332 Representative images of H&E staining of patellofemoral tissue sections from WT and  
1333 MyD88<sup>-/-</sup> mice syringe-inoculated with 10<sup>5</sup> Bb at 14 DPI (A) and 28 DPI (C). Images are  
1334 of increasing magnification from left to right (10x, 20x, 40x). Sections are 5µm. (B and D)  
1335 Compilation of inflammation scores for WT (black dots) and MyD88<sup>-/-</sup> (red dots) mice at  
1336 14 DPI (B) and 28 DPI (D) N=5 mice per group. (E) Iba-1 immunohistochemistry of  
1337 patellofemoral joint tissue sections from Bb-infected WT and MyD88<sup>-/-</sup> mice,  
1338 magnification = 20x. Sections are 5µm. (F and G) Compilation of qRT-PCR *Tnfa* gene  
1339 amplifications from patellofemoral joint tissue RNA. Total RNA was isolated from Bb-  
1340 infected WT and MyD88<sup>-/-</sup> mice 14 (F) and 28 (D) days post infection. Gene amplification  
1341 values were normalized to *Gapdh*. \*p-value<0.05, \*\*p-value<0.01, NS=not significant.

1342  
1343 **Figure S3: MyD88<sup>-/-</sup> BMDMs stimulated with Bb show abrogated cytokine**  
1344 **production.** (A-D) Quantification of IL-6 (A), IL-12 (B), IL-10 (C) and CCL2 (D) proteins  
1345 in supernatant from WT and MyD88<sup>-/-</sup> (MyD) BMDMs stimulated with Bb at MOI 10:1 for  
1346 1, 4 or 6 hours. N= 3 mouse BMDM per genotype \*p-value<0.05, \*\*p-value<0.01, \*\*\*p-  
1347 value<0.001, NS=not significant

1348



1349 **Figure S4: Bb does not induce ASC formation in BMDMs.** (A-D) Confocal images  
1350 (40x) of BMDMs stimulated with either Bb (B and D) or Sa (A and C) for 1 hour (A-B) or  
1351 6 hours (C-D). Blue is nucleus, red is ASC and green is the bacteria species.

1352

1353 **Figure S5: Correlation of reads of RNA sequencing data.** (A-D) Correlation of reads  
1354 of RNA isolated from Bb-stimulated BMDMs. WT BMDMs were stimulated at an MOI 10:1  
1355 for 6 hours (A). MyD88<sup>-/-</sup> BMDMs were stimulated at an MOI 100:1 for 6 hours (B). To  
1356 calculate differential expression, reads from the stimulated samples were normalized to  
1357 unstimulated BMDMs of the same genotype; WT (C) or MyD88<sup>-/-</sup> (D).

1358

1359 **Figure S6: MyD88-independent chemokines are produced in MyD88<sup>-/-</sup> mice during**  
1360 ***in vivo* infection.** (A-J) Transcript analysis of Bb-infected WT (black bars) and MyD88<sup>-/-</sup>  
1361 (red bars) heart or patellofemoral joint tissue RNA. Total RNA was isolated 14 and 28  
1362 DPI. Transcript production of *Ccl2* (A-B), *Ccl9* (C-D), *Cxcl2* (E-F), *Cxcl3* (G-H) and *Cxcl10*  
1363 (I-J) were measured by qRT-PCR from total tissue RNA. Gene amplification values were  
1364 normalized to *Gapdh*. \*p-value<0.05, \*\*p-value<0.01, \*\*\*p-value<0.001, NS=not  
1365 significant

1366

1367 **SUPPLEMENTAL FILES**

1368 **Supplemental File 1:** Gene ontology analysis of differentially expressed genes.

1369 **Supplemental File 2:** Gene ontology analysis of identified transcription factors.

1370 **Supplemental File 3:** Gene ontology analysis of identified master regulators.

1371 **Supplemental File 4:** Identified differentially expressed genes.

1372 **Supplemental File 5:** Identified transcription factors.

1373 **Supplemental File 6:** Identified master regulators.

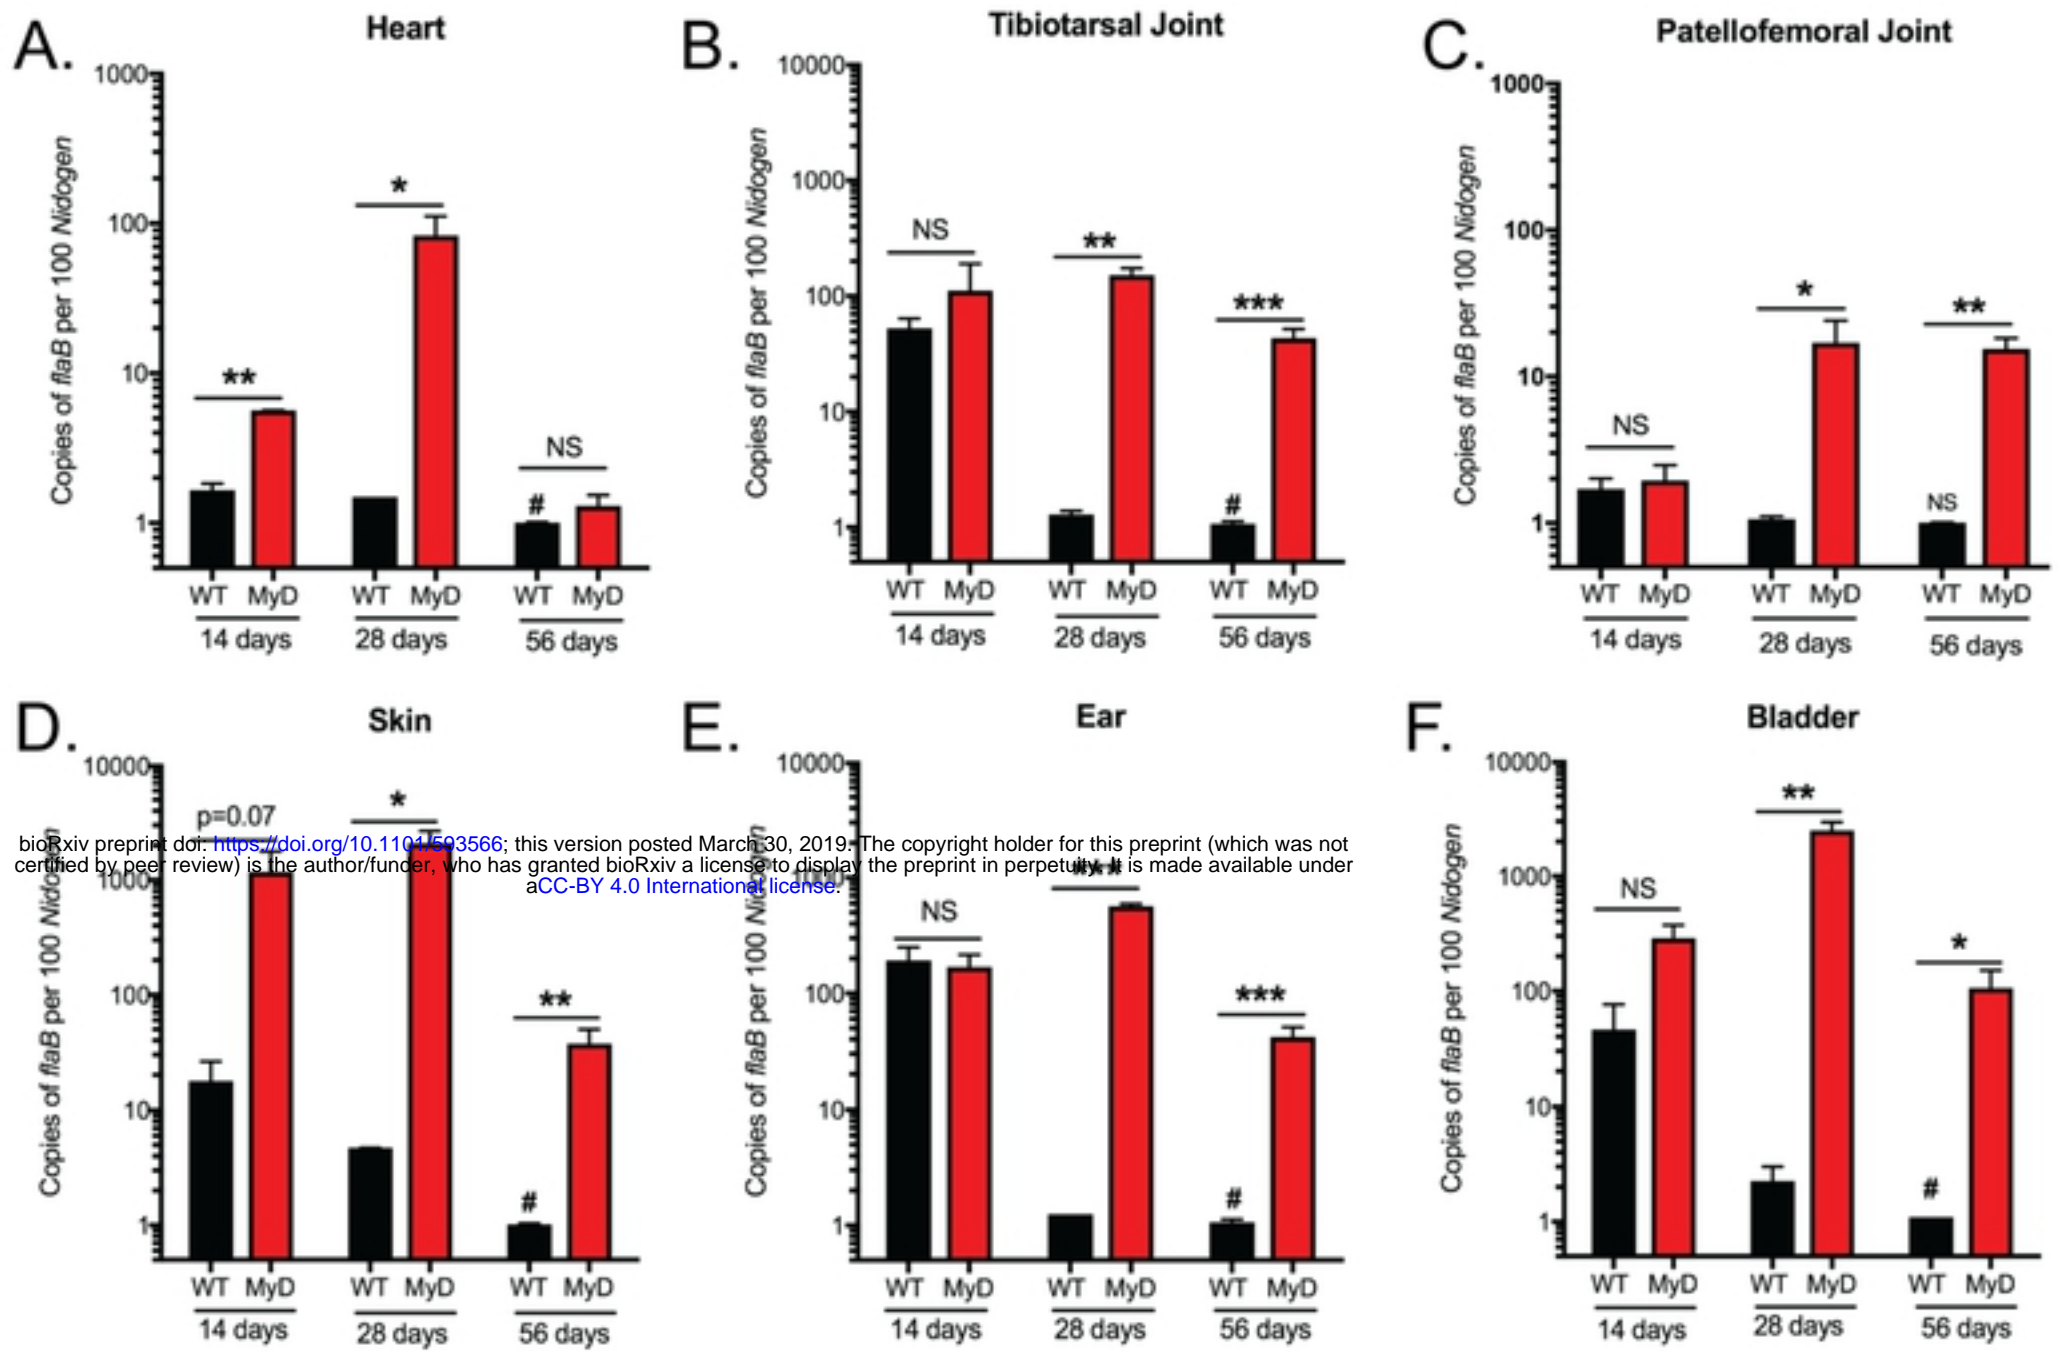

**Figure S1: MyD88<sup>-/-</sup> mice show increased Bb burdens 28 and 56 DPI**



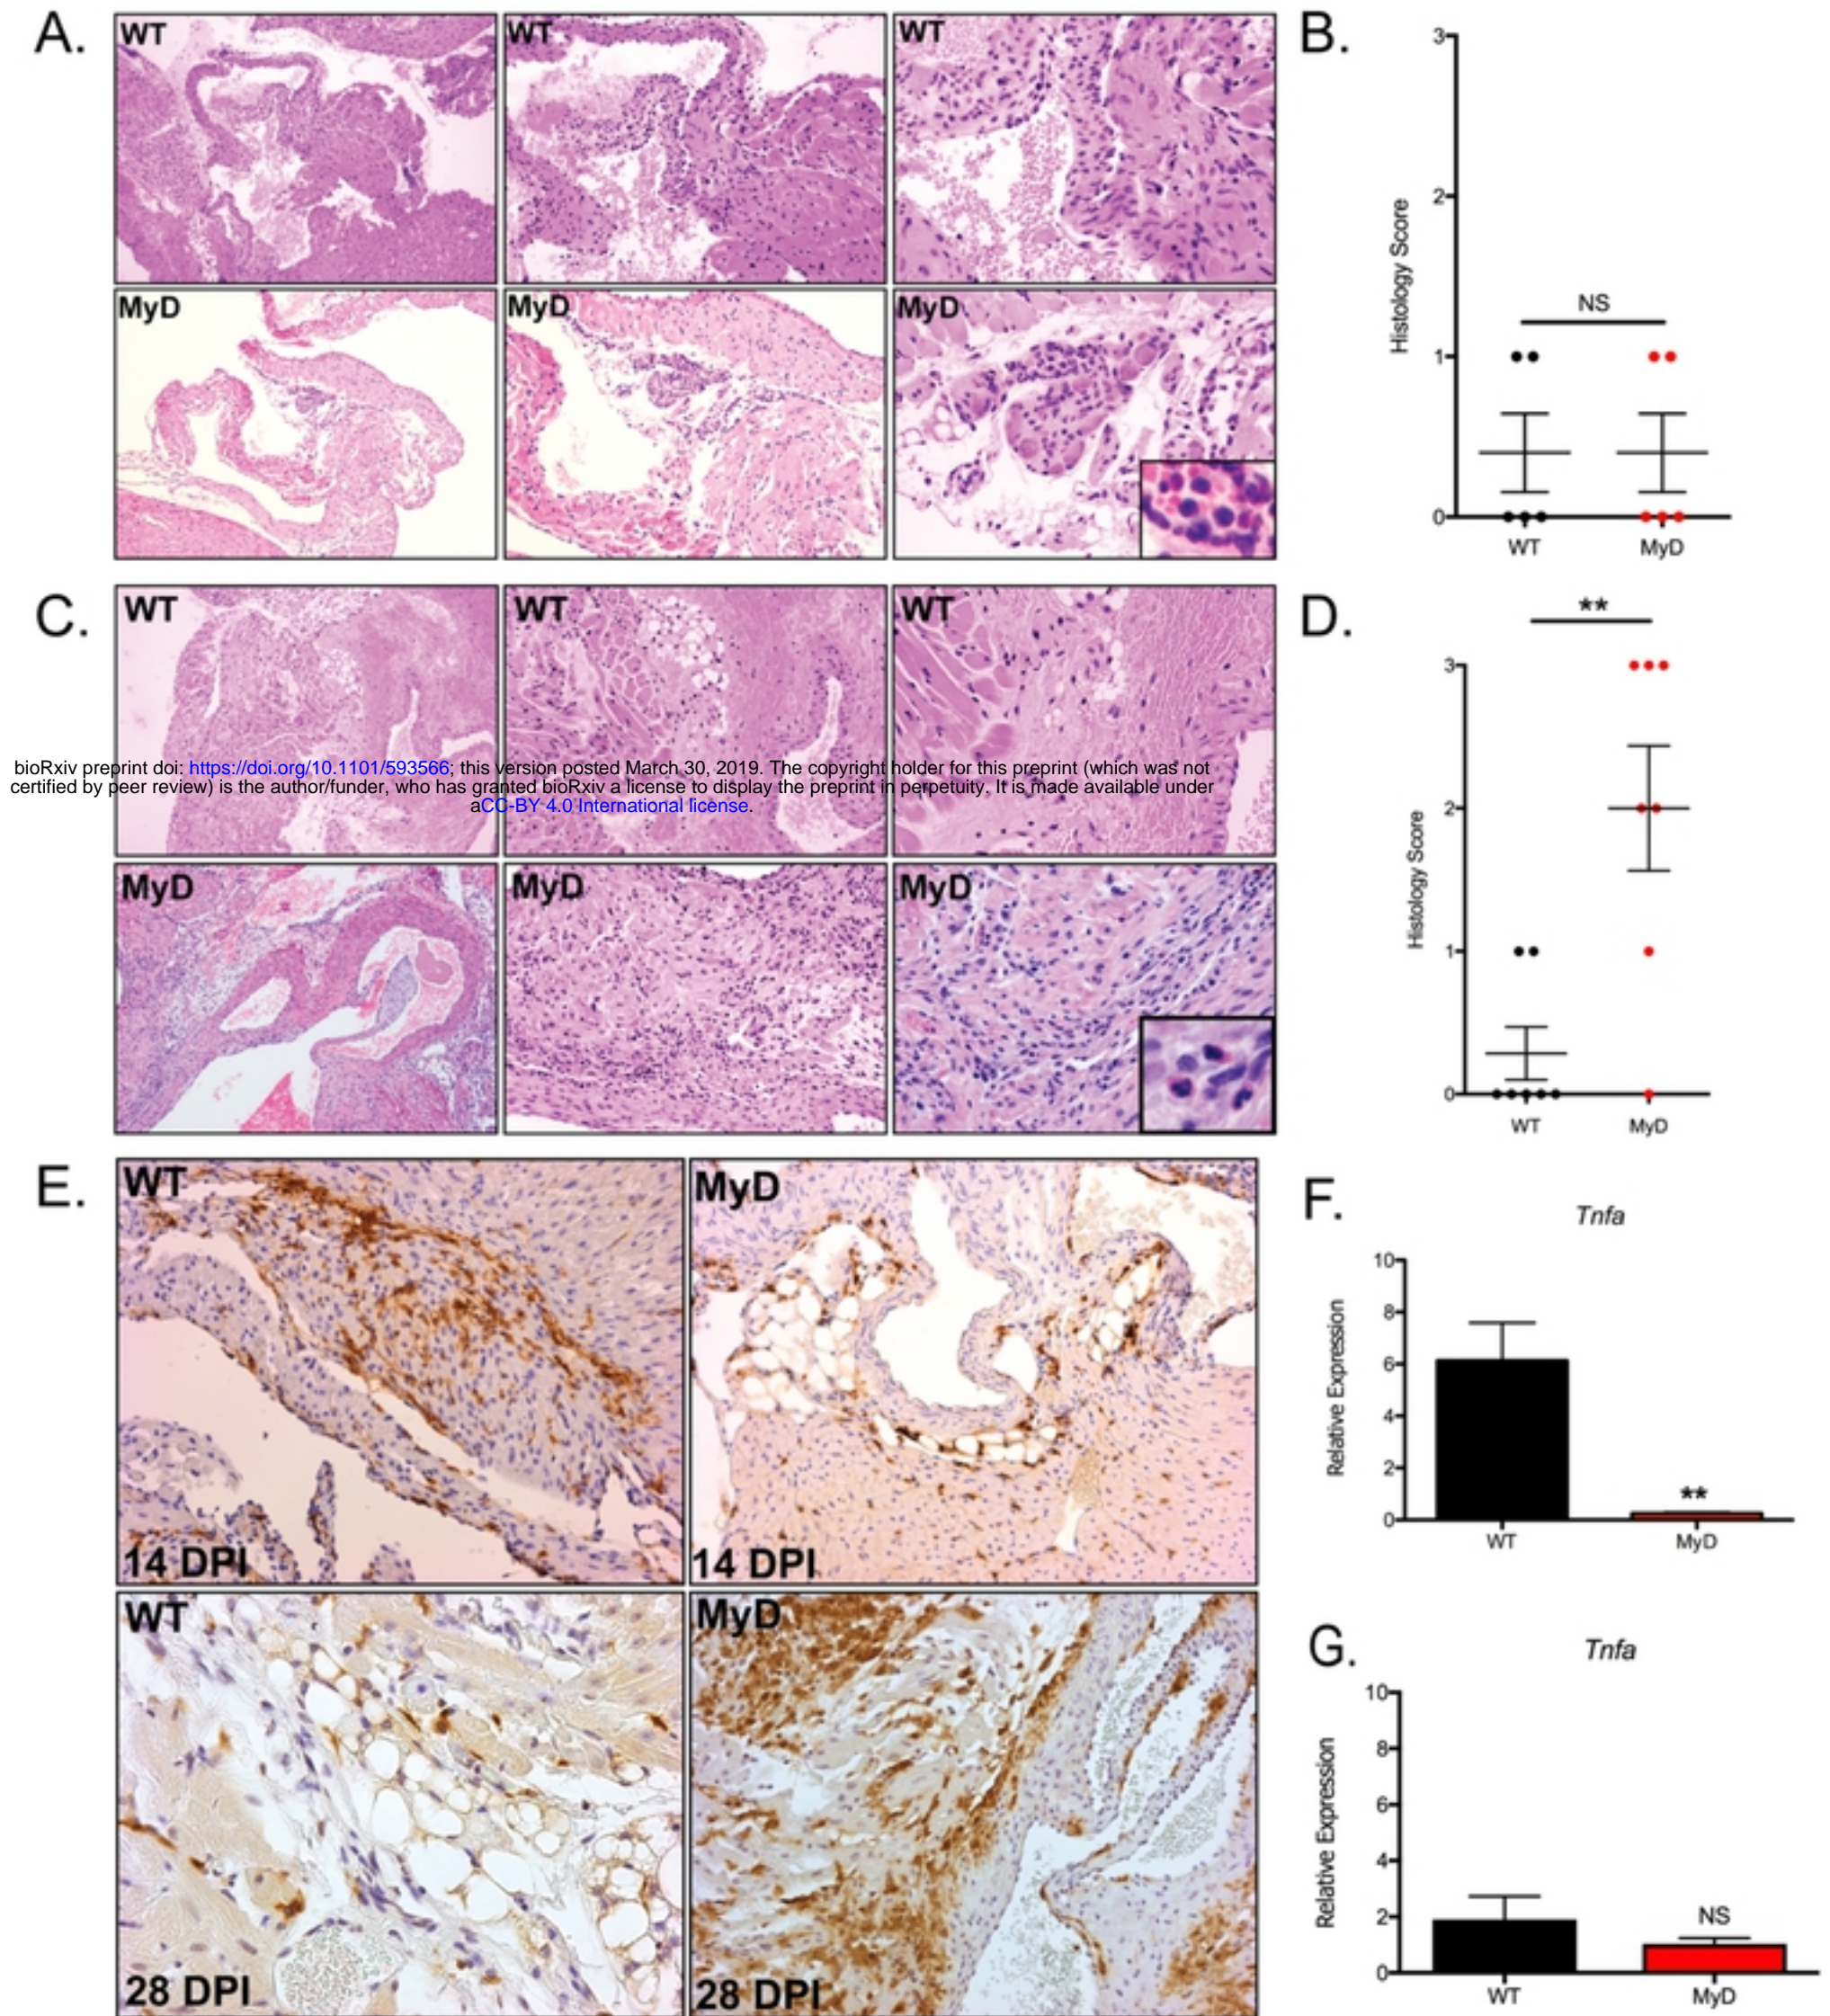

bioRxiv preprint doi: <https://doi.org/10.1101/593566>; this version posted March 30, 2019. The copyright holder for this preprint (which was not certified by peer review) is the author/funder, who has granted bioRxiv a license to display the preprint in perpetuity. It is made available under aCC-BY 4.0 International license.

**Figure 1: MyD88<sup>-/-</sup> mice show increased inflammation severity and macrophage infiltrate 28 days post Bb-infection.**



bioRxiv preprint doi: <https://doi.org/10.1101/593566>; this version posted March 30, 2019. The copyright holder for this preprint (which was not certified by peer review) is the author/funder, who has granted bioRxiv a license to display the preprint in perpetuity. It is made available under aCC-BY 4.0 International license.

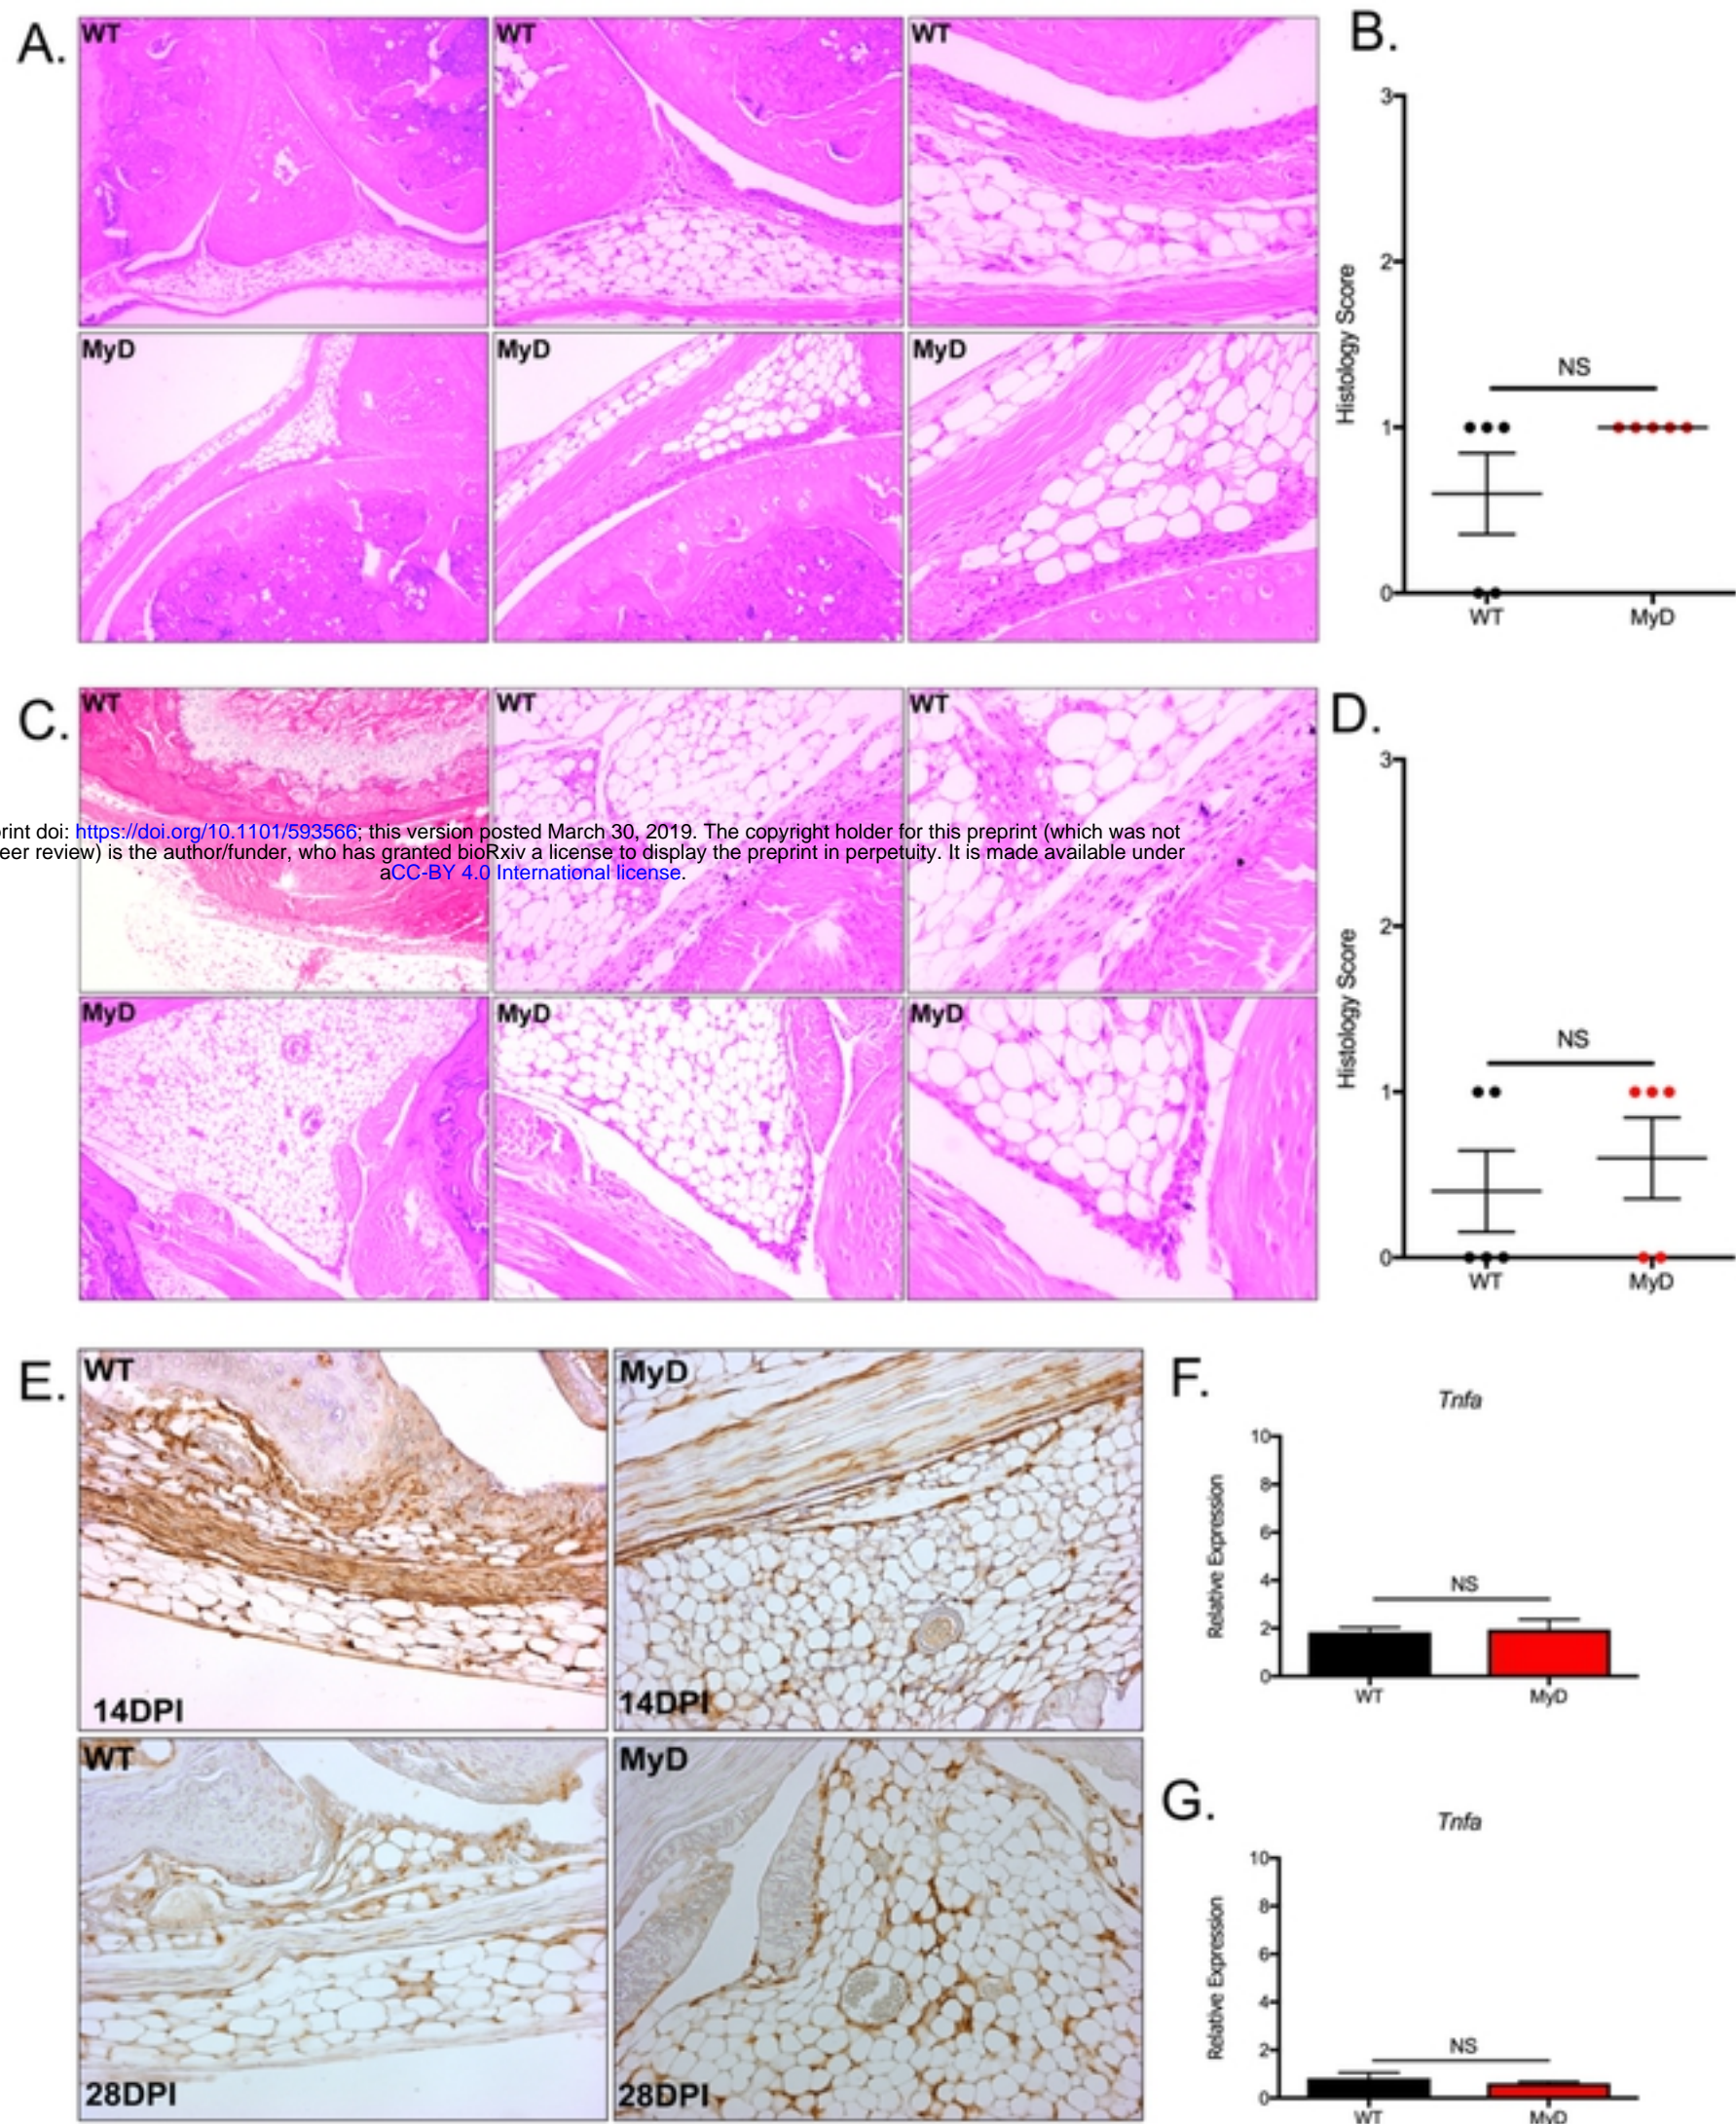

**Figure S2: MyD88<sup>-/-</sup> mice show comparable inflammation and macrophage infiltrate in patellofemoral joint tissue 14- and 28-days post Bb-infection.**



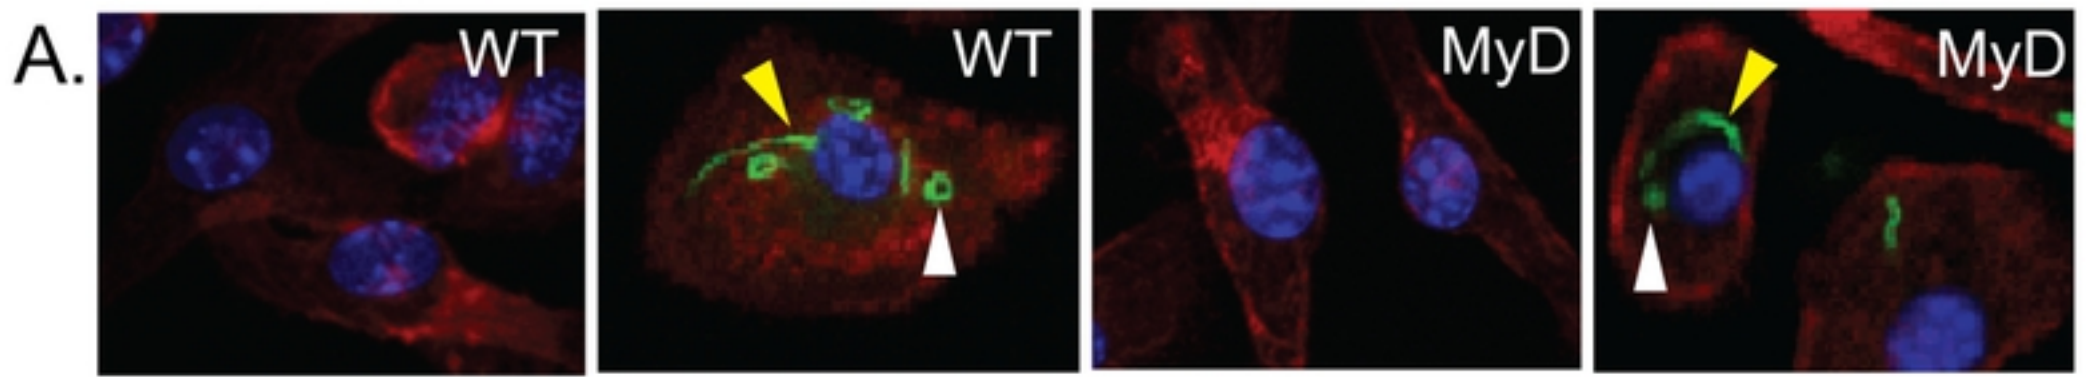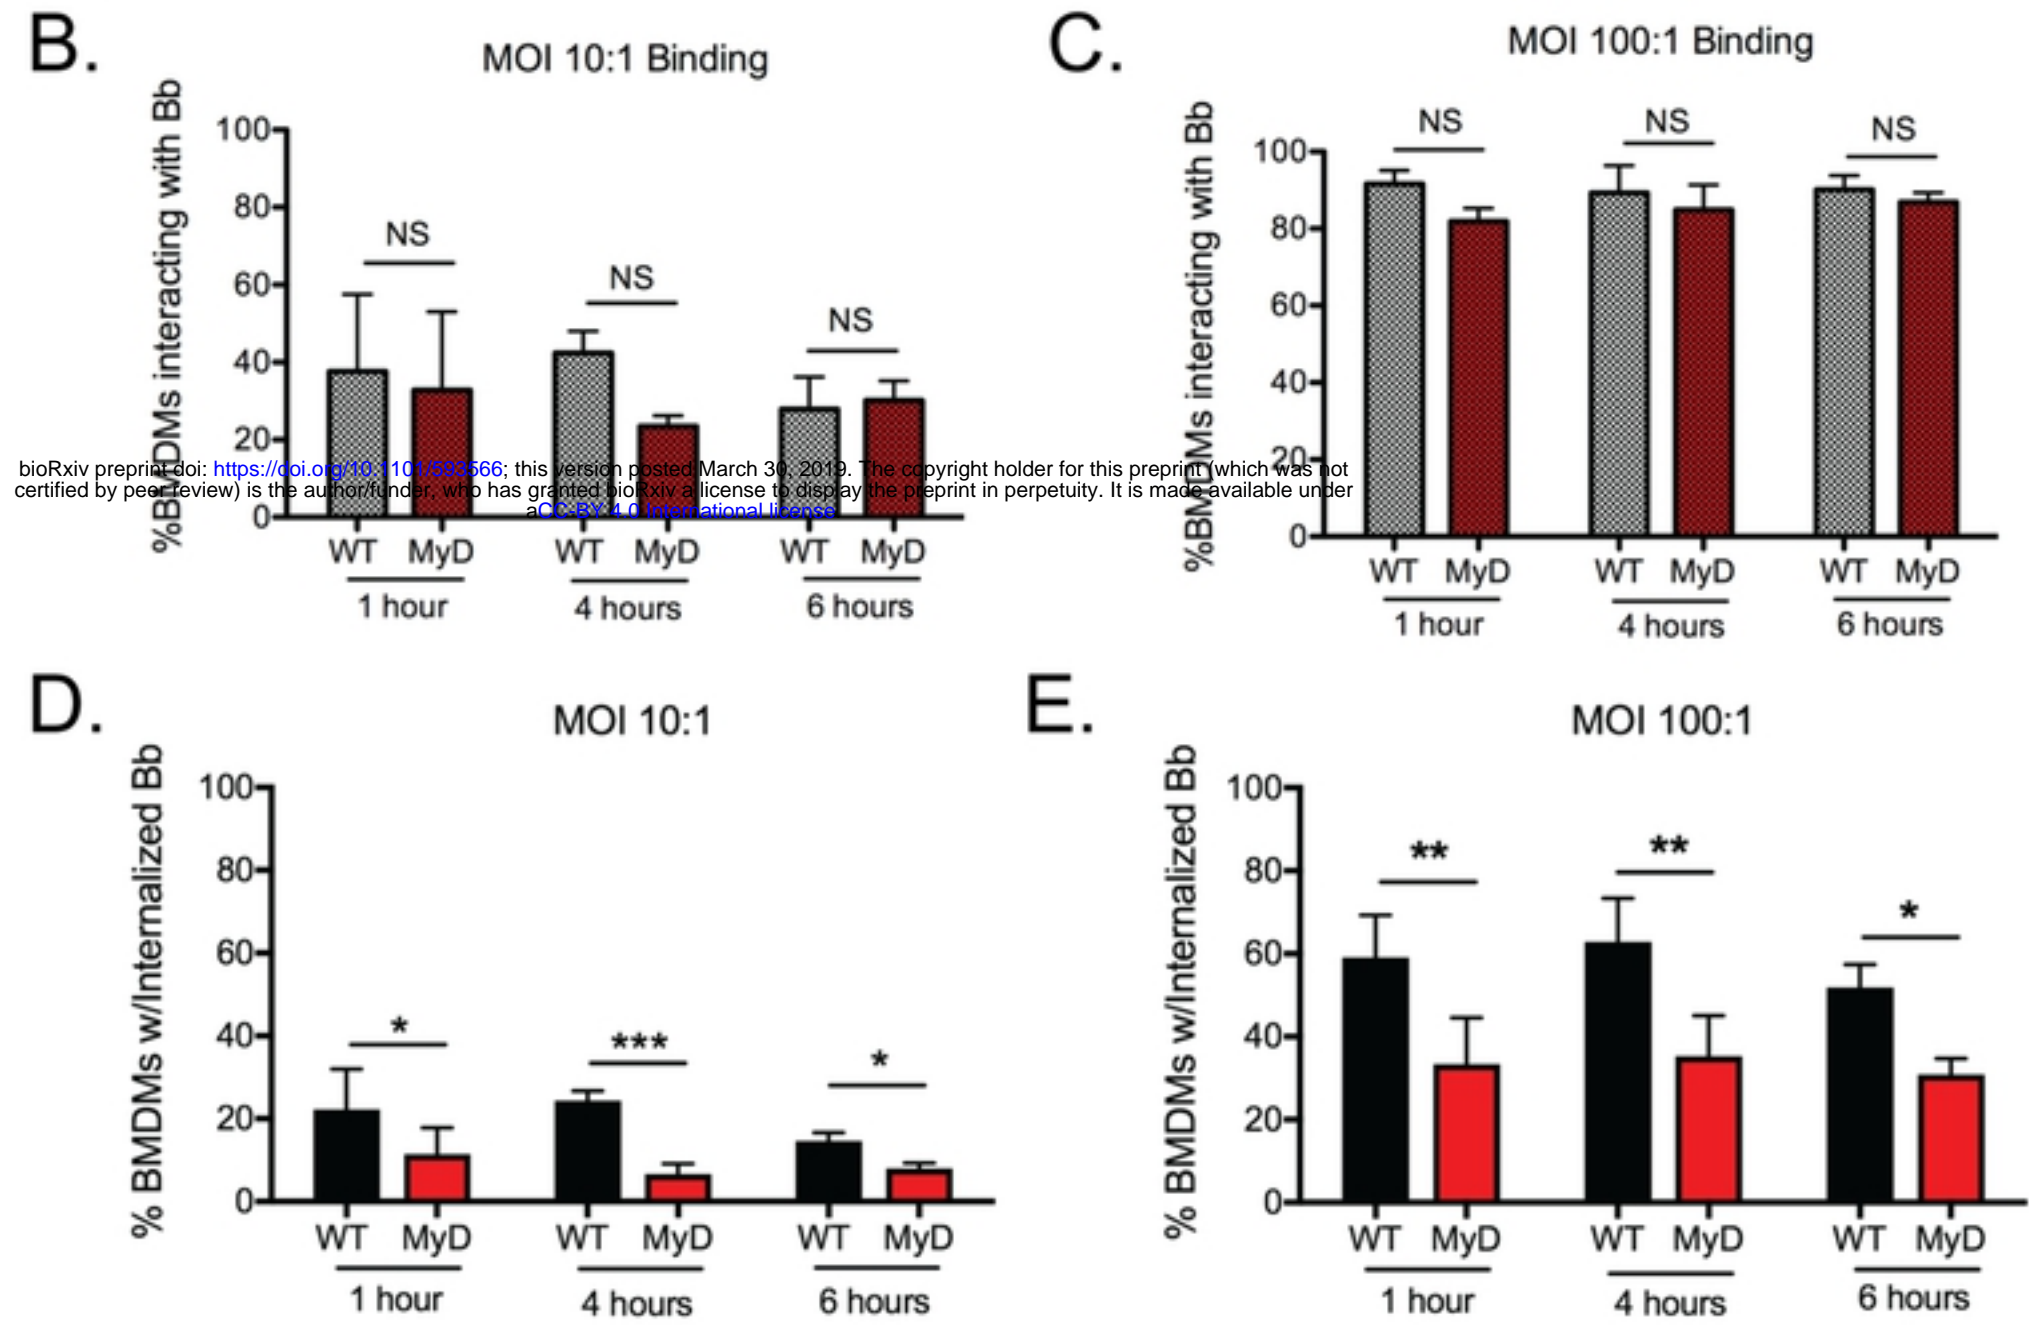

**Figure 2: Quantitation of Bb binding and uptake by WT and MyD88<sup>-/-</sup> BMDMs.**

bioRxiv preprint doi: <https://doi.org/10.1101/333566>; this version posted March 30, 2019. The copyright holder for this preprint (which was not certified by peer review) is the author/funder, who has granted bioRxiv a license to display the preprint in perpetuity. It is made available under aCC-BY 4.0 International license.

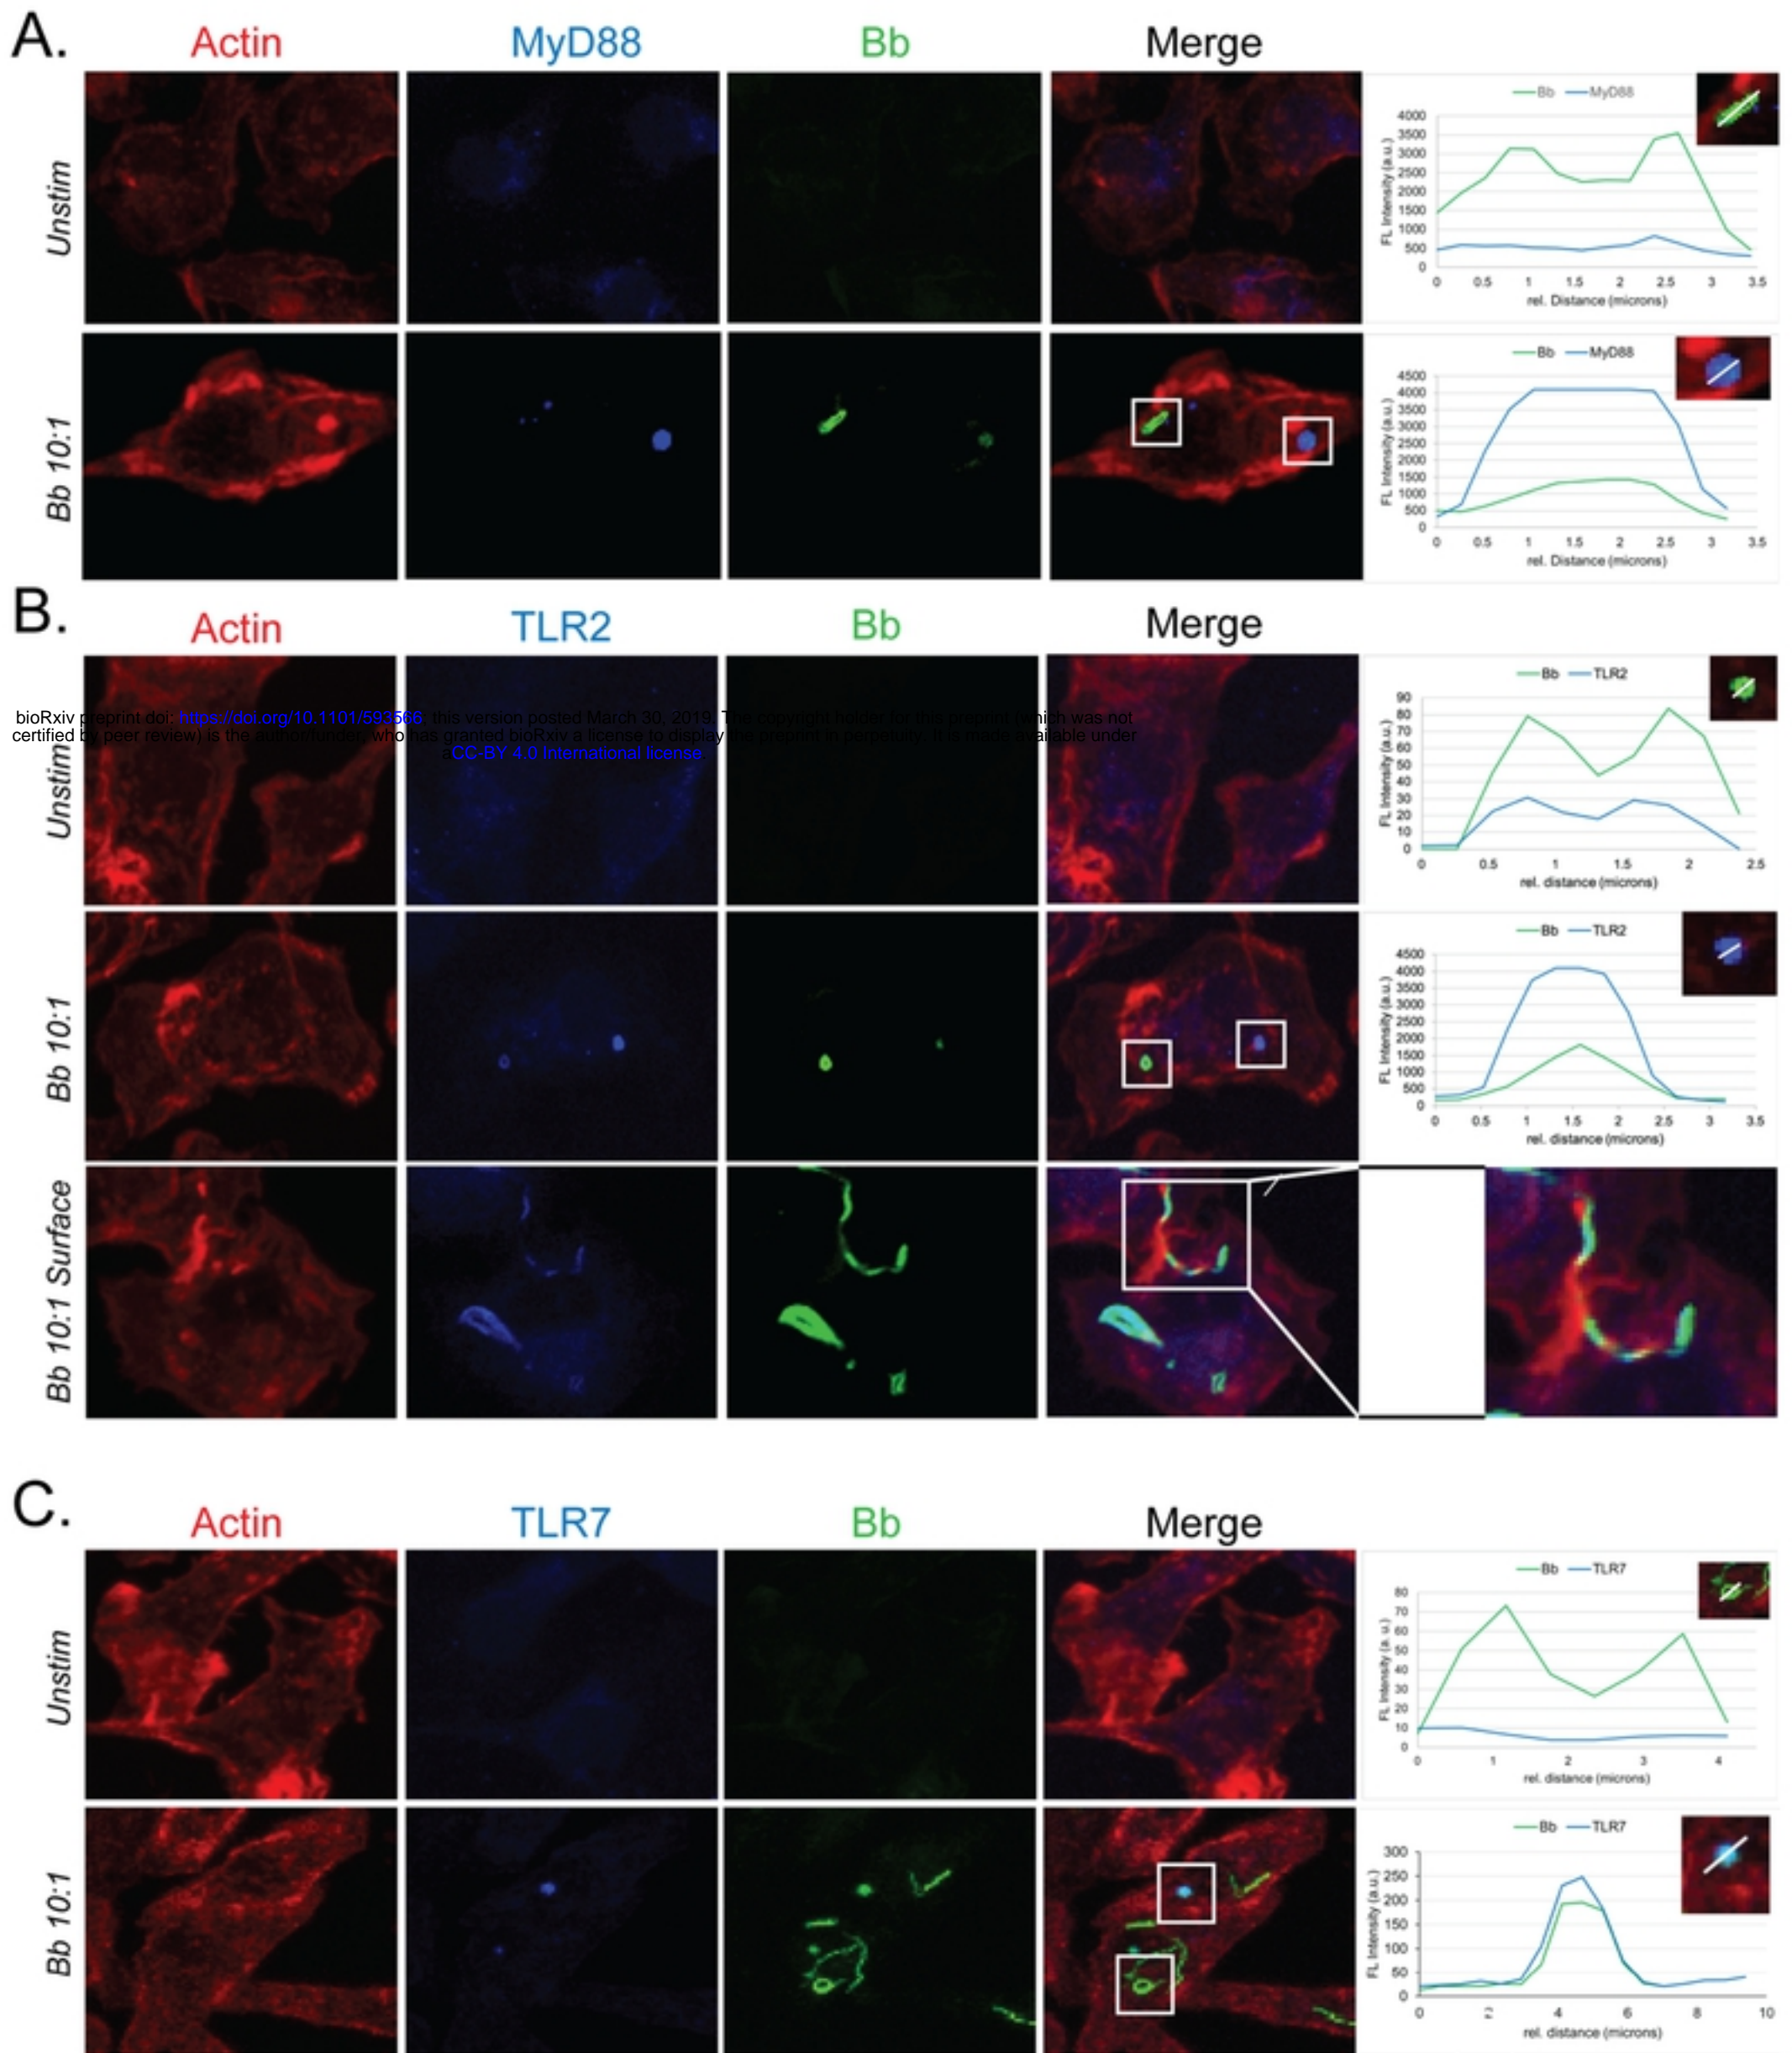

**Figure 3: MyD88, TLR2 and TLR7 colocalize with Bb in phagosomes.**



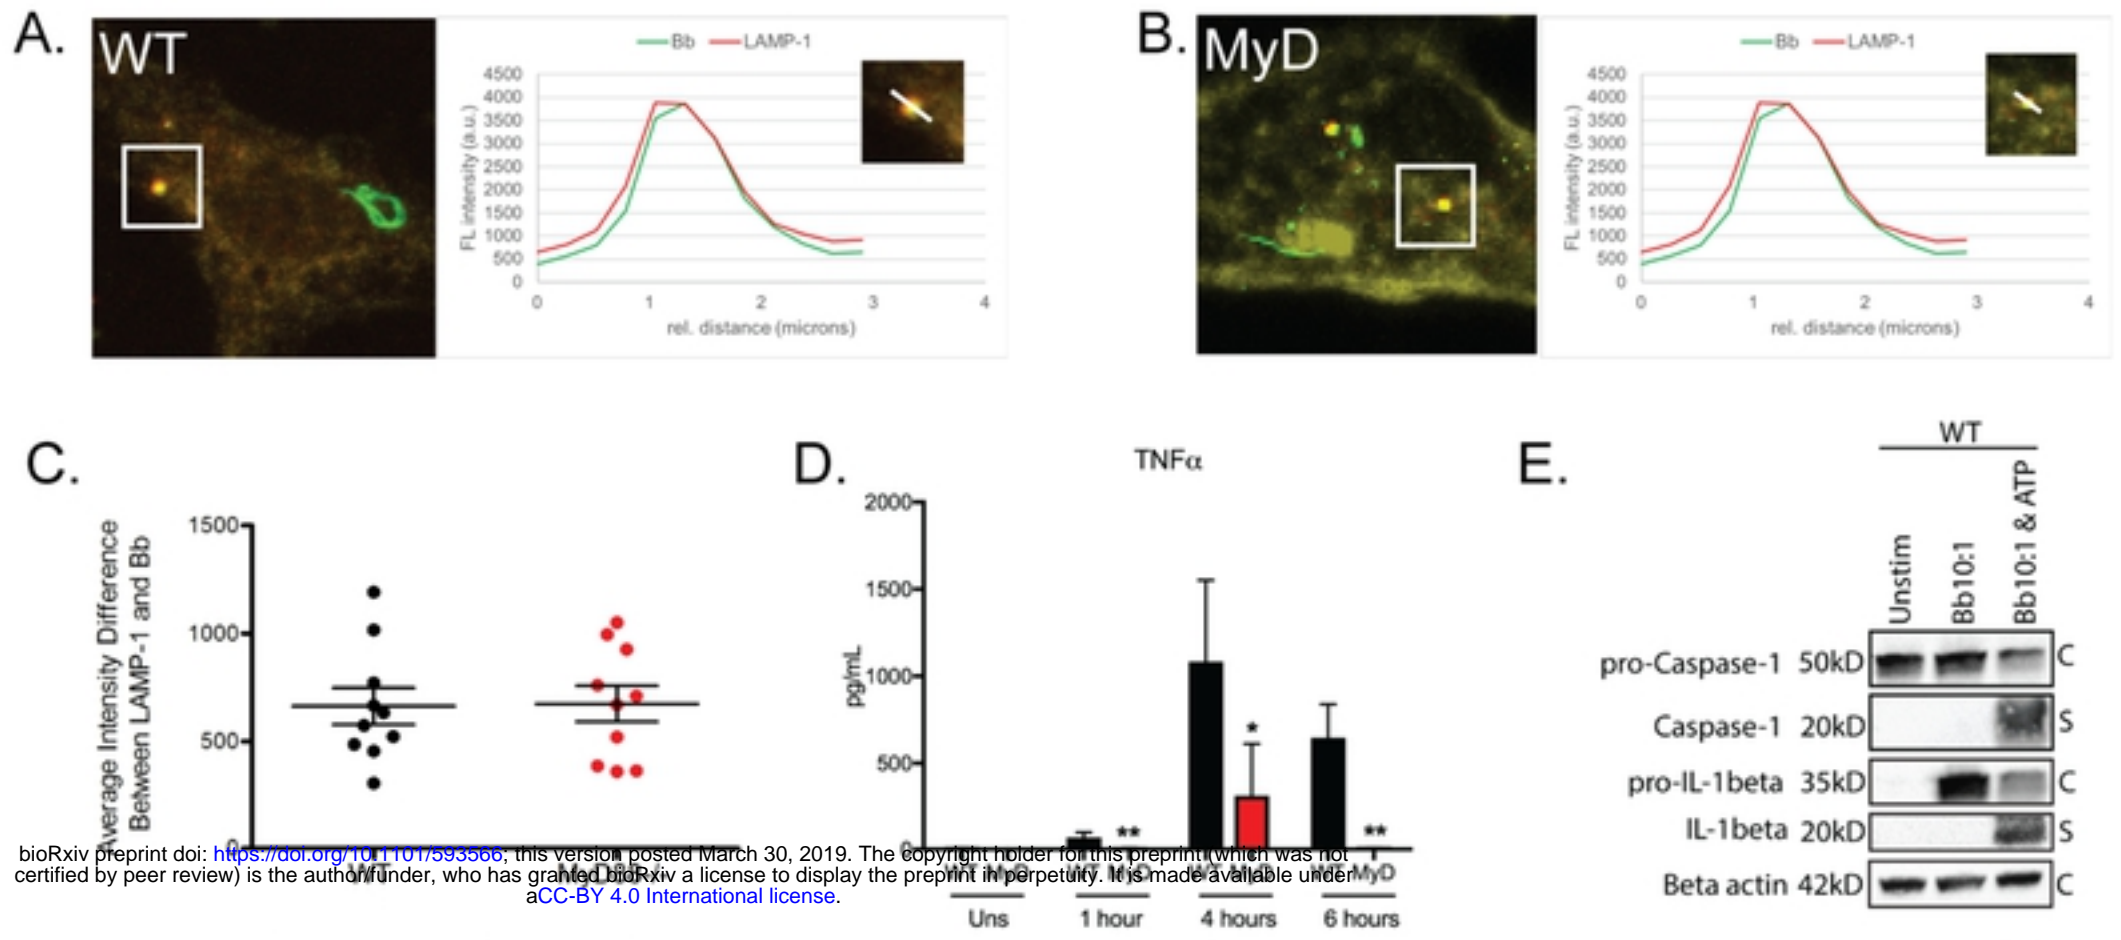

**Figure 4: Colocalization of phagosome markers with internalized Bb in WT and MyD88<sup>-/-</sup> BMDMs.**

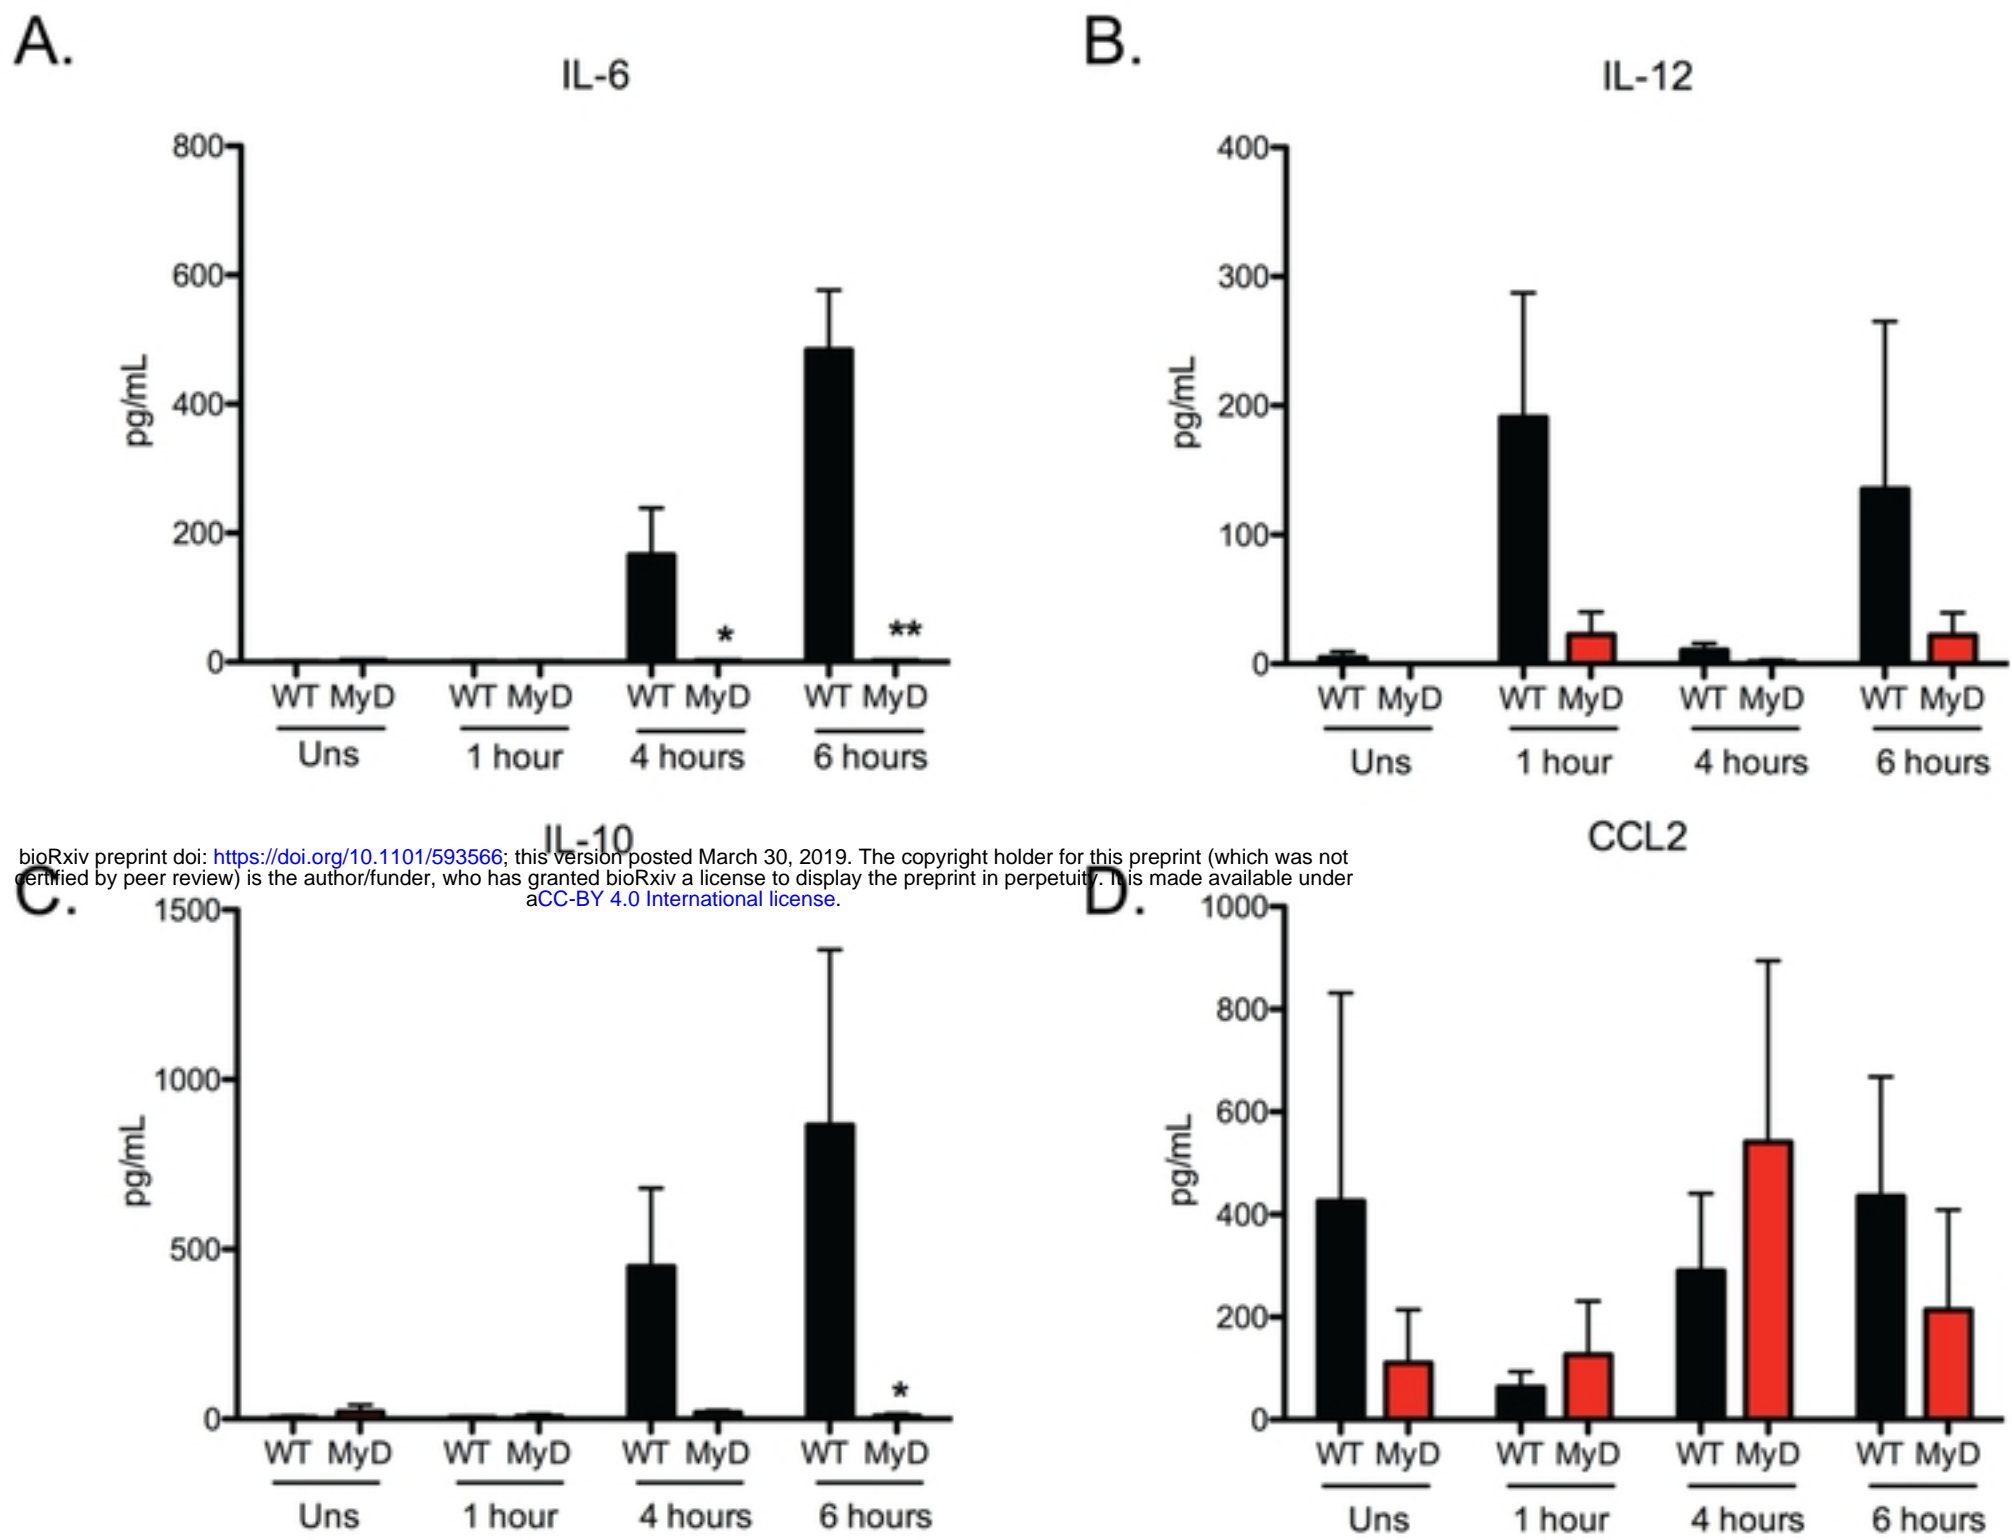

**Figure S3: MyD88<sup>-/-</sup> BMDMs stimulated with Bb show abrogated cytokine production.**

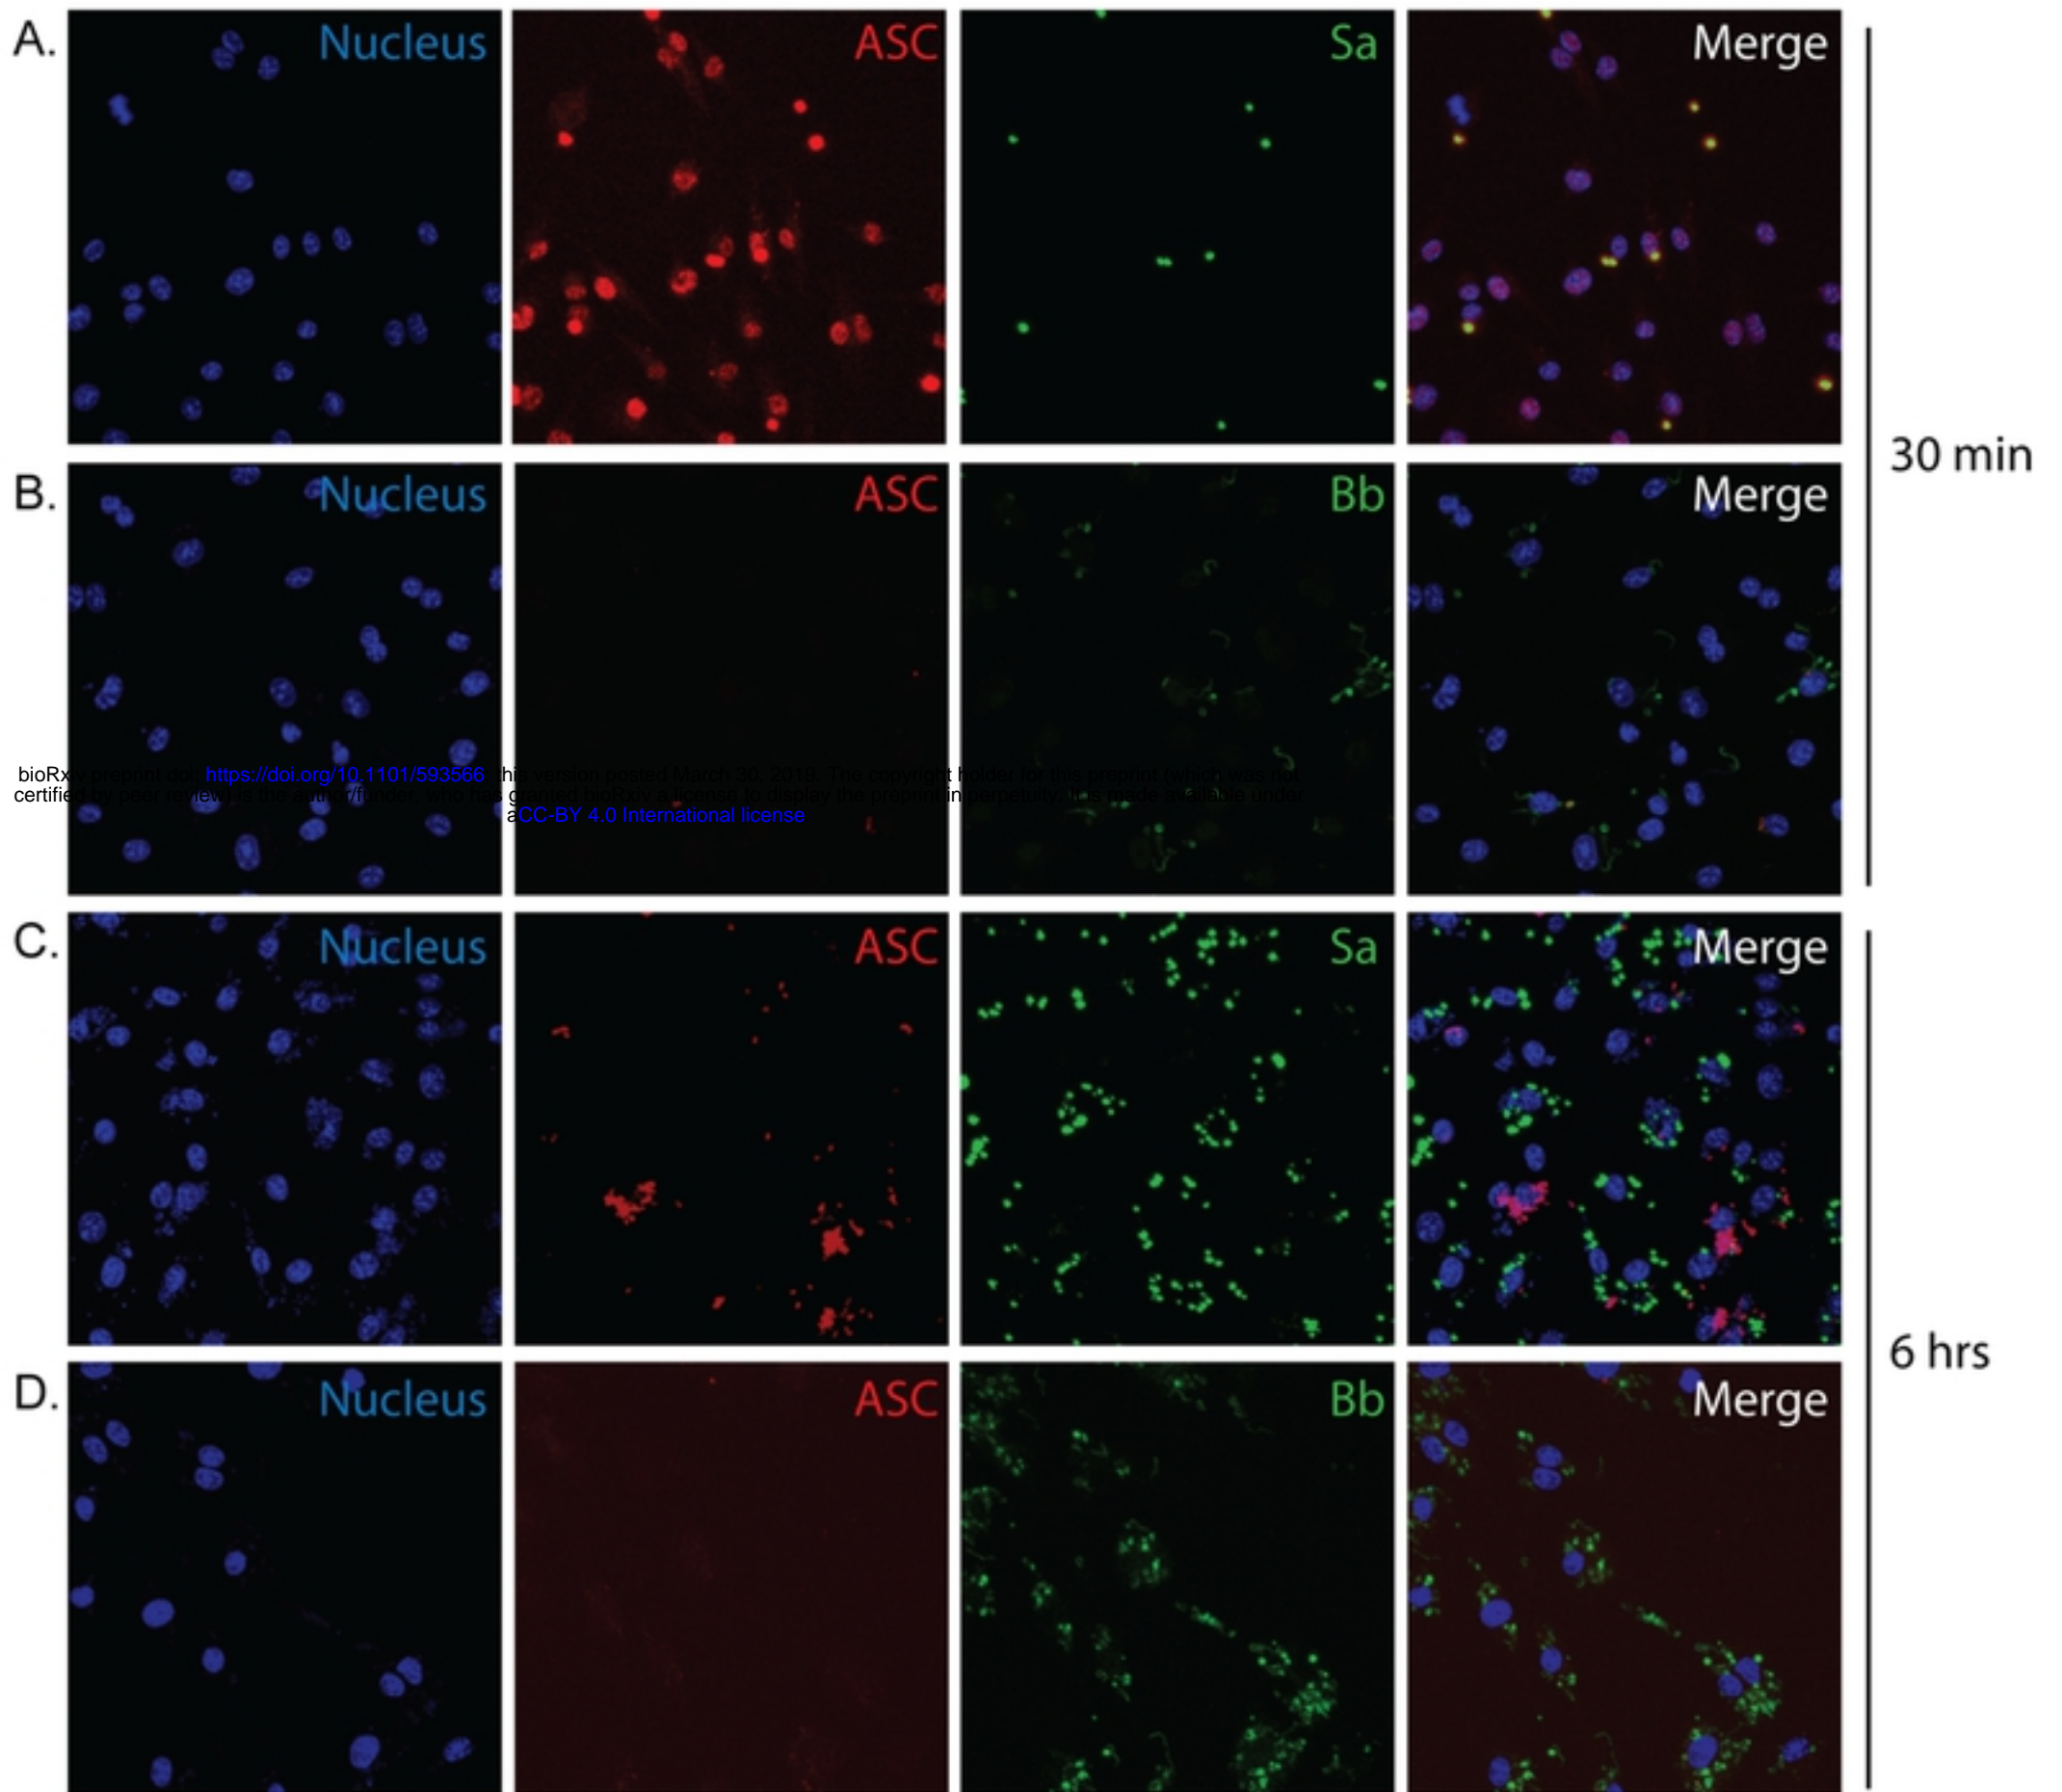

**Figure S4: Bb does not induce ASC formation in BMDMs.**

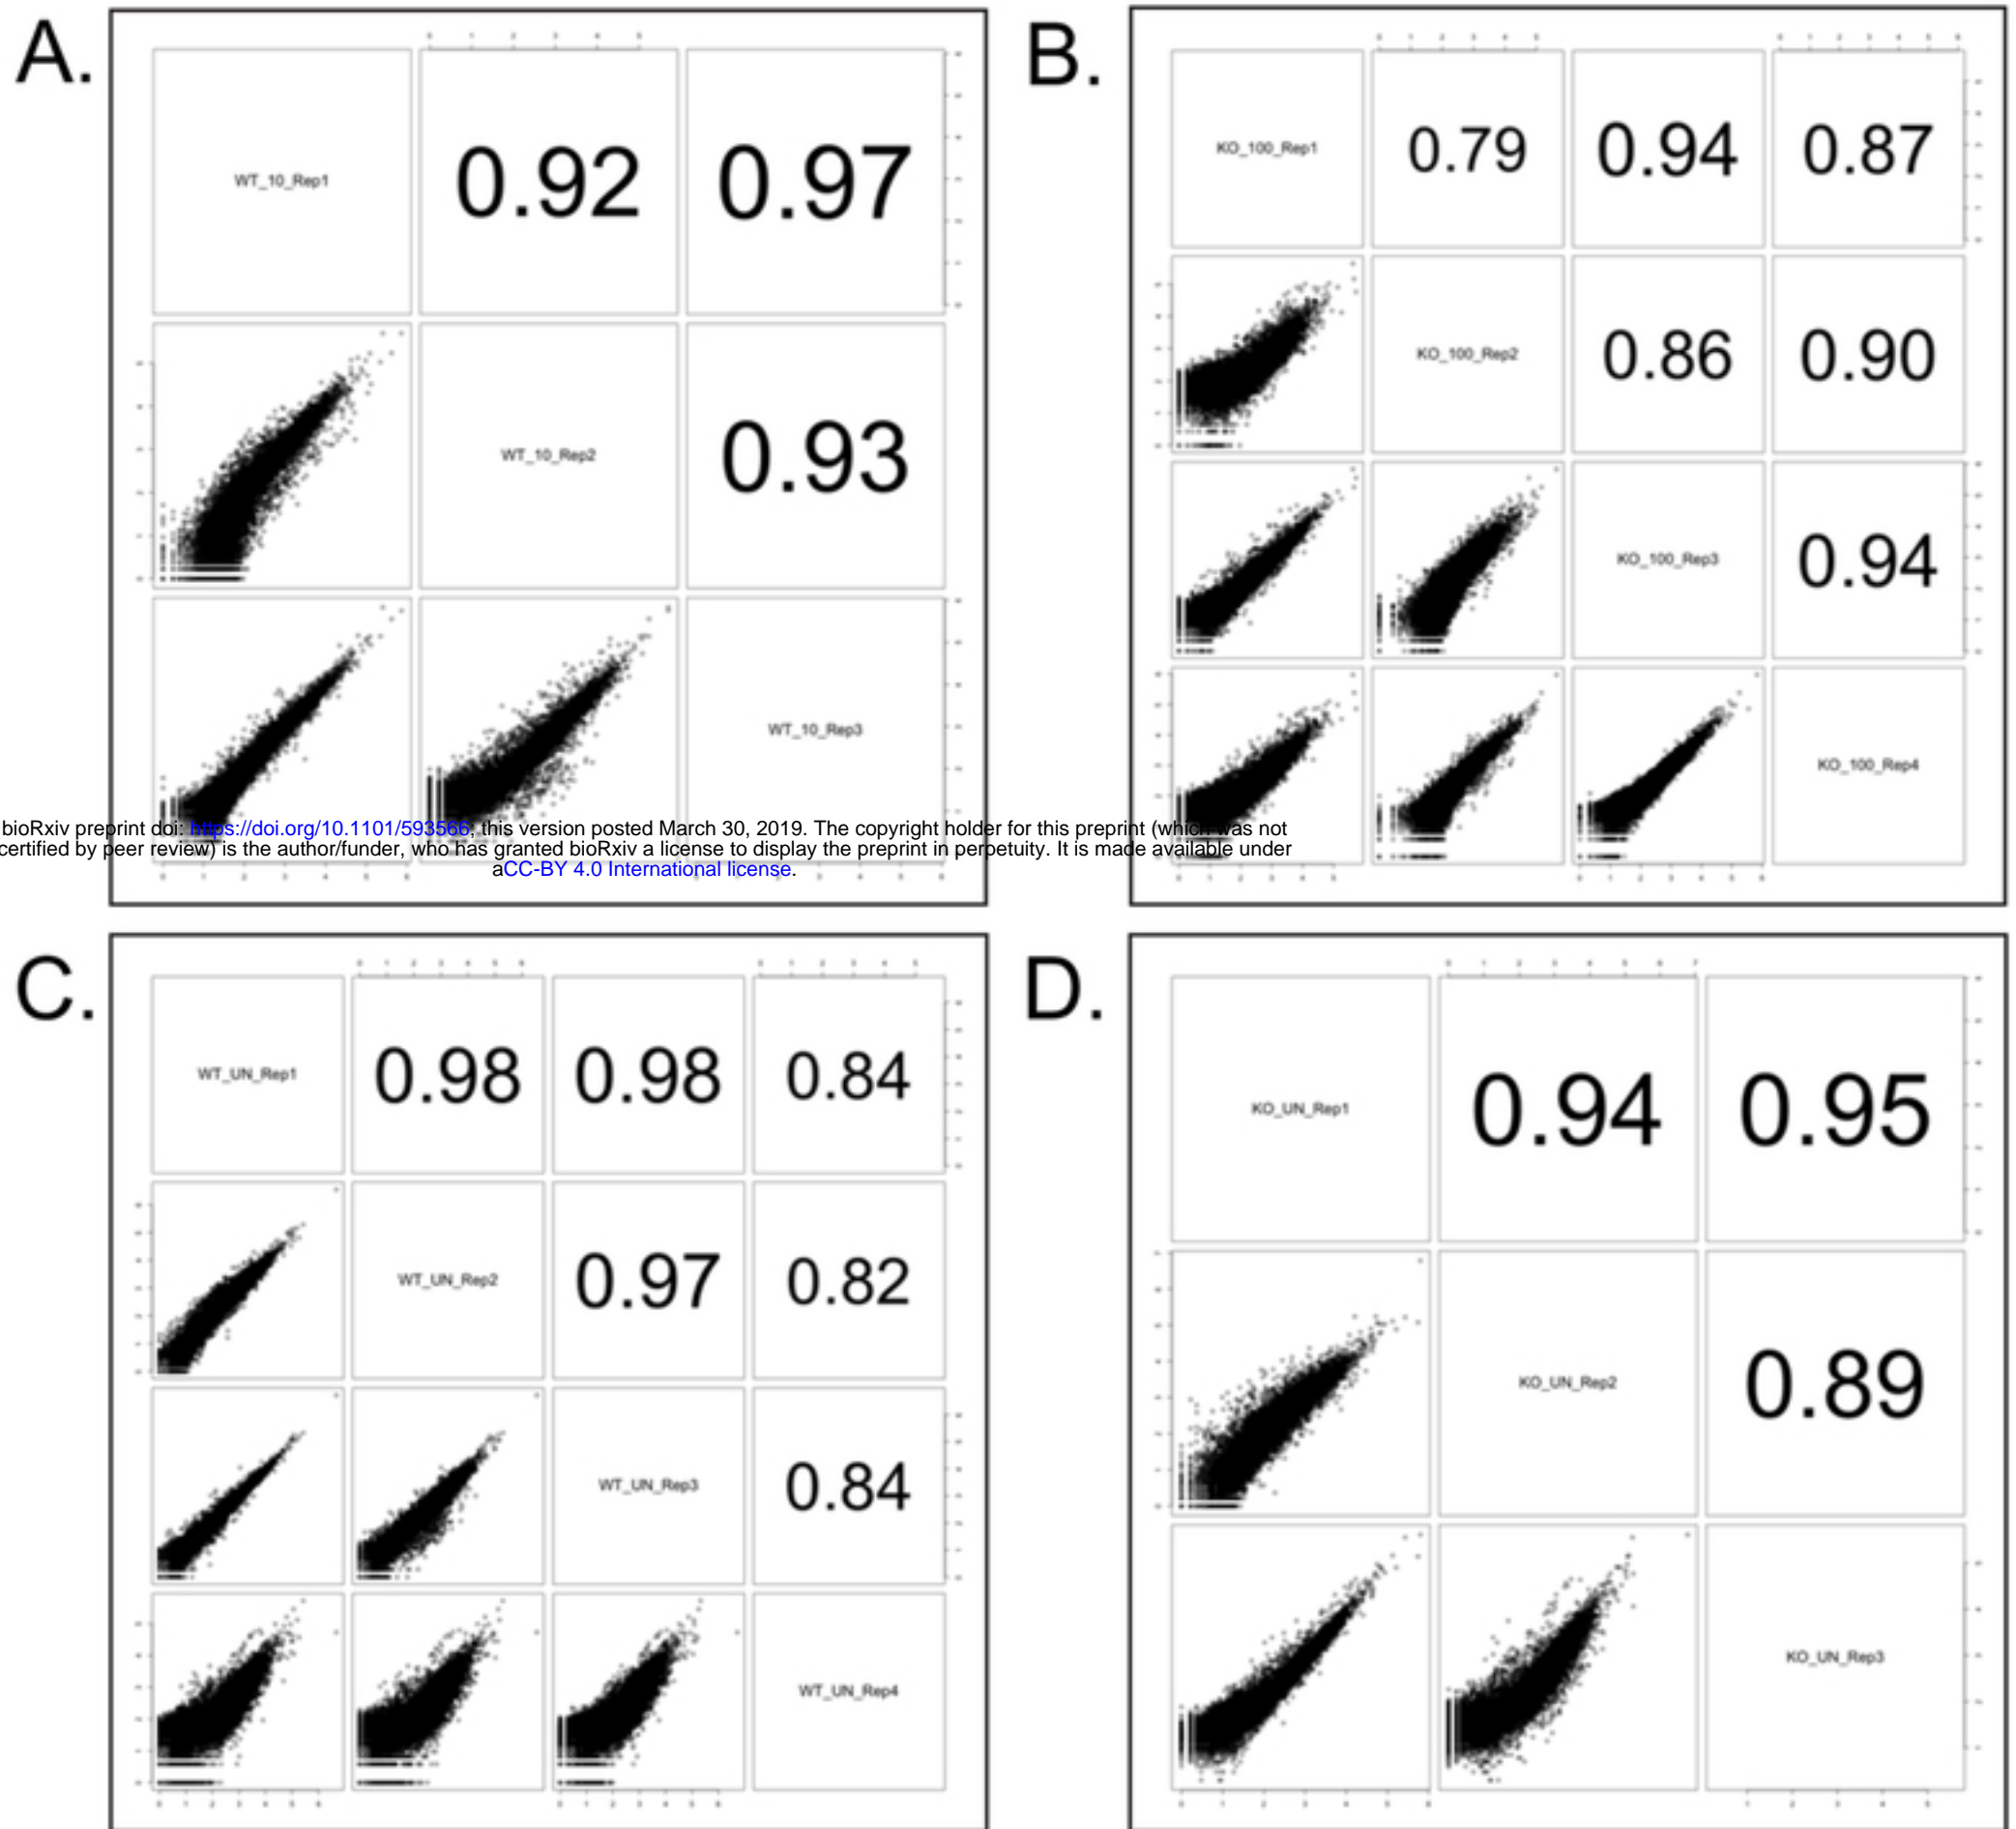

bioRxiv preprint doi: <https://doi.org/10.1101/593566>; this version posted March 30, 2019. The copyright holder for this preprint (which was not certified by peer review) is the author/funder, who has granted bioRxiv a license to display the preprint in perpetuity. It is made available under aCC-BY 4.0 International license.

**Figure S5: Correlation of reads of RNA sequencing data.**



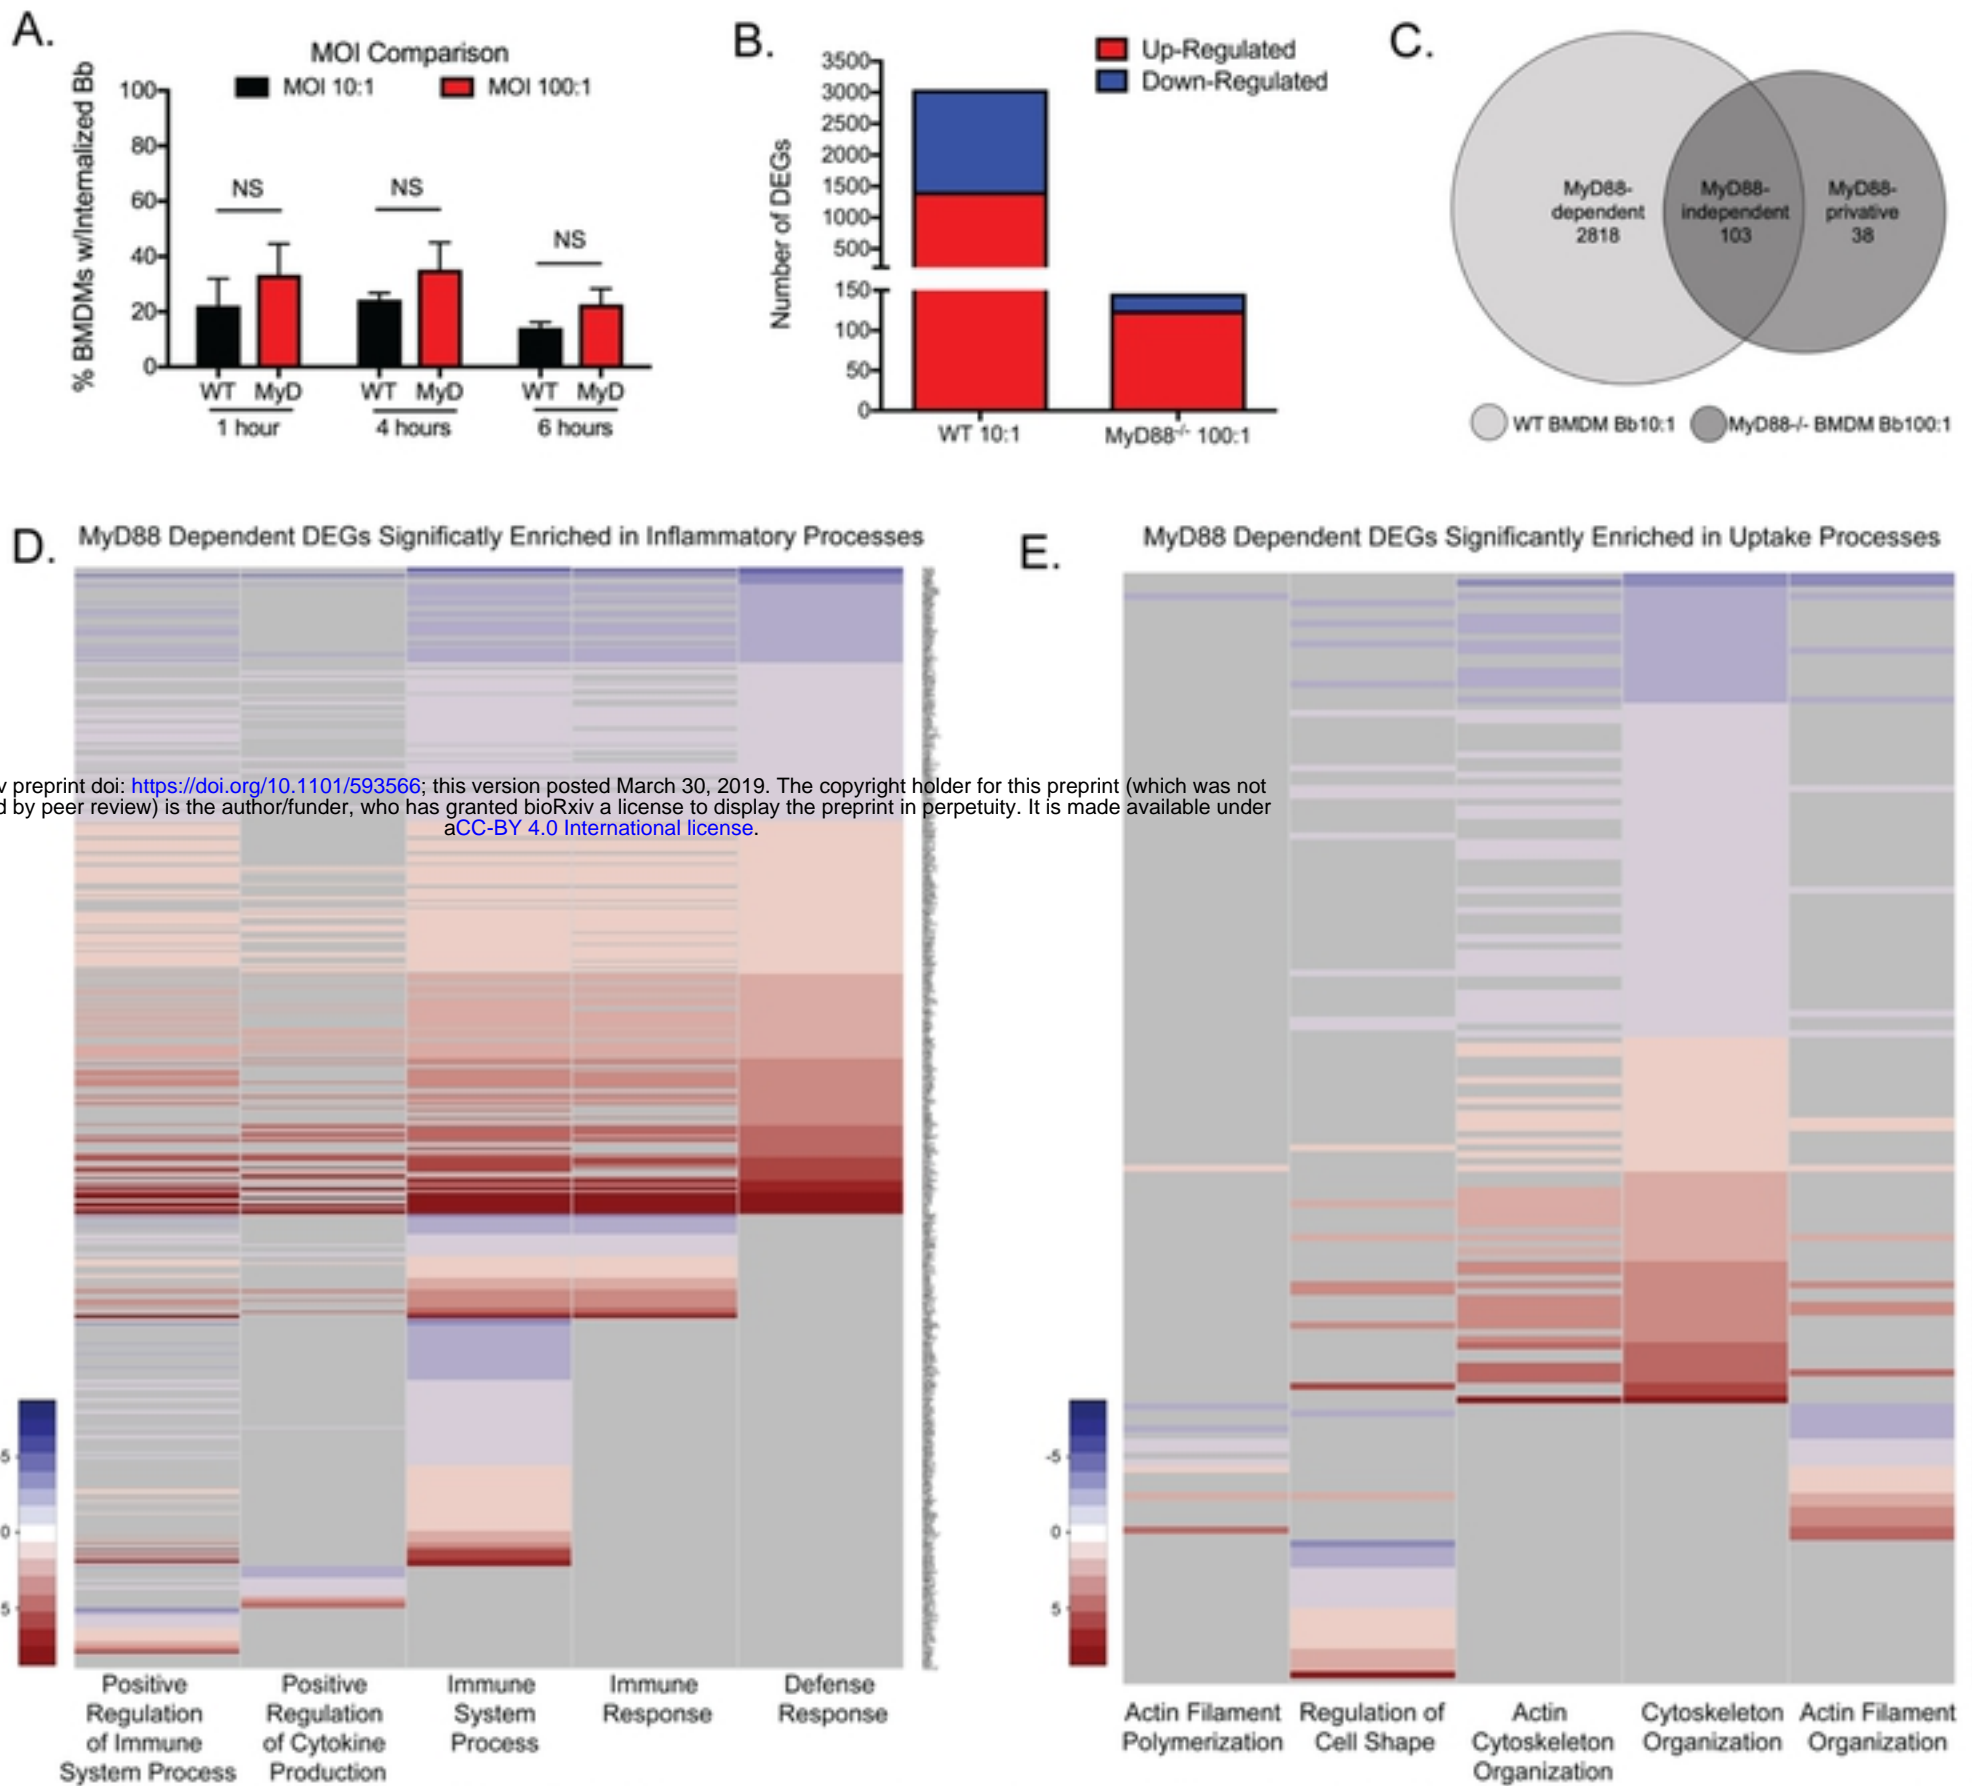

**Figure 5: MyD88-dependent DEGs are significantly enriched in biological processes related to inflammation and uptake.**



bioRxiv preprint doi: <https://doi.org/10.1101/593566>; this version posted March 30, 2019. The copyright holder for this preprint (which was not certified by peer review) is the author/funder, who has granted bioRxiv a license to display the preprint in perpetuity. It is made available under aCC-BY 4.0 International license.

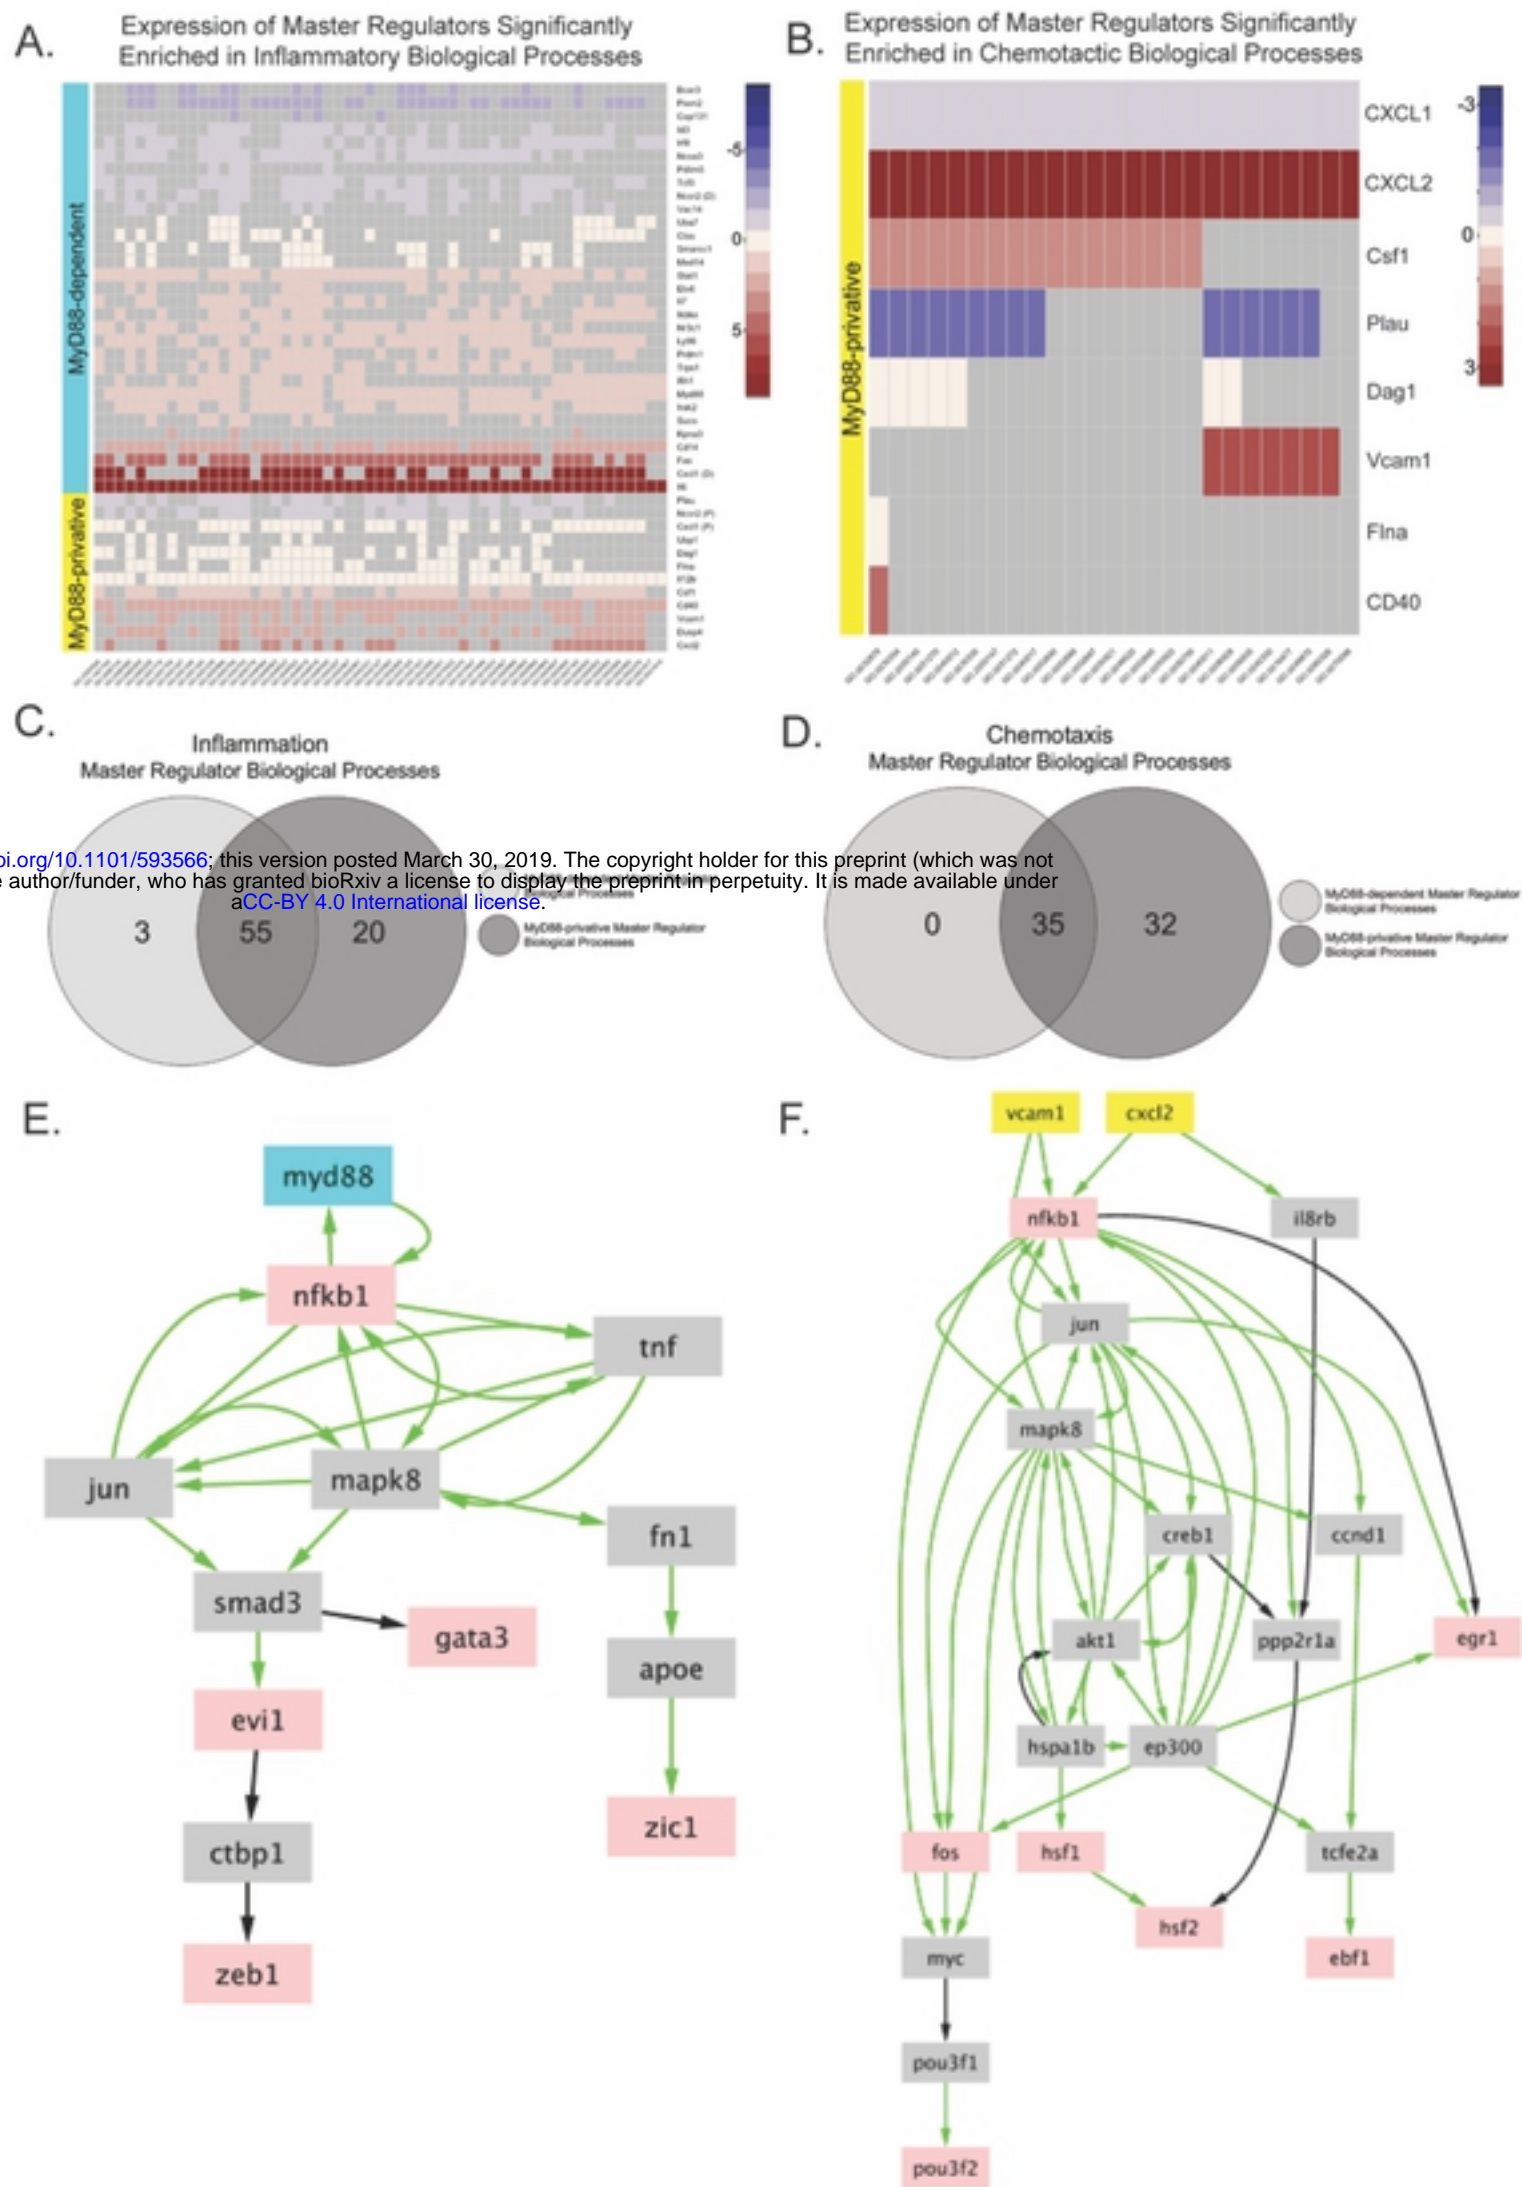

**Figure 7: Master regulators of MyD88-dependent and MyD88-privative DEGs control similar inflammatory processes but different chemotactic processes.**



bioRxiv preprint doi: <https://doi.org/10.1101/593566>; this version posted March 30, 2019. The copyright holder for this preprint (which was not certified by peer review) is the author/funder, who has granted bioRxiv a license to display the preprint in perpetuity. It is made available under aCC-BY 4.0 International license.

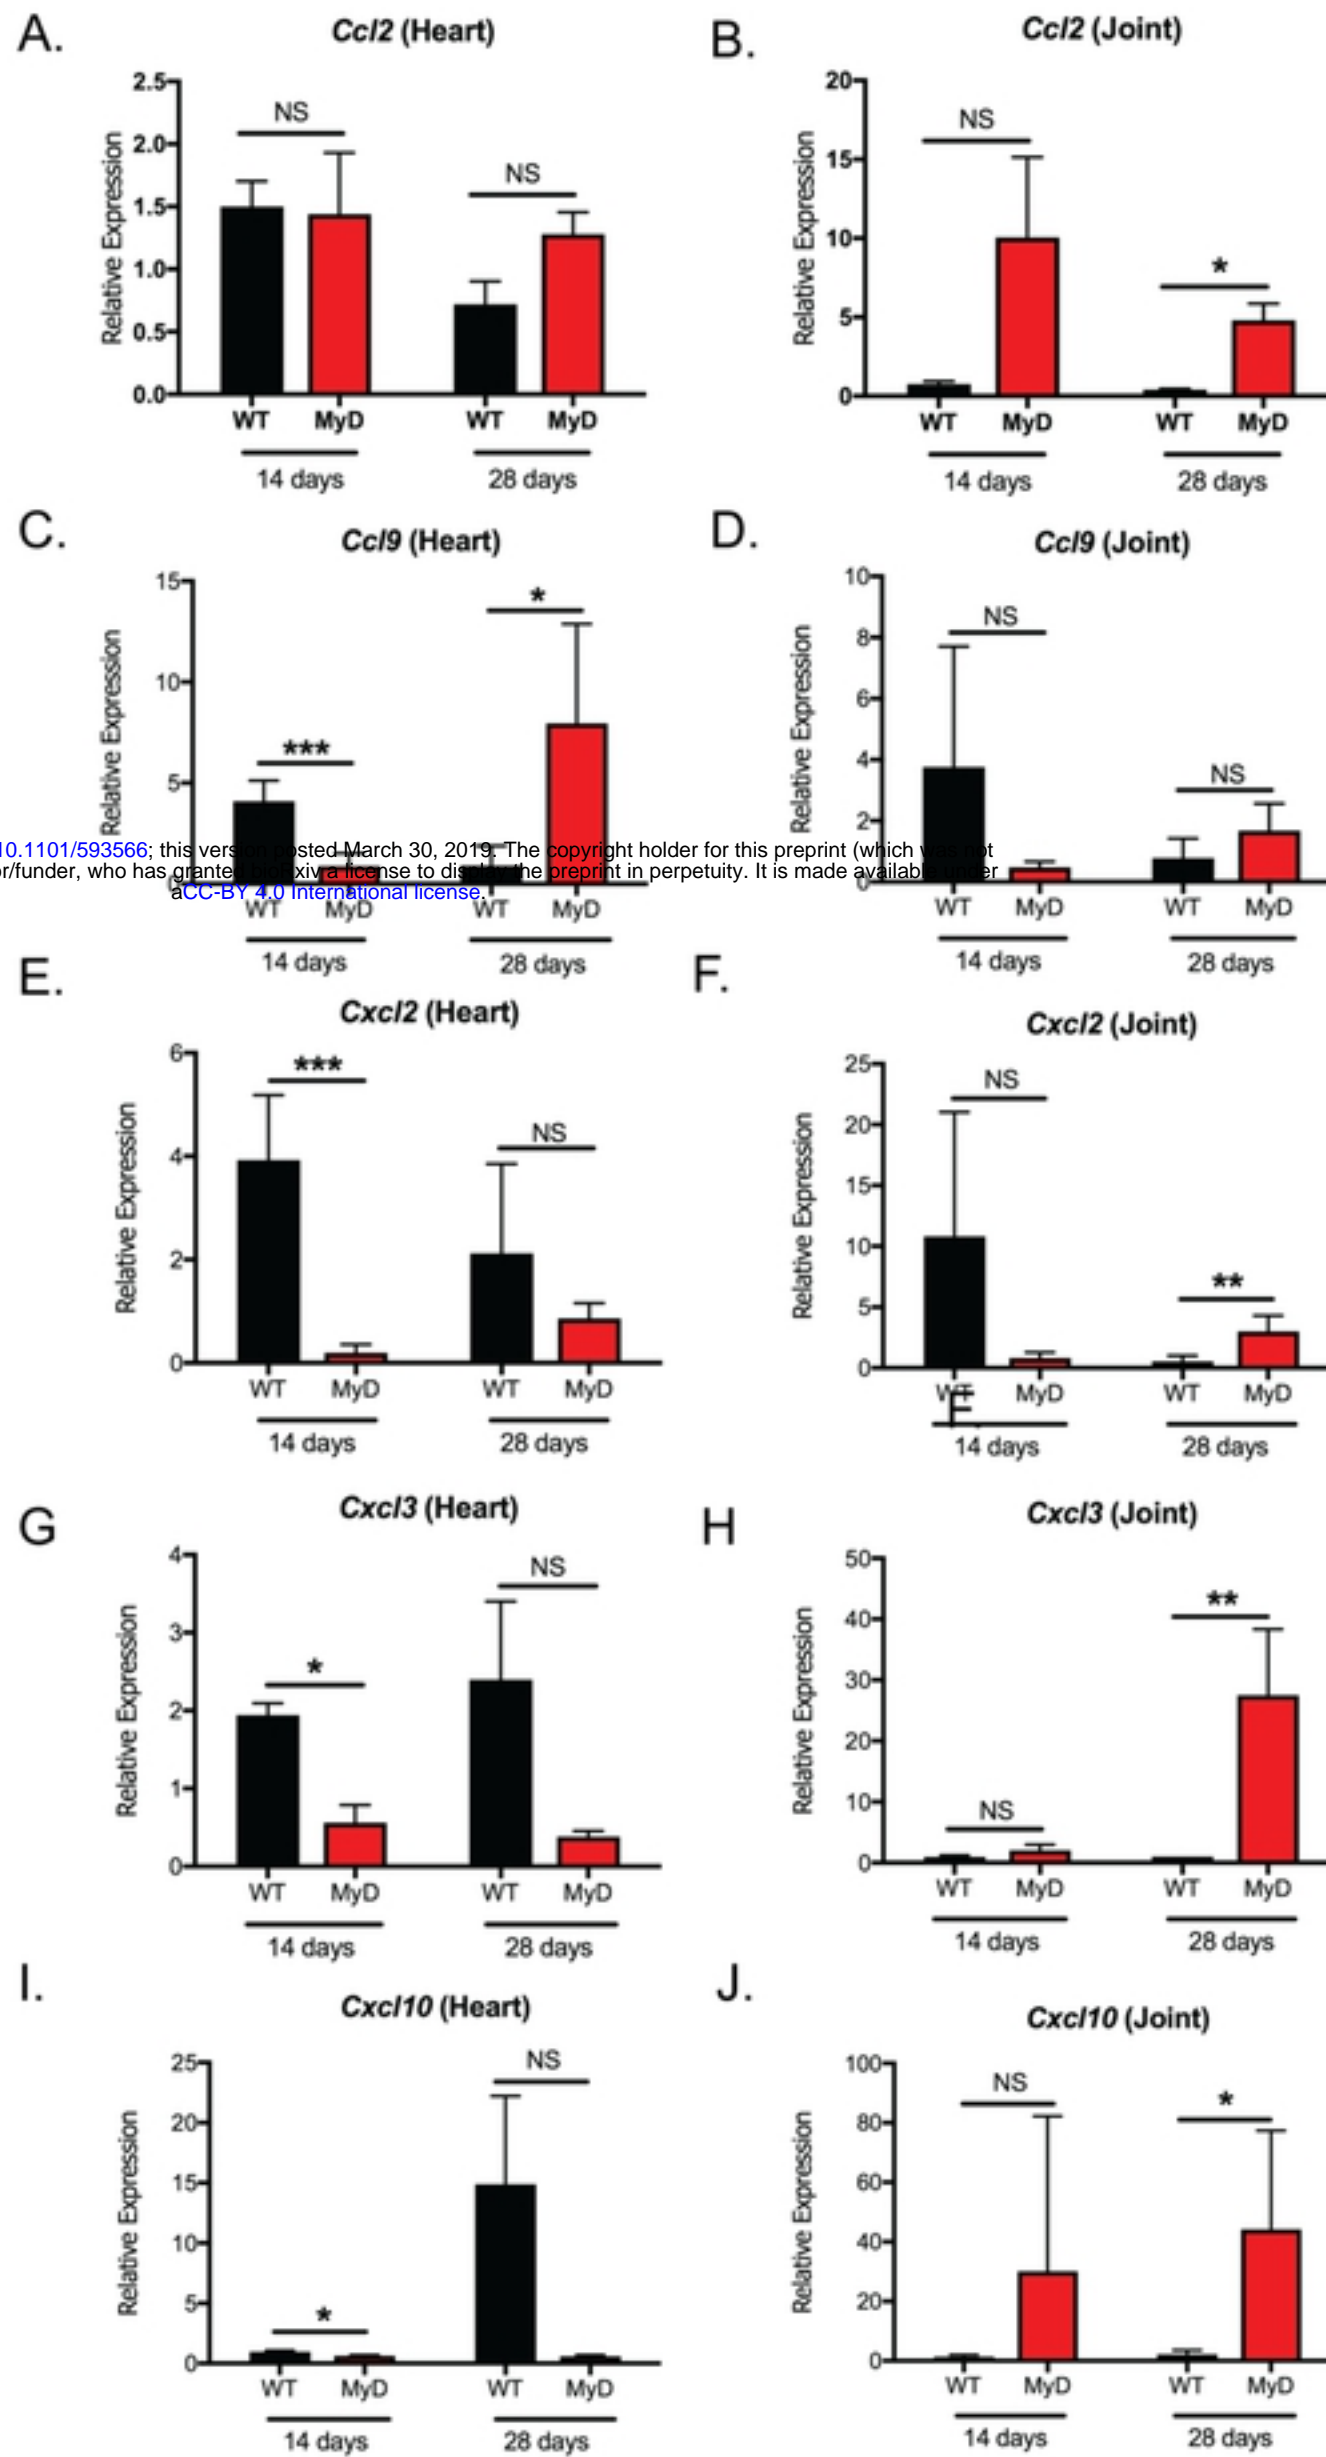

**Figure S6: MyD88-independent chemokines are produced in MyD88<sup>-/-</sup> mice during *in vivo* infection.**
